# Supplementary material for: Quassinoids from the Roots of Eurycoma longifolia and Their Anti-Proliferation Activities
Source: MDPI journal article supplement (doi:10.3390/molecules26195939), 2021-09-30
Supplement: s1 [file s1]

# Quassinoids from the Roots of *Eurycoma longifolia* and Their Anti-proliferation Activities

Wei-Qun Yang<sup>1,2,3,†</sup>, Wei Tang<sup>2,3,†</sup>, Xiao-Jun Huang<sup>2,3</sup>, Jian-Guo Song<sup>2,3</sup>, Yue-Yue Li<sup>2,3</sup>, Yu Xiong<sup>2,3</sup>, Chun-Lin Fan<sup>2,3</sup>, Zhen-Long Wu<sup>2,3,\*</sup>, Ying Wang<sup>2,3,\*</sup> and Wen-Cai Ye<sup>2,3</sup>

<sup>1</sup> School of Pharmaceutical Sciences, Guangzhou University of Chinese Medicine, Guangzhou 510006, China; yangwq\_zzy@gzucm.edu.cn

<sup>2</sup> Center for Bioactive Natural Molecules and Innovative Drugs Research, College of Pharmacy, Jinan University, Guangzhou 510632, China; tangv163@163.com (W.T.); zhyxiaohuang@163.com (X.J.H.); songjianguof403@126.com (J.G.S.); liyueyue7991@163.com (Y.Y.L.); xyu0218@163.com (Y.X.); jnuchunlin@163.com (C.L.F.); chywc@aliyun.com (W.C.Y.)

<sup>3</sup> Guangdong Province Key Laboratory of Pharmacodynamic Constituents of TCM and New Drugs Research, College of Pharmacy, Jinan University, Guangzhou 510632, China.

\* Correspondence: zhenlongwu@jnu.edu.cn (Z.L.W.); wangying\_cpu@163.com (Y.W.); Tel: +86-20-8522-1559 (Y.W.)

† These authors contributed equally to this work.

## List of Supplementary Materials

|                                                                                                                        |     |
|------------------------------------------------------------------------------------------------------------------------|-----|
| Table S1. $^{13}\text{C}$ NMR spectroscopic data of compounds <b>1–10</b> ( $\delta$ in ppm). .....                    | S3  |
| Table S2. $^1\text{H}$ NMR spectroscopic data of compounds <b>1–5</b> ( $\delta$ in ppm, $J$ in Hz). .....             | S4  |
| Table S3. $^1\text{H}$ NMR spectroscopic data of compounds <b>6–10</b> ( $\delta$ in ppm, $J$ in Hz) .....             | S5  |
| Table S4. $^1\text{H}$ and $^{13}\text{C}$ NMR spectroscopic data for <b>11–14</b> ( $\delta$ in ppm, $J$ in Hz) ..... | S6  |
| Table S5. Anti-proliferation activities of quassinoids on human leukemia cell lines..                                  | S7  |
| 1. X-ray crystallographic analysis of <b>1</b> .....                                                                   | S8  |
| 2. X-ray crystallographic analysis of <b>2</b> .....                                                                   | S10 |
| 3. X-ray crystallographic analysis of <b>3</b> .....                                                                   | S13 |
| 4. X-ray crystallographic analysis of <b>4</b> .....                                                                   | S15 |
| 5. X-ray crystallographic analysis of <b>5</b> .....                                                                   | S17 |
| 6. X-ray crystallographic analysis of <b>6</b> .....                                                                   | S18 |
| 7. X-ray crystallographic analysis of <b>7</b> .....                                                                   | S20 |
| 8. X-ray crystallographic analysis of <b>8</b> .....                                                                   | S23 |
| 9. X-ray crystallographic analysis of <b>9</b> .....                                                                   | S25 |
| 10. X-ray crystallographic analysis of <b>10</b> .....                                                                 | S27 |
| 11. UV, IR, HR-ESI-MS, and NMR spectra of <b>1–14</b> .....                                                            | S29 |

**Table S1. <sup>13</sup>C NMR spectroscopic data of compounds 1–10 (δ in ppm).**

| No. | 1 <sup>a</sup> | 2 <sup>b</sup> | 3 <sup>b</sup> | 4 <sup>c</sup> | 5 <sup>c</sup> | 6 <sup>d</sup> | 7 <sup>a</sup> | 8 <sup>e</sup> | 9 <sup>a</sup> | 10 <sup>a</sup> |
|-----|----------------|----------------|----------------|----------------|----------------|----------------|----------------|----------------|----------------|-----------------|
| 1   | 83.5           | 84.0           | 77.5           | 82.0           | 84.6           | 85.5           | 84.1           | 83.2           | 82.8           | 79.2            |
| 2   | 199.7          | 200.4          | 132.7          | 198.2          | 197.2          | 71.6           | 72.3           | 197.0          | 72.5           | 70.6            |
| 3   | 125.6          | 125.1          | 130.2          | 124.4          | 125.0          | 44.3           | 127.6          | 126.6          | 127.4          | 127.3           |
| 4   | 163.3          | 165.2          | 145.8          | 164.4          | 163.2          | 147.4          | 134.9          | 161.7          | 134.2          | 133.9           |
| 5   | 47.9           | 44.6           | 39.7           | 43.5           | 42.5           | 42.5           | 42.8           | 43.3           | 42.5           | 47.6            |
| 6   | 31.7           | 24.8           | 26.9           | 25.7           | 25.1           | 27.1           | 25.5           | 27.4           | 27.5           | 32.7            |
| 7   | 111.0          | 84.4           | 83.6           | 77.4           | 82.2           | 75.7           | 73.9           | 74.8           | 75.4           | 79.2            |
| 8   | 52.5           | 43.3           | 37.6           | 38.8           | 42.6           | 53.6           | 51.4           | 47.8           | 47.9           | 47.4            |
| 9   | 47.8           | 43.5           | 43.7           | 45.1           | 48.0           | 48.8           | 46.6           | 53.4           | 53.7           | 53.3            |
| 10  | 48.8           | 49.1           | 44.7           | 47.6           | 46.2           | 42.2           | 42.3           | 49.2           | 46.0           | 41.5            |
| 11  | 69.5           | 74.4           | 69.6           | 73.7           | 210.2          | 111.0          | 111.1          | 74.9           | 75.3           | 75.5            |
| 12  | 85.5           | 75.8           | 75.9           | 75.4           | 82.4           | 80.0           | 81.8           | 176.4          | 176.6          | 176.2           |
| 13  | 29.9           | 28.6           | 32.0           | 29.4           | 36.2           | 42.8           | 33.3           | 54.0           | 54.2           | 55.8            |
| 14  | 82.9           | 63.2           | 46.1           | 67.9           | 52.4           | 76.9           | 78.6           | 79.9           | 79.9           | 81.2            |
| 15  | 82.7           | 102.5          | 30.6           | 52.9           | 67.3           | 72.3           | 74.2           | 69.0           | 69.3           | 71.6            |
| 16  | 171.5          | 174.5          | 171.8          | 168.4          | 174.5          | 175.3          | 173.0          | 174.9          | 175.1          | 173.8           |
| 18  | 13.0           | 16.0           | 15.2           | 9.0            | 16.2           | 14.5           | 10.8           | 12.6           | 12.8           | 14.3            |
| 19  | 12.9           | 11.9           | 11.4           | 11.9           | 9.9            | 12.3           | 10.7           | 9.2            | 9.5            | 16.3            |
| 29  | 21.6           | 22.5           | 111.3          | 22.7           | 22.6           | 110.1          | 21.9           | 22.7           | 21.8           | 22.2            |
| 30  | 12.8           | 23.1           | 22.5           | 20.6           | 23.1           | 67.8           | 72.2           | 68.7           | 69.0           | 71.7            |
| 1'  |                | 52.7           |                |                |                |                |                |                |                |                 |

<sup>a</sup> Measured in C<sub>5</sub>D<sub>5</sub>N, 125 MHz for <sup>13</sup>C NMR. <sup>b</sup> Measured in C<sub>5</sub>D<sub>5</sub>N, 150 MHz for <sup>13</sup>C NMR. <sup>c</sup> Measured in CDCl<sub>3</sub>, 100 MHz for <sup>13</sup>C NMR. <sup>d</sup> Measured in C<sub>5</sub>D<sub>5</sub>N, 75 MHz for <sup>13</sup>C NMR. <sup>e</sup> Measured in C<sub>5</sub>D<sub>5</sub>N, 100 MHz for <sup>13</sup>C NMR.

Table S2. <sup>1</sup>H NMR spectroscopic data of compounds 1–5 (δ in ppm, *J* in Hz) <sup>a</sup>.

| No.   | 1 <sup>b</sup>                             | 2 <sup>c</sup>                      | 3 <sup>c</sup>                    | 4 <sup>d</sup>                   | 5 <sup>d</sup>                      |
|-------|--------------------------------------------|-------------------------------------|-----------------------------------|----------------------------------|-------------------------------------|
| 1     | 4.00, s                                    | 4.20, s                             | 4.34, s                           | 4.01, s                          | 3.98, s                             |
| 2     |                                            |                                     | 5.76, d (9.6)                     |                                  |                                     |
| 3     | 6.07, br s                                 | 6.11, s                             | 6.31, d (9.6)                     | 6.08, br s                       | 6.06, br s                          |
| 5     | 2.92, m                                    | 3.20, d (13.0)                      | 2.75                              | 2.89, d (11.8)                   | 2.95, d (12.1)                      |
| 6     | α 2.59, dd (14.0, 4.0)<br>β 2.24, t (14.0) | α 2.29, dt (14.6, 3.2)<br>β 1.86, m | α 1.96, m<br>β 2.09               | α 2.23, dt (14.8, 3.0)<br>β 2.01 | α 2.23, dt (14.5, 3.3)<br>β 2.03, m |
| 7     |                                            | 3.97, m                             | 4.20, m                           | 4.34, t (3.0)                    | 4.50, m                             |
| 9     | 2.11, d (2.3)                              | 2.76, br s                          | 2.35, d (10.3)                    | 2.04                             | 3.72, s                             |
| 11    | 5.45, m                                    | 5.72                                | 4.17                              | 4.84, br s                       |                                     |
| 12    | 4.72, dd (4.6, 1.8)                        | 4.10, m                             | 4.17                              | 3.92, m                          | 3.94, d (2.7)                       |
| 13    | 3.17, qd (7.2, 1.8)                        | 2.94                                | 2.09                              | 2.83, qd (7.0, 2.3)              | 2.37, m                             |
| 14    |                                            | 2.95                                | 1.57, m                           |                                  | 1.81                                |
| 15    | 5.13, s                                    |                                     | α 4.06, dd (19.2, 11.6)<br>β 2.76 | 3.63, s                          | 5.42, d (10.1)                      |
| 18    | 1.34, d (7.2)                              | 1.48, d (6.5)                       | 1.17, d (7.0)                     | 0.89, d (7.0)                    | 1.33, d (7.3)                       |
| 19    | 1.39, s                                    | 1.38, s                             | 1.10, s                           | 1.11, s                          | 1.22, s                             |
| 29    | 1.70, s                                    | 1.77, s                             | a 5.00, s<br>b 4.87, s            | 1.96, s                          | 1.96, s                             |
| 30    | 1.96, s                                    | 1.77, s                             | 1.11, s                           | 1.58, s                          | 1.17, s                             |
| 1'    |                                            | 3.83, s                             |                                   |                                  |                                     |
| 11-OH | 6.89, d (5.7)                              |                                     |                                   |                                  |                                     |
| 14-OH | 7.05, s                                    |                                     |                                   |                                  |                                     |

<sup>a</sup> Overlapped signals were reported without designating multiplicity. <sup>b</sup> Measured in C<sub>5</sub>D<sub>5</sub>N, 500 MHz for <sup>1</sup>H NMR. <sup>c</sup> Measured in C<sub>5</sub>D<sub>5</sub>N, 600 MHz for <sup>1</sup>H NMR. <sup>d</sup> Measured in CDCl<sub>3</sub>, 400 MHz for <sup>1</sup>H NMR.



Table S3. <sup>1</sup>H NMR spectroscopic data of compounds 6–10 (δ in ppm, *J* in Hz) <sup>a</sup>.

| No.   | 6 <sup>b</sup>   | 7 <sup>c</sup>          | 8 <sup>d</sup>   | 9 <sup>c</sup>                | 10 <sup>c</sup>  |
|-------|------------------|-------------------------|------------------|-------------------------------|------------------|
| 1     | 3.88, d (8.6)    | 4.03                    | 4.47, s          | 4.03, d (7.5)                 | 4.12, d (7.8)    |
| 2     | 4.10, m          | 4.63, br s              |                  | 4.55                          | 4.47             |
| 3     | α 2.38, t (11.9) | 5.81, br s              | 6.10, s          | 5.76, br s                    | 5.77, s          |
|       | β 2.87           |                         |                  |                               |                  |
| 5     | 2.74             | 2.68, d (13.7)          | 3.17, d (12.5)   | 2.76, d (13.6)                | 2.30             |
| 6     | 2.13             | α 2.23, dt (15.0, 2.1)  | α 2.36, d (15.2) | α 2.20, dt (15.1, 2.8)        | α 2.09, m        |
|       |                  | β 2.05, td (15.0, 13.7) | β 2.22, m        | β 2.04, ddd (15.1, 13.6, 2.8) | β 2.33, m        |
| 7     | 5.23, s          | 5.10, d (4.6)           | 4.65, br s       | 4.55                          | 4.47             |
| 9     | 3.34, s          | 3.64, s                 | 3.33, s          | 3.02, s                       | 3.40, s          |
| 12    | 4.16, d (3.6)    | 4.20, br s              |                  |                               |                  |
| 13    | 2.90             | 3.08, m                 | 2.95, q (7.3)    | 2.92, q (7.5)                 | 3.01, q (7.4)    |
| 15    | 5.61, s          | 4.97, s                 | 5.44, s          | 5.40, s                       | 5.26, s          |
| 18    | 1.85, d (7.0)    | 1.32, d (6.9)           | 1.74, d (7.3)    | 1.72, d (7.5)                 | 1.87, d (7.4)    |
| 19    | 1.67, s          | 1.67, s                 | 1.33, s          | 1.45, s                       | 1.50, s          |
| 29    | a 4.98, s        | 1.66, s                 | 1.80, s          | 1.63, s                       | 1.72, s          |
|       | b 4.74, s        |                         |                  |                               |                  |
| 30    | a 4.67, d (8.8)  | a 4.87, dd (9.6, 1.7)   | a 5.63, d (12.2) | a 5.63, d (12.2)              | a 5.50, d (11.3) |
|       | b 4.10, d (8.8)  | b 4.02                  | b 4.38, d (12.2) | b 4.37, d (12.2)              | b 4.53, d (11.3) |
| 14-OH |                  | 5.55, s                 |                  | 7.77, s                       | 8.48, s          |
| 15-OH |                  | 8.88, d (5.1)           |                  |                               |                  |

<sup>a</sup> Overlapped signals were reported without designating multiplicity. <sup>b</sup> Measured in C<sub>5</sub>D<sub>5</sub>N, 300 MHz for <sup>1</sup>H NMR. <sup>c</sup> Measured in C<sub>5</sub>D<sub>5</sub>N, 500 MHz for <sup>1</sup>H NMR. <sup>d</sup> Measured in C<sub>5</sub>D<sub>5</sub>N, 400 MHz for <sup>1</sup>H NMR.

Table S4. <sup>1</sup>H and <sup>13</sup>C NMR spectroscopic data for 11–14 (δ in ppm, J in Hz) <sup>a</sup>

| no. | <b>11<sup>b</sup></b> |                                  | <b>12<sup>c</sup></b> |                                           | <b>13<sup>d</sup></b> |                                     | <b>14<sup>e</sup></b> |                                                        |
|-----|-----------------------|----------------------------------|-----------------------|-------------------------------------------|-----------------------|-------------------------------------|-----------------------|--------------------------------------------------------|
|     | δ <sub>C</sub>        | δ <sub>H</sub>                   | δ <sub>C</sub>        | δ <sub>H</sub>                            | δ <sub>C</sub>        | δ <sub>H</sub>                      | δ <sub>C</sub>        | δ <sub>H</sub>                                         |
| 1   | 86.7                  | 3.27                             | 84.0                  | 3.87, d (2.4)                             | 82.7                  | 4.03, s                             | 84.9                  | 4.52, s                                                |
| 2   | 70.3                  | 4.01, m                          | 199.1                 |                                           | 198.2                 |                                     | 197.9                 |                                                        |
| 3   | 43.6                  | α 1.21<br>β 2.10, dt (12.8, 4.6) | 124.0                 | 6.02, br s                                | 124.4                 | 6.09, s                             | 126.4                 | 6.16, br s                                             |
| 4   | 28.8                  | 1.52, m                          | 165.1                 |                                           | 164.5                 |                                     | 162.9                 |                                                        |
| 5   | 44.4                  | 1.37, m                          | 42.5                  | 2.86, d (12.1)                            | 43.6                  | 2.88, d (13.7)                      | 42.5                  | 3.26, d (12.5)                                         |
| 6   | 26.5                  | α 1.62, d (13.6)<br>β 1.86       | 25.1                  | α 2.01, m<br>β 2.11, td (14.5, 12.4, 2.0) | 26.1                  | α 2.29, dt (14.4, 2.9)<br>β 2.10, m | 26.0                  | α 2.33, dt (15.1, 2.9)<br>β 2.02, td (15.1, 12.5, 2.9) |
| 7   | 83.3                  | 4.36, br s                       | 81.9                  | 4.24, s                                   | 81.5                  | 4.63, t (3.0)                       | 72.1                  | 5.26, t (2.9)                                          |
| 8   | 41.1                  |                                  | 37.3                  |                                           | 48.2                  |                                     | 52.9                  |                                                        |
| 9   | 53.7                  | 3.12, s                          | 40.3                  | 1.80, d (2.4)                             | 45.0                  | 2.11                                | 48.1                  | 3.82, s                                                |
| 10  | 42.9                  |                                  | 47.9                  |                                           | 43.1                  |                                     | 46.3                  |                                                        |
| 11  | 212.6                 |                                  | 72.2                  | 4.84, m                                   | 73.7                  | 4.90, t (2.8)                       | 109.9                 |                                                        |
| 12  | 78.5                  | 4.47, d (11.0)                   | 75.3                  | 3.35, m                                   | 77.0                  | 3.90, t (2.6)                       | 81.3                  | 4.81, s                                                |
| 13  | 41.8                  | 2.27, dq (11.0, 6.8)             | 26.3                  | 2.34, ddd (7.3, 5.0, 2.4)                 | 35.9                  | 2.43, qd (7.3, 3.2)                 | 148.4                 |                                                        |
| 14  | 45.5                  | 1.87                             | 55.0                  | 1.51, t (5.7)                             | 75.9                  |                                     | 79.8                  |                                                        |
| 15  | 28.6                  | α 3.27<br>β 2.90, dd (18.7, 6.5) | 65.3                  | 4.76, t (6.2)                             | 71.2                  | 5.36, s                             | 76.2                  | 5.67, s                                                |
| 16  | 170.5                 |                                  | 172.7                 |                                           | 175.9                 |                                     | 174.3                 |                                                        |
| 18  | 15.7                  | 1.23, d (6.8)                    | 16.4                  | 1.04, d (7.3)                             | 12.5                  | 1.23, d (7.3)                       | 119.7                 | a 6.12, d (1.8)<br>b 5.65, d (1.8)                     |
| 19  | 12.3                  | 1.59, s                          | 11.7                  | 1.07, s                                   | 12.4                  | 1.18, s                             | 10.8                  | 1.62, s                                                |
| 29  | 20.1                  | 0.77, d (6.3)                    | 22.1                  | 1.94, s                                   | 22.8                  | 1.97, s                             | 22.8                  | 1.78, s                                                |
| 30  | 23.5                  | 1.12, s                          | 24.5                  | 1.42, s                                   | 17.4                  | 1.52, s                             | 68.0                  | a 4.55, d (8.6)<br>b 4.02, d (8.6)                     |

<sup>a</sup> Overlapped signals were reported without designating multiplicity. <sup>b</sup> Measured in C<sub>5</sub>D<sub>5</sub>N, 600 MHz for <sup>1</sup>H NMR, 150 MHz for <sup>13</sup>C NMR. <sup>c</sup> Measured in DMSO-*d*<sub>6</sub>, 300 MHz for <sup>1</sup>H NMR, 75 MHz for <sup>13</sup>C NMR. <sup>d</sup> Measured in CDCl<sub>3</sub>, 400 MHz for <sup>1</sup>H NMR, 100 MHz for <sup>13</sup>C NMR. <sup>e</sup> Measured in C<sub>5</sub>D<sub>5</sub>N, 300 MHz for <sup>1</sup>H NMR, 75 MHz for <sup>13</sup>C NMR.

**Table S5. Anti-proliferation activities of quassinoids on human leukemia cell lines.**

| <b>Compound</b> | <b>K562 (IC<sub>50</sub>, <math>\mu</math>M) <sup>a</sup></b> | <b>HL-60 (IC<sub>50</sub>, <math>\mu</math>M) <sup>a</sup></b> |
|-----------------|---------------------------------------------------------------|----------------------------------------------------------------|
| <b>1</b>        | >10                                                           | >10                                                            |
| <b>2</b>        | >10                                                           | >10                                                            |
| <b>3</b>        | >10                                                           | >10                                                            |
| <b>4</b>        | >10                                                           | >10                                                            |
| <b>5</b>        | 6.33 $\pm$ 0.35                                               | 4.77 $\pm$ 0.47                                                |
| <b>6</b>        | >10                                                           | >10                                                            |
| <b>7</b>        | >10                                                           | >10                                                            |
| <b>8</b>        | >10                                                           | >10                                                            |
| <b>9</b>        | >10                                                           | >10                                                            |
| <b>10</b>       | >10                                                           | >10                                                            |
| <b>11</b>       | >10                                                           | >10                                                            |
| <b>12</b>       | 4.31 $\pm$ 0.23                                               | 2.90 $\pm$ 0.35                                                |
| <b>13</b>       | 3.23 $\pm$ 0.12                                               | 3.50 $\pm$ 0.57                                                |
| <b>14</b>       | 8.20 $\pm$ 0.85                                               | 5.97 $\pm$ 0.55                                                |

<sup>a</sup>IC<sub>50</sub> is the concentration of compounds that inhibited 50% cell proliferation.

Data are mean  $\pm$  s.d., *n* = 3 biological replicates.

## 1. X-ray crystallographic analysis of 1

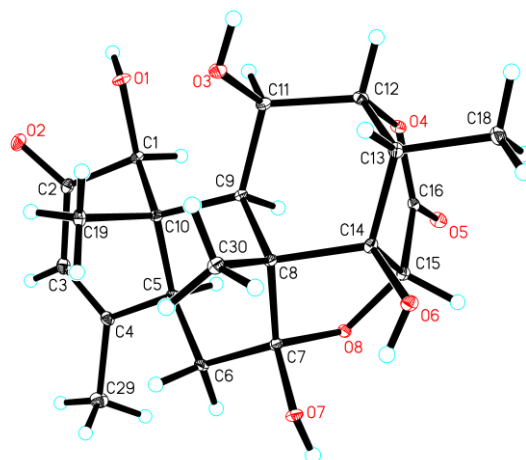

**Figure S1.** X-ray structure of **1**.

Colorless needles of **1** were obtained in methanol solvent. The crystal data was collected using an Oxford-Diffraction SuperNova diffractometer with Cu K $\alpha$  radiation. The crystal structure was solved by direct methods using the SHELXS program and refined by the SHELXL-2018 program and full-matrix least-squares calculation. Crystallographic data for compound **1** have been deposited with the Cambridge Crystallographic Data Centre (CCDC 2105724).

**Table S2. Crystal data and structure refinement for 1.**

|                   |                                                |
|-------------------|------------------------------------------------|
| Empirical formula | C <sub>20</sub> H <sub>26</sub> O <sub>8</sub> |
| Formula weight    | 394.41                                         |
| Temperature/K     | 99.99(10)                                      |
| Crystal system    | orthorhombic                                   |
| Space group       | P2 <sub>1</sub> 2 <sub>1</sub> 2 <sub>1</sub>  |
| a/Å               | 7.17350(10)                                    |

|                                                |                                                               |
|------------------------------------------------|---------------------------------------------------------------|
| b/Å                                            | 10.18810(10)                                                  |
| c/Å                                            | 24.5189(2)                                                    |
| $\alpha/^\circ$                                | 90                                                            |
| $\beta/^\circ$                                 | 90                                                            |
| $\gamma/^\circ$                                | 90                                                            |
| Volume/Å <sup>3</sup>                          | 1791.95(3)                                                    |
| Z                                              | 4                                                             |
| $\rho_{\text{calc}}/\text{g}/\text{cm}^3$      | 1.462                                                         |
| $\mu/\text{mm}^{-1}$                           | 0.948                                                         |
| F(000)                                         | 840.0                                                         |
| Crystal size/mm <sup>3</sup>                   | 0.14 × 0.13 × 0.12                                            |
| Radiation                                      | CuK $\alpha$ ( $\lambda$ = 1.54184)                           |
| 2 $\Theta$ range for data collection/ $^\circ$ | 7.21 to 147.054                                               |
| Index ranges                                   | $-8 \leq h \leq 8, -12 \leq k \leq 12, -29 \leq l \leq 30$    |
| Reflections collected                          | 21948                                                         |
| Independent reflections                        | 3593 [ $R_{\text{int}} = 0.0301, R_{\text{sigma}} = 0.0140$ ] |
| Data/restraints/parameters                     | 3593/0/261                                                    |
| Goodness-of-fit on $F^2$                       | 1.115                                                         |
| Final R indexes [ $I \geq 2\sigma(I)$ ]        | $R_1 = 0.0306, wR_2 = 0.0806$                                 |
| Final R indexes [all data]                     | $R_1 = 0.0307, wR_2 = 0.0807$                                 |
| Largest diff. peak/hole / e Å <sup>-3</sup>    | 0.20/-0.41                                                    |

Flack parameter 0.06(4)

## 2. X-ray crystallographic analysis of **2**

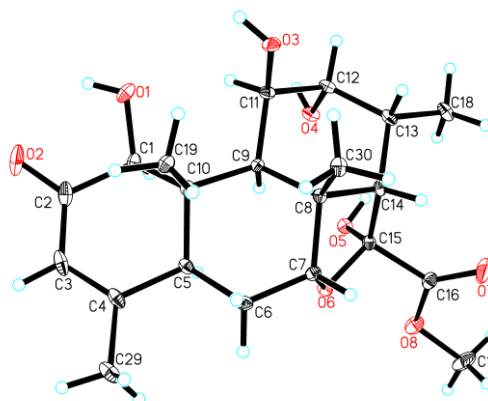

**Figure S2.** X-ray structure of **2**.

Colorless needles of **2** were obtained in methanol solvent. The crystal data was collected using an Oxford-Diffraction SuperNova diffractometer with Cu K $\alpha$  radiation. The crystal structure was solved by direct methods using the SHELXS program, and refined by the SHELXL-2018 program and full-matrix least-squares calculation. Crystallographic data for compound **2** have been deposited with the Cambridge Crystallographic Data Centre (CCDC 2105722).

**Table S3. Crystal data and structure refinement for 2.**

|                                         |                                                |
|-----------------------------------------|------------------------------------------------|
| Empirical formula                       | C <sub>21</sub> H <sub>30</sub> O <sub>8</sub> |
| Formula weight                          | 410.45                                         |
| Temperature/K                           | 100.00(10)                                     |
| Crystal system                          | monoclinic                                     |
| Space group                             | P2 <sub>1</sub>                                |
| a/Å                                     | 8.0642(2)                                      |
| b/Å                                     | 10.6239(3)                                     |
| c/Å                                     | 11.9568(3)                                     |
| $\alpha$ /°                             | 90                                             |
| $\beta$ /°                              | 107.411(2)                                     |
| $\gamma$ /°                             | 90                                             |
| Volume/Å <sup>3</sup>                   | 977.44(5)                                      |
| Z                                       | 2                                              |
| $\rho_{\text{calc}}$ /g/cm <sup>3</sup> | 1.395                                          |
| $\mu$ /mm <sup>-1</sup>                 | 0.888                                          |
| F(000)                                  | 440.0                                          |
| Crystal size/mm <sup>3</sup>            | 0.14 × 0.12 × 0.11                             |
| Radiation                               | CuK $\alpha$ ( $\lambda$ = 1.54184)            |
| 2 $\Theta$ range for data collection    | 7.75 to 146.844                                |

Index ranges                       $-9 \leq h \leq 10, -12 \leq k \leq 13, -14 \leq l \leq 14$

Reflections collected            9576

Independent reflections        3595 [ $R_{\text{int}} = 0.0302, R_{\text{sigma}} = 0.0220$ ]

Data/restraints/parameters 3595/1/274

Goodness-of-fit on  $F^2$         1.068

Final R indexes [ $I \geq 2\sigma(I)$ ]  $R_1 = 0.0353, wR_2 = 0.0943$

Final R indexes [all data]  $R_1 = 0.0355, wR_2 = 0.0946$

Largest diff. peak/hole / e  
                                         0.23/-0.21

$\text{\AA}^{-3}$

Flack parameter                0.09(8)



### 3. X-ray crystallographic analysis of 3

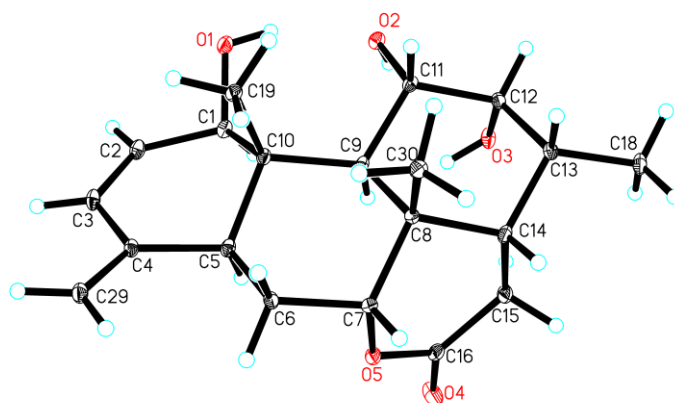

**Figure S3.** X-ray structure of **3**.

Colorless needles of **3** were obtained in methanol solvent. The crystal data was collected using an Oxford-Diffraction SuperNova diffractometer with Cu K $\alpha$  radiation. The crystal structure was solved by direct methods using the SHELXS program, and refined by the SHELXL-2018 program and full-matrix least-squares calculation. Crystallographic data for compound **3** have been deposited with the Cambridge Crystallographic Data Centre (CCDC 2105723).

**Table S4** Crystal data and structure refinement for **3**.

|                   |                                                |
|-------------------|------------------------------------------------|
| Empirical formula | C <sub>20</sub> H <sub>30</sub> O <sub>6</sub> |
| Formula weight    | 366.44                                         |
| Temperature/K     | 293(2)                                         |
| Crystal system    | monoclinic                                     |
| Space group       | P2 <sub>1</sub>                                |
| a/Å               | 7.0067(2)                                      |
| b/Å               | 13.4001(4)                                     |

|                                                                |                                                               |
|----------------------------------------------------------------|---------------------------------------------------------------|
| $c/\text{\AA}$                                                 | 9.7581(3)                                                     |
| $\alpha/^\circ$                                                | 90                                                            |
| $\beta/^\circ$                                                 | 90.421(2)                                                     |
| $\gamma/^\circ$                                                | 90                                                            |
| Volume/ $\text{\AA}^3$                                         | 916.17(5)                                                     |
| Z                                                              | 2                                                             |
| $\rho_{\text{calc}}/\text{g}/\text{cm}^3$                      | 1.328                                                         |
| $\mu/\text{mm}^{-1}$                                           | 0.795                                                         |
| F(000)                                                         | 396.0                                                         |
| Crystal size/ $\text{mm}^3$                                    | $? \times ? \times ?$                                         |
| Radiation                                                      | $\text{CuK}\alpha$ ( $\lambda = 1.54184$ )                    |
| $2\Theta$ range for data collection/ $^\circ$ 9.062 to 147.176 |                                                               |
| Index ranges                                                   | $-8 \leq h \leq 8, -16 \leq k \leq 16, -11 \leq l \leq 12$    |
| Reflections collected                                          | 8696                                                          |
| Independent reflections                                        | 3440 [ $R_{\text{int}} = 0.0639, R_{\text{sigma}} = 0.0435$ ] |
| Data/restraints/parameters                                     | 3440/1/244                                                    |
| Goodness-of-fit on $F^2$                                       | 1.039                                                         |
| Final R indexes [ $I \geq 2\sigma(I)$ ]                        | $R_1 = 0.0355, wR_2 = 0.0891$                                 |
| Final R indexes [all data]                                     | $R_1 = 0.0373, wR_2 = 0.0908$                                 |
| Largest diff. peak/hole / $e \text{\AA}^{-3}$ 0.18/-0.26       |                                                               |
| Flack parameter                                                | 0.09(9)                                                       |

#### 4. X-ray crystallographic analysis of **4**

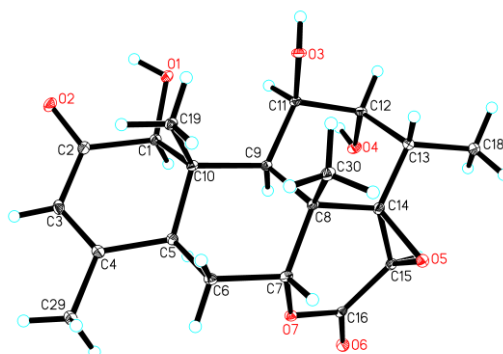

**Figure S4.** X-ray structure of **4**.

Colorless needles of **4** were obtained in methanol solvent. The crystal data was collected using an Oxford-Diffraction SuperNova diffractometer with Cu K $\alpha$  radiation. The crystal structure was solved by direct methods using the SHELXS program, and refined by the SHELXL-2018 program and full-matrix least-squares calculation. Crystallographic data for compound **4** have been deposited with the Cambridge Crystallographic Data Centre (CCDC 2105731).

**Table S5. Crystal data and structure refinement for **4**.**

|                   |                                                |
|-------------------|------------------------------------------------|
| Empirical formula | C <sub>20</sub> H <sub>26</sub> O <sub>7</sub> |
| Formula weight    | 378.41                                         |
| Temperature/K     | 100.00(10)                                     |
| Crystal system    | orthorhombic                                   |
| Space group       | P2 <sub>1</sub> 2 <sub>1</sub> 2 <sub>1</sub>  |
| a/Å               | 9.63490(10)                                    |
| b/Å               | 12.0407(2)                                     |

|                                               |                                                               |
|-----------------------------------------------|---------------------------------------------------------------|
| $c/\text{\AA}$                                | 15.6703(2)                                                    |
| $\alpha/^\circ$                               | 90                                                            |
| $\beta/^\circ$                                | 90                                                            |
| $\gamma/^\circ$                               | 90                                                            |
| Volume/ $\text{\AA}^3$                        | 1817.93(4)                                                    |
| Z                                             | 4                                                             |
| $\rho_{\text{calc}}/\text{g}/\text{cm}^3$     | 1.383                                                         |
| $\mu/\text{mm}^{-1}$                          | 0.868                                                         |
| F(000)                                        | 808.0                                                         |
| Crystal size/ $\text{mm}^3$                   | $0.14 \times 0.12 \times 0.11$                                |
| Radiation                                     | $\text{CuK}\alpha$ ( $\lambda = 1.54184$ )                    |
| $2\Theta$ range for data collection           | 9.262 to 146.826                                              |
| Index ranges                                  | $-11 \leq h \leq 11, -12 \leq k \leq 14, -19 \leq l \leq 19$  |
| Reflections collected                         | 14343                                                         |
| Independent reflections                       | 3607 [ $R_{\text{int}} = 0.0285, R_{\text{sigma}} = 0.0201$ ] |
| Data/restraints/parameters                    | 3607/0/251                                                    |
| Goodness-of-fit on $F^2$                      | 1.042                                                         |
| Final R indexes [ $I \geq 2\sigma(I)$ ]       | $R_1 = 0.0284, wR_2 = 0.0741$                                 |
| Final R indexes [all data]                    | $R_1 = 0.0290, wR_2 = 0.0746$                                 |
| Largest diff. peak/hole / $e \text{\AA}^{-3}$ | 0.22/-0.20                                                    |
| Flack parameter                               | -0.05(6)                                                      |

## 5. X-ray crystallographic analysis of 5

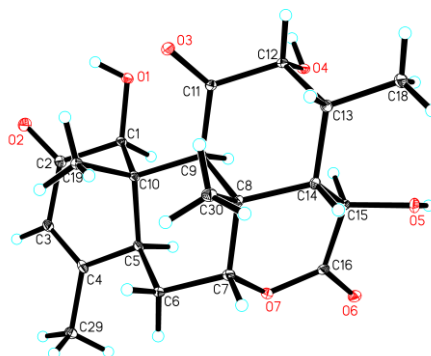

**Figure S5.** X-ray structure of **5**.

Colorless needles of **5** were obtained in methanol/pyridine mixed solvent. The crystal data was collected using an Oxford-Diffraction SuperNova diffractometer with Cu K $\alpha$  radiation. The crystal structure was solved by direct methods using the SHELXS program, and refined by the SHELXL-2018 program and full-matrix least-squares calculation. Crystallographic data for compound **5** have been deposited with the Cambridge Crystallographic Data Centre (CCDC 2105730).

**Table S6. Crystal data and structure refinement for 5.**

|                |              |
|----------------|--------------|
| Formula weight | 457.51       |
| Temperature/K  | 100.00(10)   |
| Crystal system | monoclinic   |
| Space group    | I2           |
| a/Å            | 7.84600(10)  |
| b/Å            | 12.85380(10) |
| c/Å            | 22.0124(2)   |
| $\alpha$ /°    | 90           |

|                                                                 |                                                               |
|-----------------------------------------------------------------|---------------------------------------------------------------|
| $\beta/^\circ$                                                  | 95.8390(10)                                                   |
| $\gamma/^\circ$                                                 | 90                                                            |
| Volume/ $\text{\AA}^3$                                          | 2208.45(4)                                                    |
| Z                                                               | 4                                                             |
| $\rho_{\text{calc}}/\text{g}/\text{cm}^3$                       | 1.376                                                         |
| $\mu/\text{mm}^{-1}$                                            | 0.828                                                         |
| F(000)                                                          | 976.0                                                         |
| Crystal size/ $\text{mm}^3$                                     | $0.14 \times 0.13 \times 0.11$                                |
| Radiation                                                       | CuK $\alpha$ ( $\lambda = 1.54184$ )                          |
| 2 $\Theta$ range for data collection/ $^\circ$ 7.976 to 147.044 |                                                               |
| Index ranges                                                    | $-9 \leq h \leq 9, -15 \leq k \leq 15, -27 \leq l \leq 27$    |
| Reflections collected                                           | 20973                                                         |
| Independent reflections                                         | 4407 [ $R_{\text{int}} = 0.0497, R_{\text{sigma}} = 0.0283$ ] |
| Data/restraints/parameters                                      | 4407/1/305                                                    |
| Goodness-of-fit on $F^2$                                        | 1.029                                                         |
| Final R indexes [ $I \geq 2\sigma(I)$ ]                         | $R_1 = 0.0334, wR_2 = 0.0879$                                 |
| Final R indexes [all data]                                      | $R_1 = 0.0336, wR_2 = 0.0884$                                 |
| Largest diff. peak/hole / $e \text{ \AA}^{-3}$                  | 0.22/-0.23                                                    |
| Flack parameter                                                 | 0.05(7)                                                       |

## 6. X-ray crystallographic analysis of 6

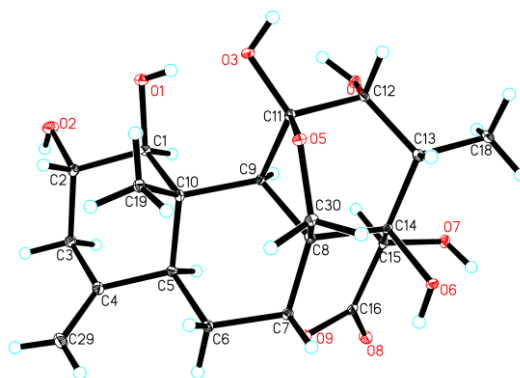

**Figure S6.** X-ray structure of **6**.

Colorless needles of **6** were obtained in methanol/pyridine mixed solvent. The crystal data was collected using an Oxford-Diffraction SuperNova diffractometer with Cu K $\alpha$  radiation. The crystal structure was solved by direct methods using the SHELXS program, and refined by the SHELXL-2018 program and full-matrix least-squares calculation. Crystallographic data for compound **6** have been deposited with the Cambridge Crystallographic Data Centre (CCDC 2105729).

**Table S7. Crystal data and structure refinement for 6.**

|                   |                                                 |
|-------------------|-------------------------------------------------|
| Empirical formula | C <sub>20</sub> H <sub>34</sub> O <sub>12</sub> |
| Formula weight    | 466.47                                          |
| Temperature/K     | 113(20)                                         |
| Crystal system    | orthorhombic                                    |
| Space group       | P2 <sub>1</sub> 2 <sub>1</sub> 2                |
| a/Å               | 13.8037(6)                                      |
| b/Å               | 12.1850(6)                                      |
| c/Å               | 12.0498(5)                                      |

|                                                                 |                                                               |
|-----------------------------------------------------------------|---------------------------------------------------------------|
| $\alpha/^\circ$                                                 | 90                                                            |
| $\beta/^\circ$                                                  | 90                                                            |
| $\gamma/^\circ$                                                 | 90                                                            |
| Volume/ $\text{\AA}^3$                                          | 2026.75(16)                                                   |
| Z                                                               | 4                                                             |
| $\rho_{\text{calc}}/\text{g}/\text{cm}^3$                       | 1.529                                                         |
| $\mu/\text{mm}^{-1}$                                            | 1.079                                                         |
| F(000)                                                          | 1000.0                                                        |
| Crystal size/ $\text{mm}^3$                                     | $? \times ? \times ?$                                         |
| Radiation                                                       | Cu K $\alpha$ ( $\lambda = 1.54184$ )                         |
| 2 $\Theta$ range for data collection/ $^\circ$ 7.336 to 147.508 |                                                               |
| Index ranges                                                    | $-17 \leq h \leq 11, -14 \leq k \leq 14, -14 \leq l \leq 10$  |
| Reflections collected                                           | 7421                                                          |
| Independent reflections                                         | 3904 [ $R_{\text{int}} = 0.0401, R_{\text{sigma}} = 0.0517$ ] |
| Data/restraints/parameters                                      | 3904/0/314                                                    |
| Goodness-of-fit on $F^2$                                        | 1.144                                                         |
| Final R indexes [ $I \geq 2\sigma(I)$ ]                         | $R_1 = 0.0503, wR_2 = 0.1441$                                 |
| Final R indexes [all data]                                      | $R_1 = 0.0530, wR_2 = 0.1464$                                 |
| Largest diff. peak/hole / $e \text{ \AA}^{-3}$                  | 0.46/-0.45                                                    |
| Flack parameter                                                 | -0.04(9)                                                      |

## 7. X-ray crystallographic analysis of 7



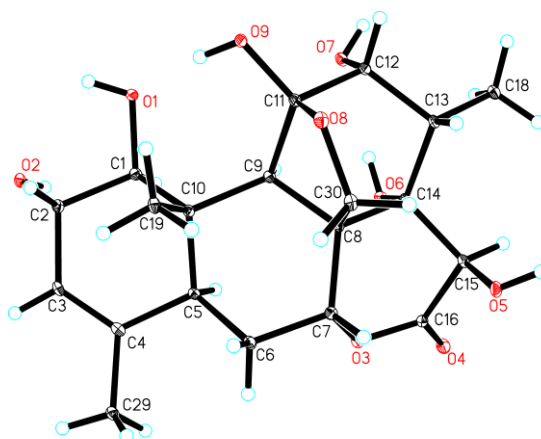

**Figure S7.** X-ray structure of **7**.

Colorless needles of **7** were obtained in methanol solvent. The crystal data was collected using an Oxford-Diffraction SuperNova diffractometer with Cu K $\alpha$  radiation. The crystal structure was solved by direct methods using the SHELXS program, and refined by the SHELXL-2018 program and full-matrix least-squares calculation. Crystallographic data for compound **7** have been deposited with the Cambridge Crystallographic Data Centre (CCDC 2105727).

**Table S8. Crystal data and structure refinement for **7**.**

|                   |                                                 |
|-------------------|-------------------------------------------------|
| Empirical formula | C <sub>20</sub> H <sub>30</sub> O <sub>10</sub> |
| Formula weight    | 430.44                                          |
| Temperature/K     | 100.00(10)                                      |
| Crystal system    | orthorhombic                                    |
| Space group       | P2 <sub>1</sub> 2 <sub>1</sub> 2 <sub>1</sub>   |
| a/Å               | 6.94750(10)                                     |
| b/Å               | 9.86740(10)                                     |

|                                                                |                                                               |
|----------------------------------------------------------------|---------------------------------------------------------------|
| $c/\text{\AA}$                                                 | 28.8229(4)                                                    |
| $\alpha/^\circ$                                                | 90                                                            |
| $\beta/^\circ$                                                 | 90                                                            |
| $\gamma/^\circ$                                                | 90                                                            |
| Volume/ $\text{\AA}^3$                                         | 1975.92(4)                                                    |
| Z                                                              | 4                                                             |
| $\rho_{\text{calc}}/\text{g}/\text{cm}^3$                      | 1.447                                                         |
| $\mu/\text{mm}^{-1}$                                           | 0.983                                                         |
| F(000)                                                         | 920.0                                                         |
| Crystal size/ $\text{mm}^3$                                    | $0.13 \times 0.12 \times 0.11$                                |
| Radiation                                                      | $\text{CuK}\alpha$ ( $\lambda = 1.54184$ )                    |
| $2\Theta$ range for data collection/ $^\circ$ 6.132 to 147.044 |                                                               |
| Index ranges                                                   | $-8 \leq h \leq 8, -12 \leq k \leq 12, -35 \leq l \leq 35$    |
| Reflections collected                                          | 22539                                                         |
| Independent reflections                                        | 3946 [ $R_{\text{int}} = 0.0695, R_{\text{sigma}} = 0.0368$ ] |
| Data/restraints/parameters                                     | 3946/0/283                                                    |
| Goodness-of-fit on $F^2$                                       | 1.059                                                         |
| Final R indexes [ $I \geq 2\sigma(I)$ ]                        | $R_1 = 0.0372, wR_2 = 0.0994$                                 |
| Final R indexes [all data]                                     | $R_1 = 0.0389, wR_2 = 0.1016$                                 |
| Largest diff. peak/hole / $e \text{\AA}^{-3}$ 0.28/-0.27       |                                                               |
| Flack parameter                                                | -0.12(9)                                                      |

## 8. X-ray crystallographic analysis of 8

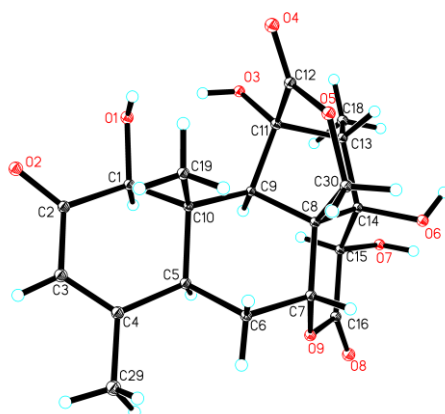

**Figure S8.** X-ray structure of 8.

Colorless needles of **8** were obtained in methanol solvent. The crystal data was collected using an Oxford-Diffraction SuperNova diffractometer with Cu K $\alpha$  radiation. The crystal structure was solved by direct methods using the SHELXS program, and refined by the SHELXL-2018 program and full-matrix least-squares calculation. Crystallographic data for compound **8** have been deposited with the Cambridge Crystallographic Data Centre (CCDC 2105725).

**Table S9. Crystal data and structure refinement for 8.**

|                   |                                                 |
|-------------------|-------------------------------------------------|
| Empirical formula | C <sub>20</sub> H <sub>32</sub> O <sub>13</sub> |
| Formula weight    | 480.45                                          |
| Temperature/K     | 100.01(10)                                      |
| Crystal system    | orthorhombic                                    |
| Space group       | P2 <sub>1</sub> 2 <sub>1</sub> 2 <sub>1</sub>   |
| a/Å               | 7.02070(10)                                     |
| b/Å               | 13.3311(2)                                      |

|                                                               |                                                               |
|---------------------------------------------------------------|---------------------------------------------------------------|
| $c/\text{\AA}$                                                | 22.4885(3)                                                    |
| $\alpha/^\circ$                                               | 90                                                            |
| $\beta/^\circ$                                                | 90                                                            |
| $\gamma/^\circ$                                               | 90                                                            |
| Volume/ $\text{\AA}^3$                                        | 2104.78(5)                                                    |
| Z                                                             | 4                                                             |
| $\rho_{\text{calc}}/\text{g/cm}^3$                            | 1.516                                                         |
| $\mu/\text{mm}^{-1}$                                          | 1.097                                                         |
| F(000)                                                        | 1024.0                                                        |
| Crystal size/ $\text{mm}^3$                                   | $0.9 \times 0.7 \times 0.5$                                   |
| Radiation                                                     | $\text{CuK}\alpha$ ( $\lambda = 1.54184$ )                    |
| $2\Theta$ range for data collection/ $^\circ$ 7.71 to 147.848 |                                                               |
| Index ranges                                                  | $-6 \leq h \leq 8, -16 \leq k \leq 16, -27 \leq l \leq 27$    |
| Reflections collected                                         | 20217                                                         |
| Independent reflections                                       | 4187 [ $R_{\text{int}} = 0.0429, R_{\text{sigma}} = 0.0296$ ] |
| Data/restraints/parameters                                    | 4187/0/317                                                    |
| Goodness-of-fit on $F^2$                                      | 1.040                                                         |
| Final R indexes [ $I \geq 2\sigma(I)$ ]                       | $R_1 = 0.0282, wR_2 = 0.0723$                                 |
| Final R indexes [all data]                                    | $R_1 = 0.0298, wR_2 = 0.0734$                                 |
| Largest diff. peak/hole / $e \text{\AA}^{-3}$ 0.25/-0.26      |                                                               |
| Flack parameter                                               | -0.01(6)                                                      |

## 9. X-ray crystallographic analysis of 9

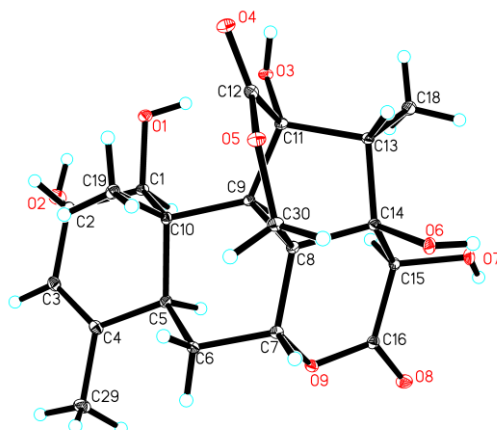

**Figure S9.** X-ray structure of **9**.

Colorless needles of **9** were obtained in methanol solvent. The crystal data was collected using an Oxford-Diffraction SuperNova diffractometer with Cu K $\alpha$  radiation. The crystal structure was solved by direct methods using the SHELXS program, and refined by the SHELXL-2018 program and full-matrix least-squares calculation. Crystallographic data for compound **9** have been deposited with the Cambridge Crystallographic Data Centre (CCDC 2105726).

**Table S10. Crystal data and structure refinement for 9.**

|                   |                                                |
|-------------------|------------------------------------------------|
| Empirical formula | C <sub>20</sub> H <sub>26</sub> O <sub>9</sub> |
| Formula weight    | 410.41                                         |
| Temperature/K     | 100.00(10)                                     |
| Crystal system    | monoclinic                                     |
| Space group       | C2                                             |
| a/Å               | 17.7027(6)                                     |
| b/Å               | 8.4150(3)                                      |

|                                                                |                                                               |
|----------------------------------------------------------------|---------------------------------------------------------------|
| $c/\text{\AA}$                                                 | 12.3274(3)                                                    |
| $\alpha/^\circ$                                                | 90                                                            |
| $\beta/^\circ$                                                 | 99.070(3)                                                     |
| $\gamma/^\circ$                                                | 90                                                            |
| Volume/ $\text{\AA}^3$                                         | 1813.43(10)                                                   |
| Z                                                              | 4                                                             |
| $\rho_{\text{calc}}/\text{g/cm}^3$                             | 1.503                                                         |
| $\mu/\text{mm}^{-1}$                                           | 1.004                                                         |
| F(000)                                                         | 872.0                                                         |
| Crystal size/ $\text{mm}^3$                                    | $0.9 \times 0.7 \times 0.5$                                   |
| Radiation                                                      | $\text{CuK}\alpha$ ( $\lambda = 1.54184$ )                    |
| $2\Theta$ range for data collection/ $^\circ$ 7.262 to 147.362 |                                                               |
| Index ranges                                                   | $-21 \leq h \leq 21, -10 \leq k \leq 10, -15 \leq l \leq 15$  |
| Reflections collected                                          | 16975                                                         |
| Independent reflections                                        | 3635 [ $R_{\text{int}} = 0.0514, R_{\text{sigma}} = 0.0313$ ] |
| Data/restraints/parameters                                     | 3635/1/270                                                    |
| Goodness-of-fit on $F^2$                                       | 1.149                                                         |
| Final R indexes [ $I \geq 2\sigma(I)$ ]                        | $R_1 = 0.0388, wR_2 = 0.1073$                                 |
| Final R indexes [all data]                                     | $R_1 = 0.0396, wR_2 = 0.1080$                                 |
| Largest diff. peak/hole / $e \text{\AA}^{-3}$ 0.67/-0.27       |                                                               |
| Flack parameter                                                | 0.10(9)                                                       |

## 10. X-ray crystallographic analysis of 10

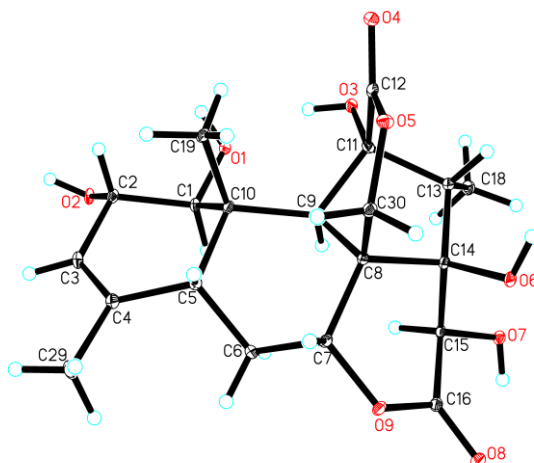

**Figure S10.** X-ray structure of **10**.

Colorless needles of **10** were obtained in methanol solvent. The crystal data was collected using an Oxford-Diffraction SuperNova diffractometer with Cu K $\alpha$  radiation. The crystal structure was solved by direct methods using the SHELXS program, and refined by the SHELXL-2018 program and full-matrix least-squares calculation. Crystallographic data for compound **10** have been deposited with the Cambridge Crystallographic Data Centre (CCDC 2105728).

**Table S11. Crystal data and structure refinement for 10.**

|                   |                                                 |
|-------------------|-------------------------------------------------|
| Empirical formula | C <sub>20</sub> H <sub>28</sub> O <sub>10</sub> |
| Formula weight    | 428.42                                          |
| Temperature/K     | 100.00(10)                                      |
| Crystal system    | orthorhombic                                    |
| Space group       | P2 <sub>1</sub> 2 <sub>1</sub> 2 <sub>1</sub>   |
| a/Å               | 7.2511(2)                                       |

|                                                                 |                                                                |
|-----------------------------------------------------------------|----------------------------------------------------------------|
| b/Å                                                             | 10.6856(3)                                                     |
| c/Å                                                             | 24.0611(9)                                                     |
| $\alpha/^\circ$                                                 | 90                                                             |
| $\beta/^\circ$                                                  | 90                                                             |
| $\gamma/^\circ$                                                 | 90                                                             |
| Volume/Å <sup>3</sup>                                           | 1864.31(10)                                                    |
| Z                                                               | 4                                                              |
| $\rho_{\text{calc}}/\text{g}/\text{cm}^3$                       | 1.526                                                          |
| $\mu/\text{mm}^{-1}$                                            | 1.042                                                          |
| F(000)                                                          | 912.0                                                          |
| Crystal size/mm <sup>3</sup>                                    | 0.9 × 0.7 × 0.5                                                |
| Radiation                                                       | CuK $\alpha$ ( $\lambda$ = 1.54184)                            |
| 2 $\Theta$ range for data collection/ $^\circ$ 7.348 to 147.984 |                                                                |
| Index ranges                                                    | -8 ≤ h ≤ 8, -13 ≤ k ≤ 13, -29 ≤ l ≤ 29                         |
| Reflections collected                                           | 17396                                                          |
| Independent reflections                                         | 3693 [ $R_{\text{int}}$ = 0.0511, $R_{\text{sigma}}$ = 0.0405] |
| Data/restraints/parameters                                      | 3693/0/282                                                     |
| Goodness-of-fit on F <sup>2</sup>                               | 1.082                                                          |
| Final R indexes [ $I \geq 2\sigma(I)$ ]                         | $R_1$ = 0.0375, $wR_2$ = 0.0878                                |
| Final R indexes [all data]                                      | $R_1$ = 0.0426, $wR_2$ = 0.0896                                |
| Largest diff. peak/hole / e Å <sup>-3</sup> 0.21/-0.24          |                                                                |



Flack parameter

0.07(10)

## 11. UV, IR, HR-ESI-MS, and NMR spectra of 1–14

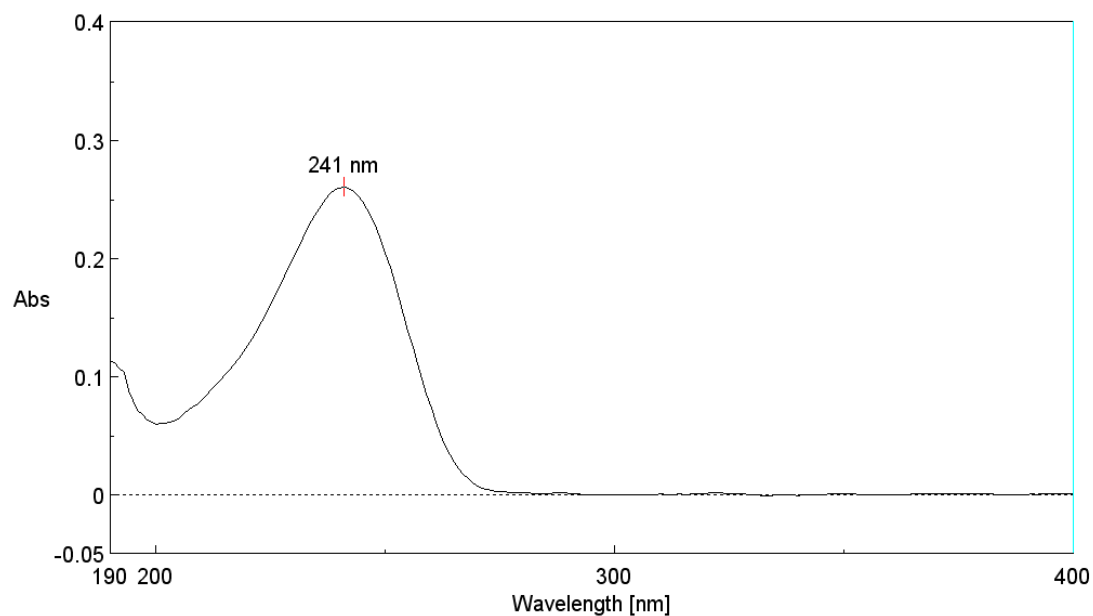

Figure S11. UV spectrum of compound 1

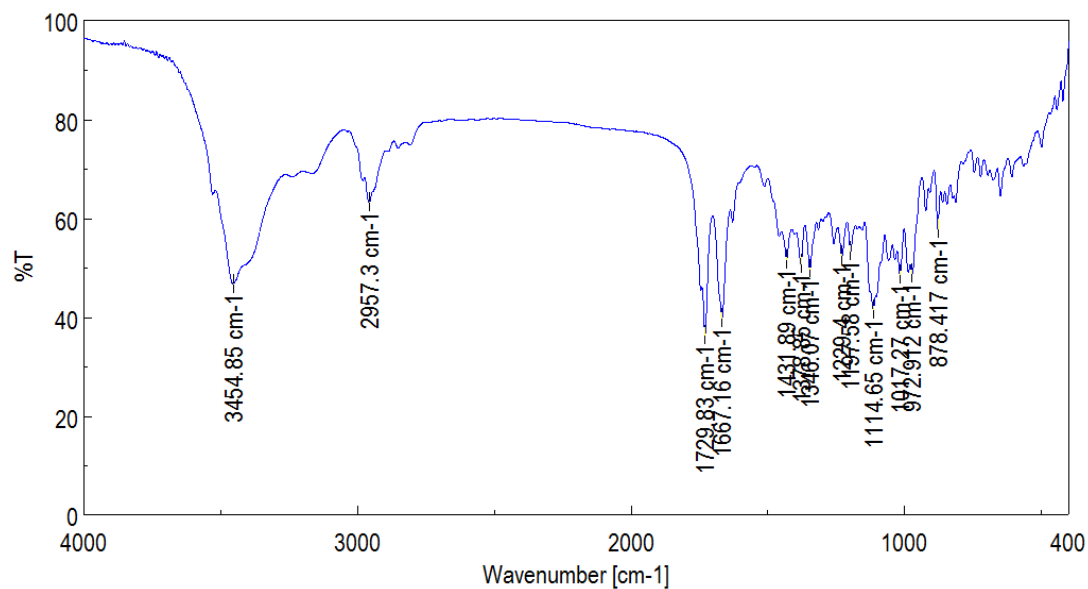

Figure S12. IR (KBr disc) spectrum of compound 1

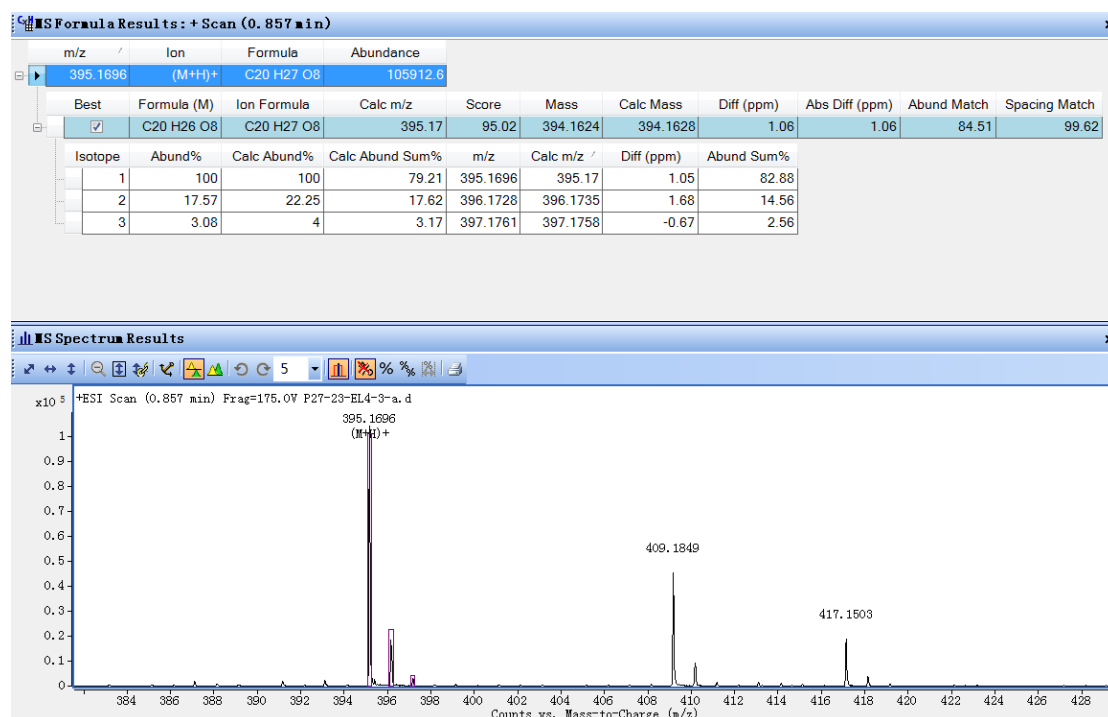

Figure S13. HR-ESI-MS spectrum of compound 1

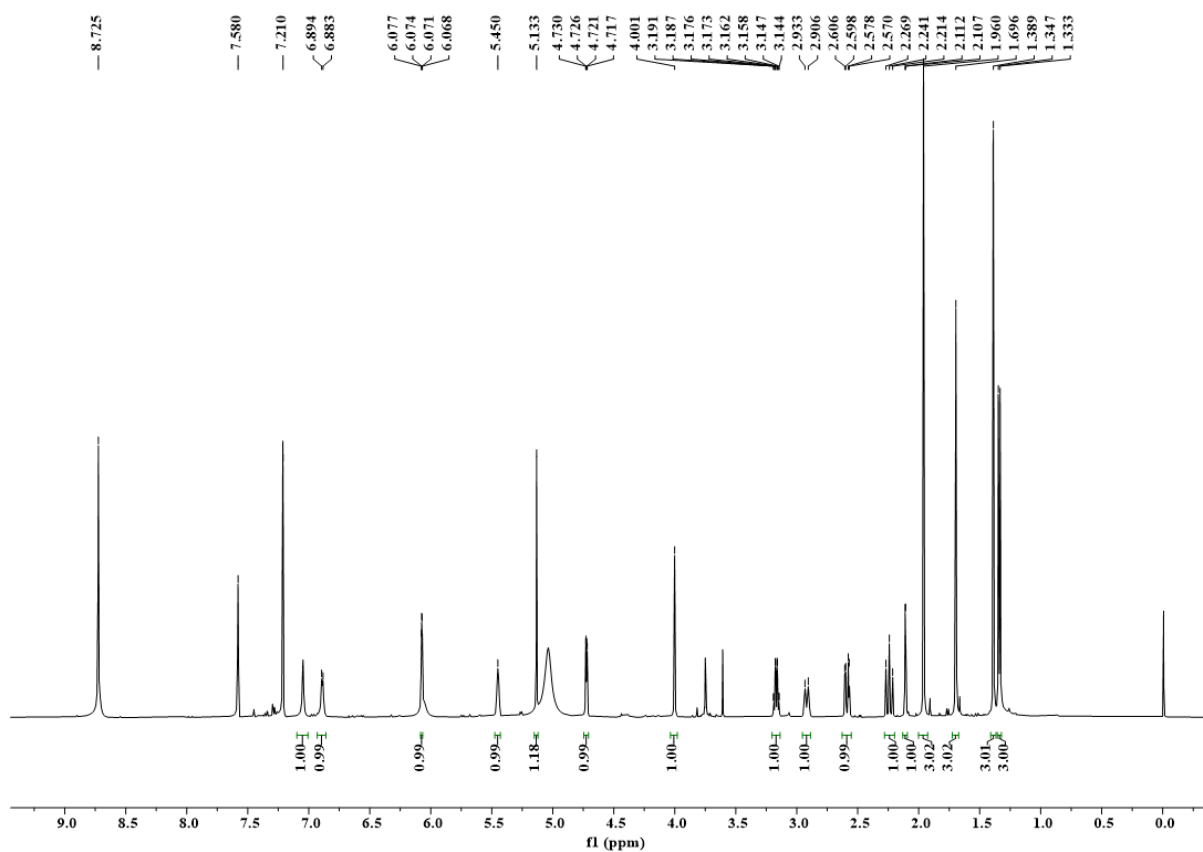

Figure S14. <sup>1</sup>H NMR spectrum of compound 1

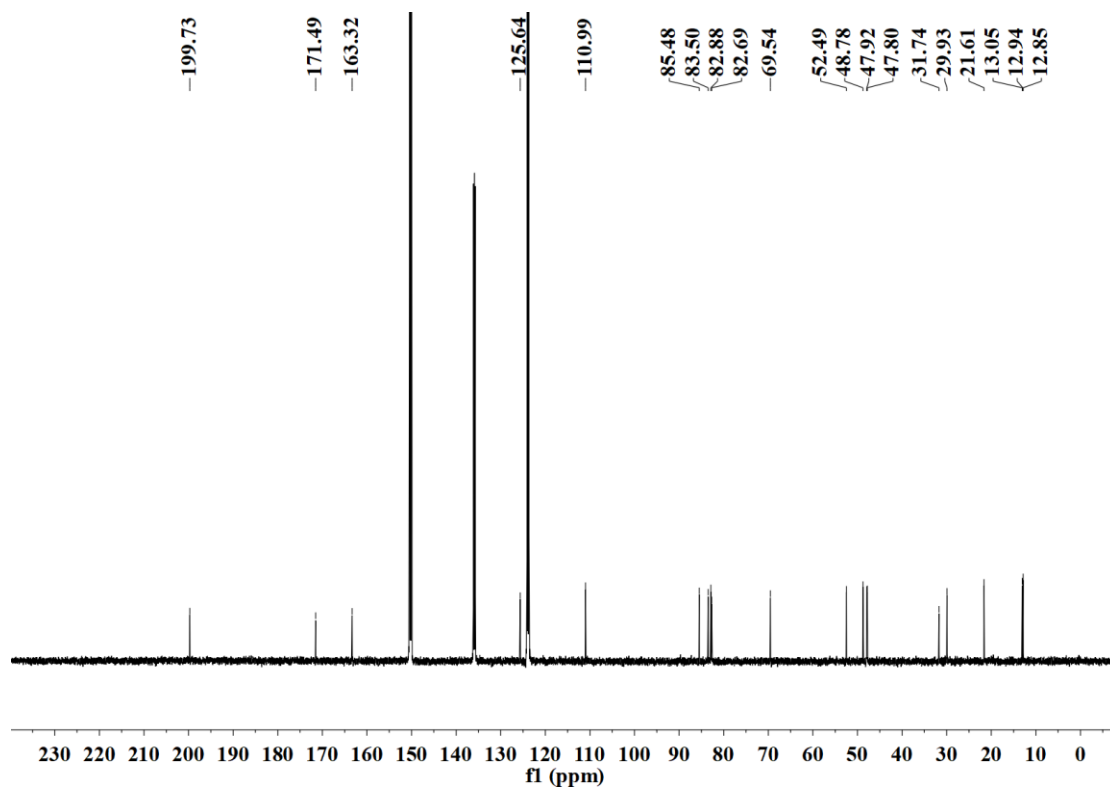

Figure S15. <sup>13</sup>C NMR spectrum of compound 1

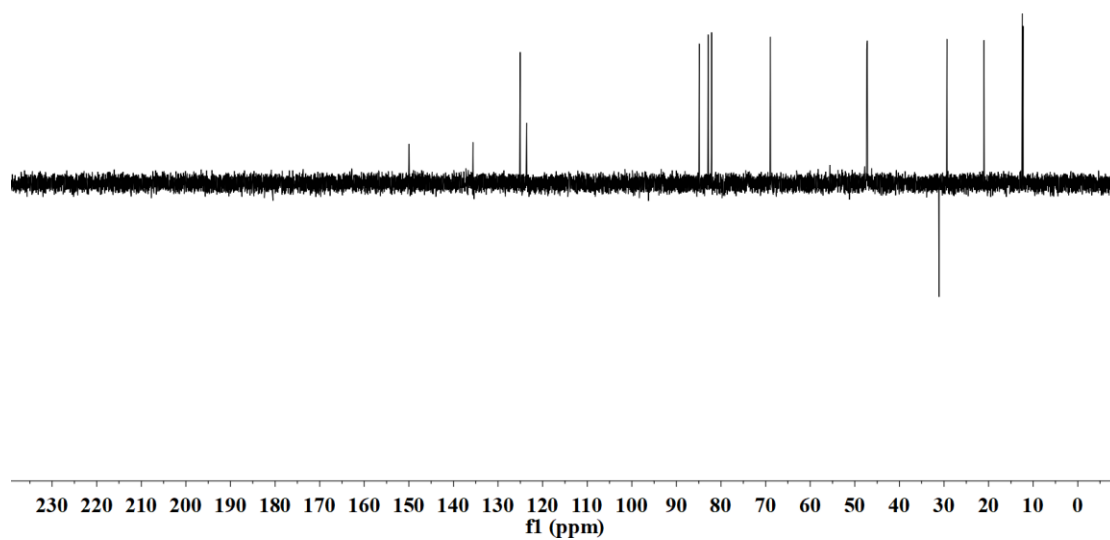

Figure S16. DEPT-135 spectrum of compound 1

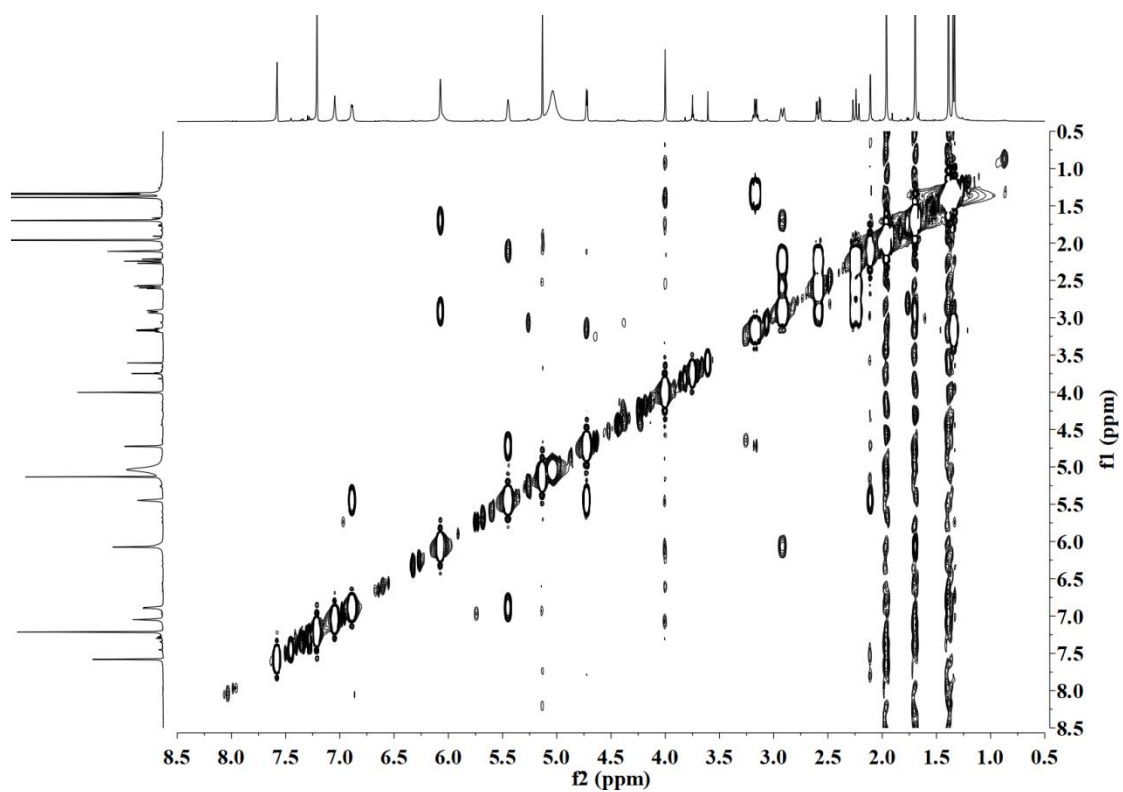

**Figure S17.**  $^1\text{H}$ - $^1\text{H}$  COSY spectrum of compound **1**

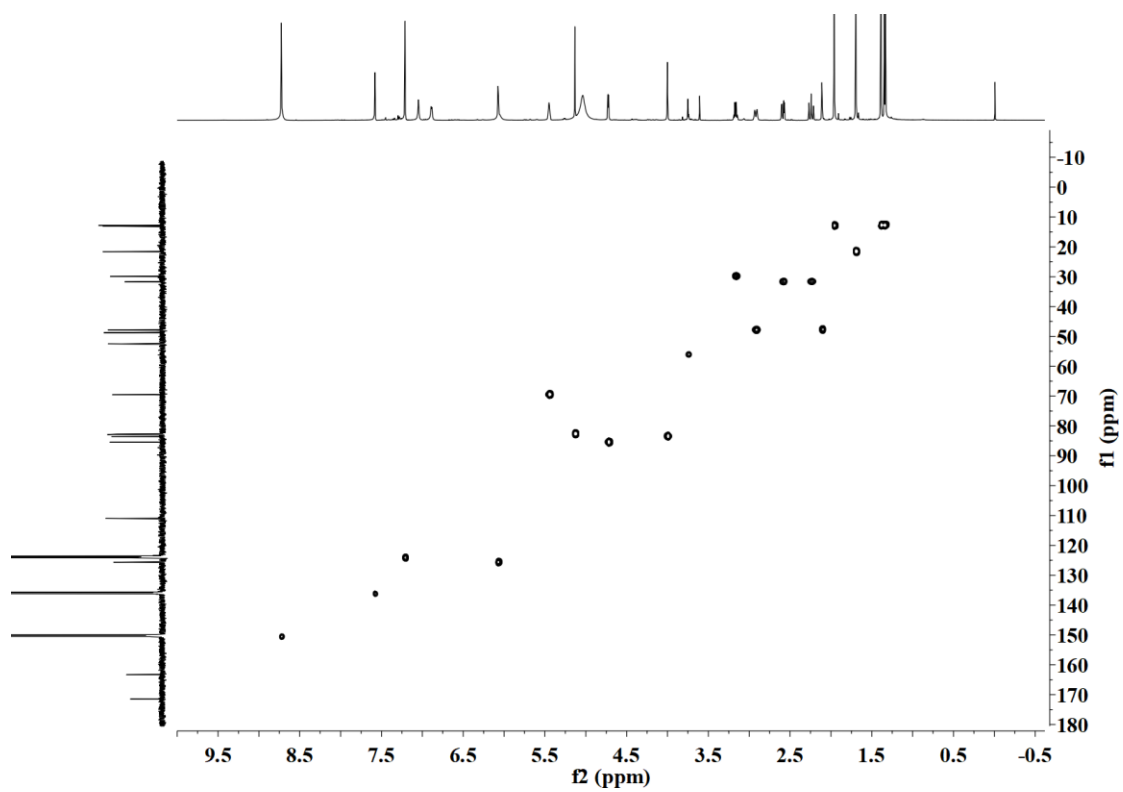

**Figure S18.** HSQC spectrum of compound **1**

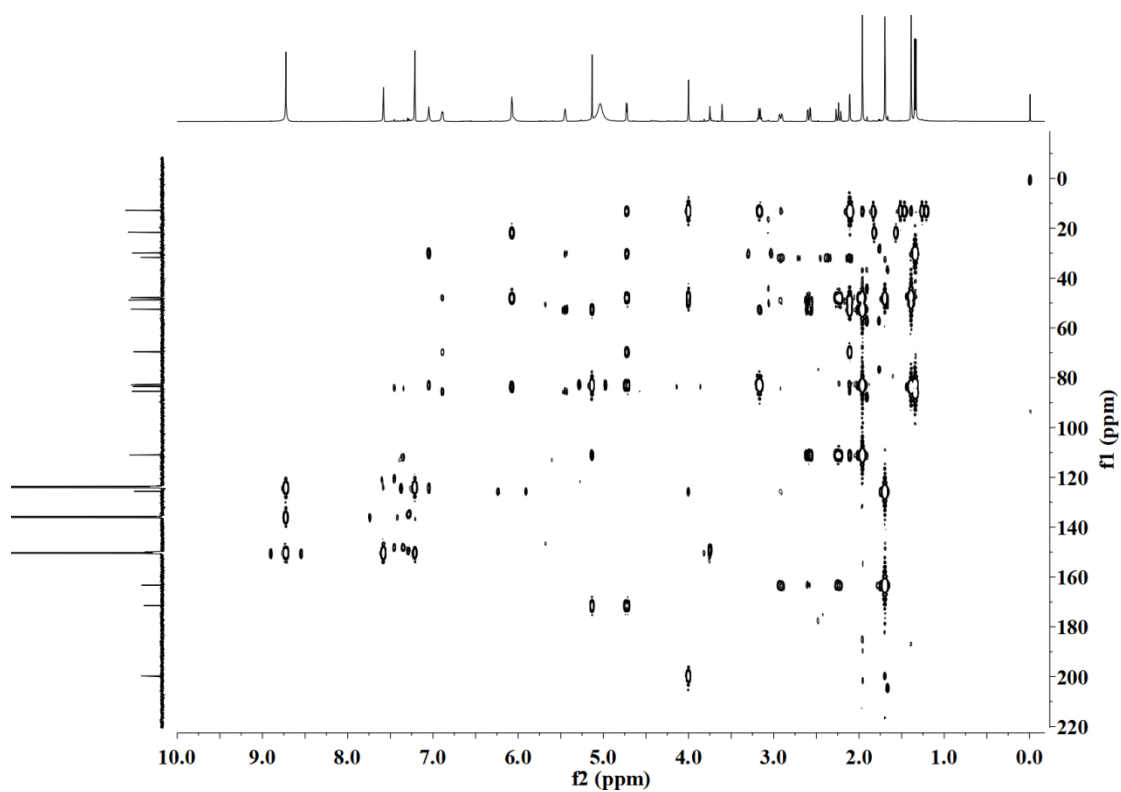

Figure S19. HMBC spectrum of compound 1

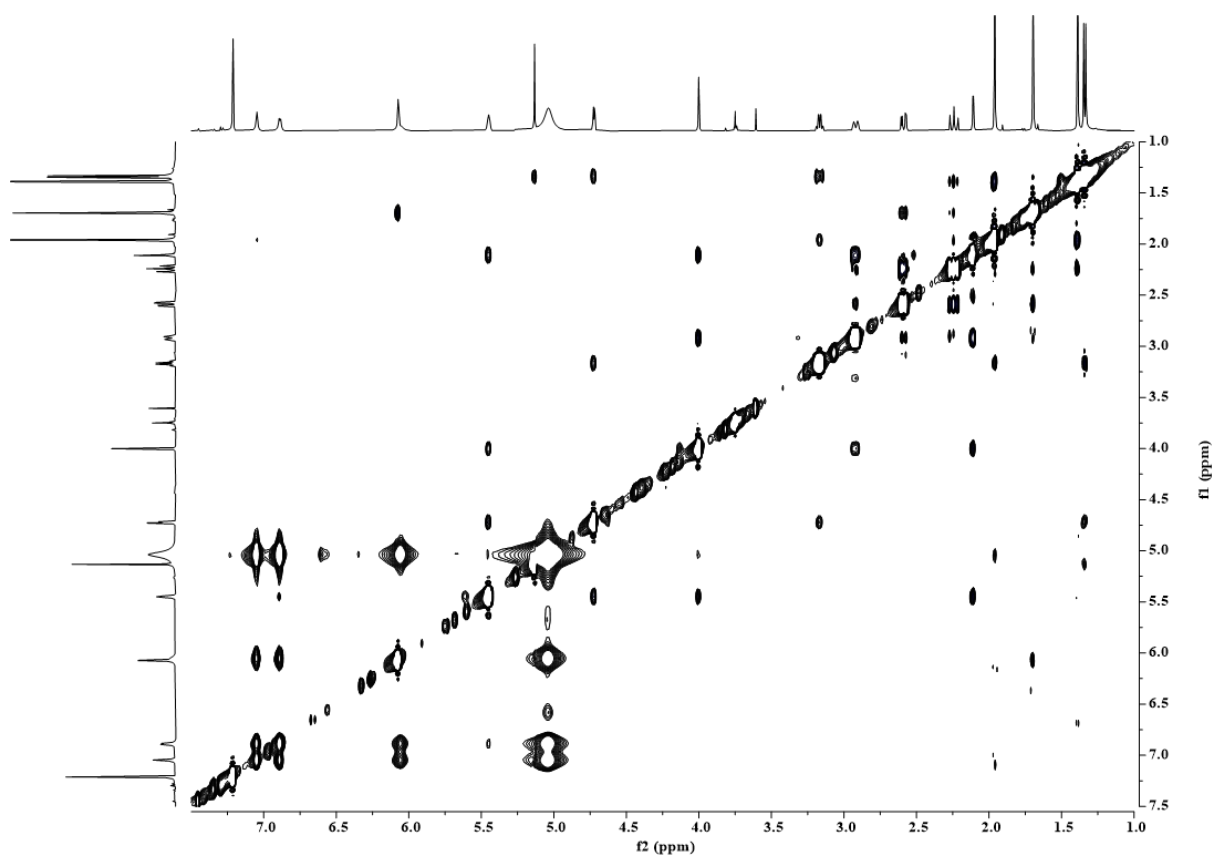

Figure S20. NOESY spectrum of compound 1

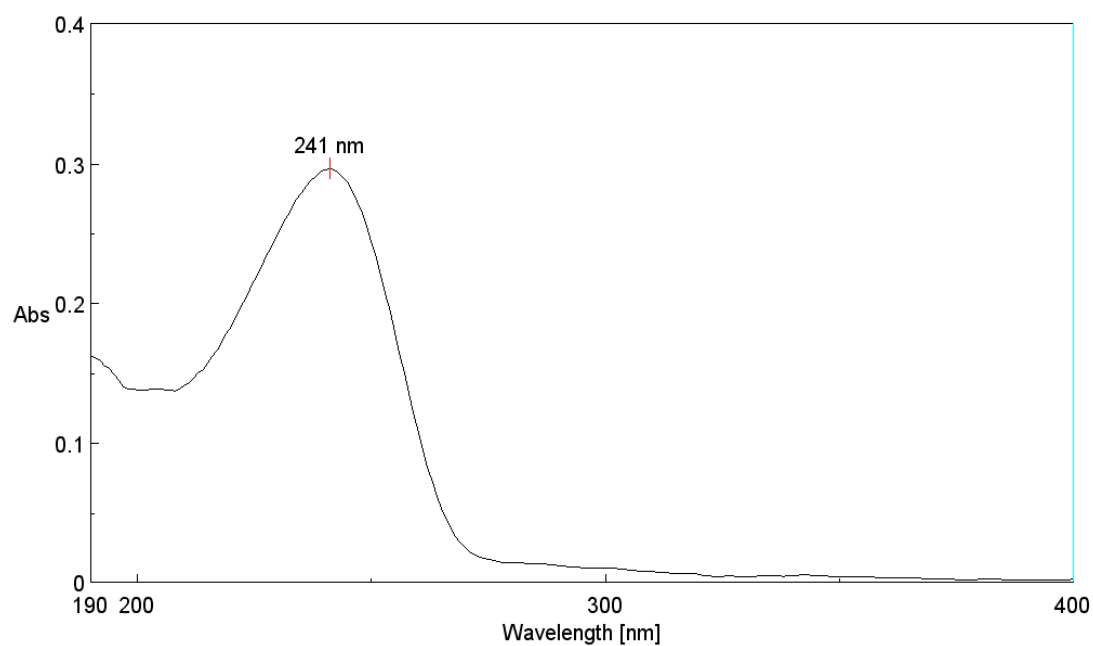

**Figure S21.** UV spectrum of compound **2**

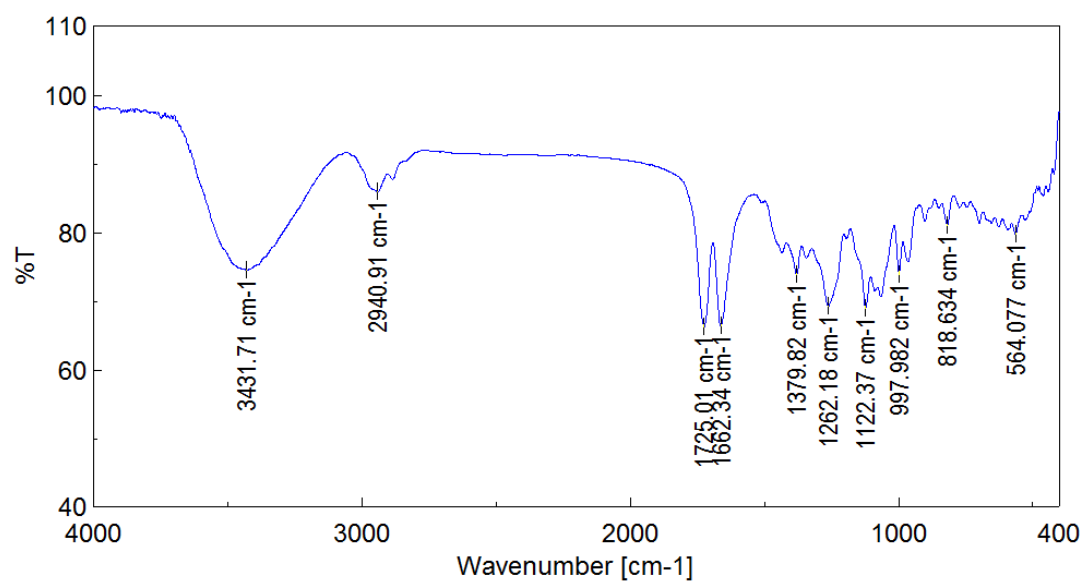

**Figure S22.** IR (KBr disc) spectrum of compound **2**

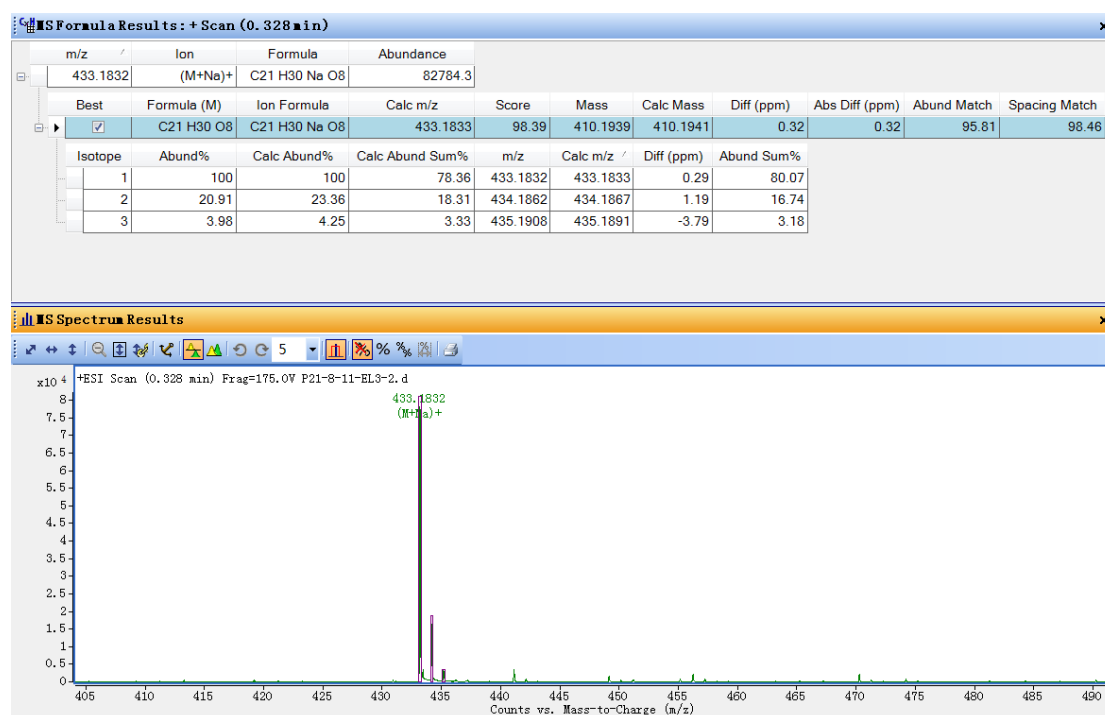

Figure S23. HR-ESI-MS spectrum of compound 2

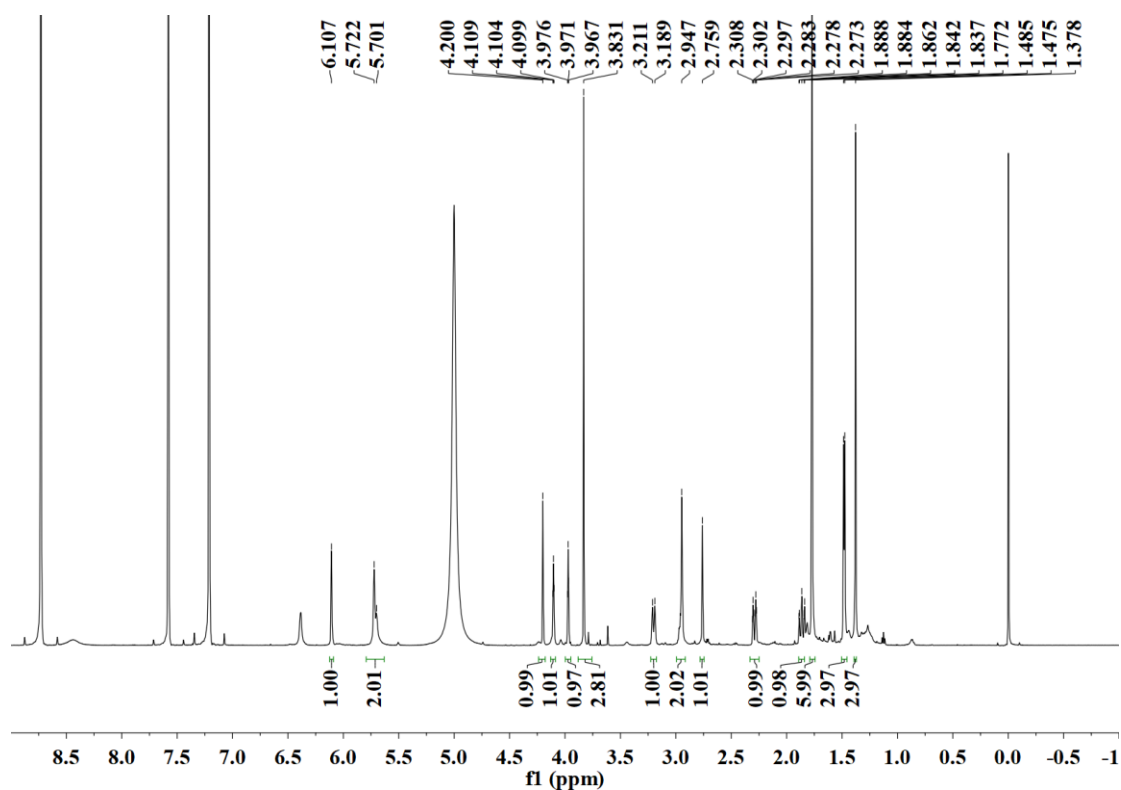

Figure S24. <sup>1</sup>H NMR spectrum of compound 2

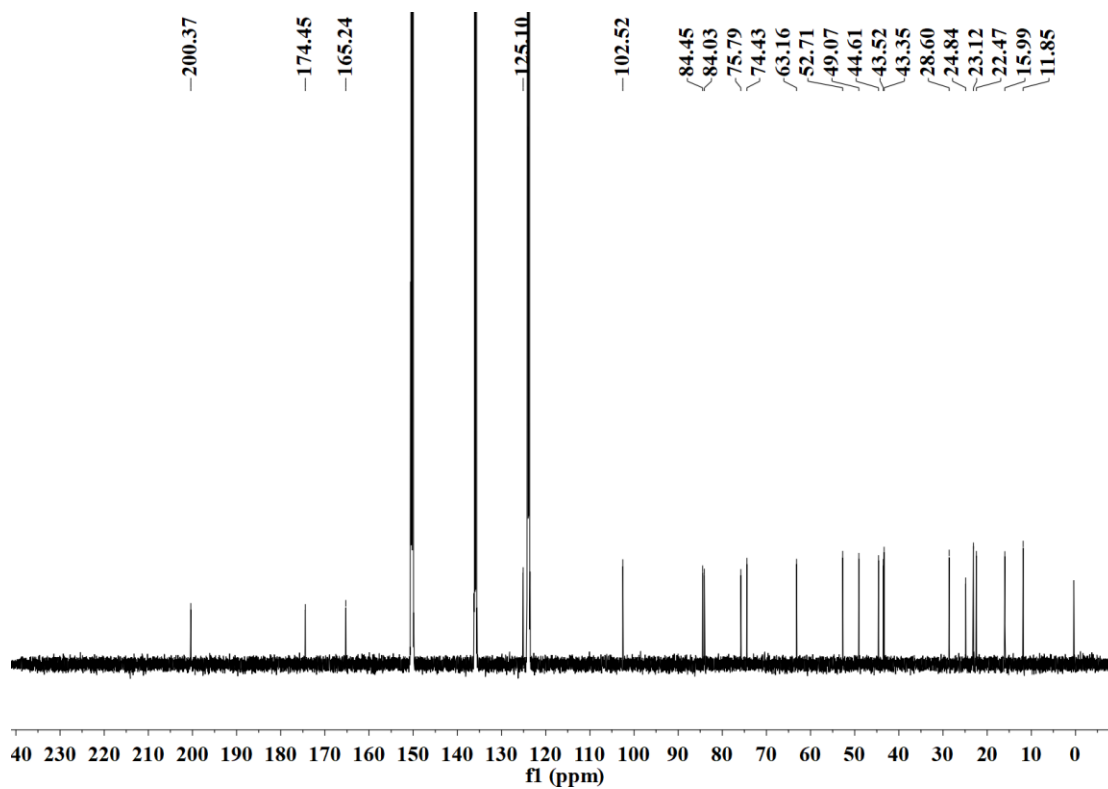

Figure S25. <sup>13</sup>C NMR spectrum of compound 2

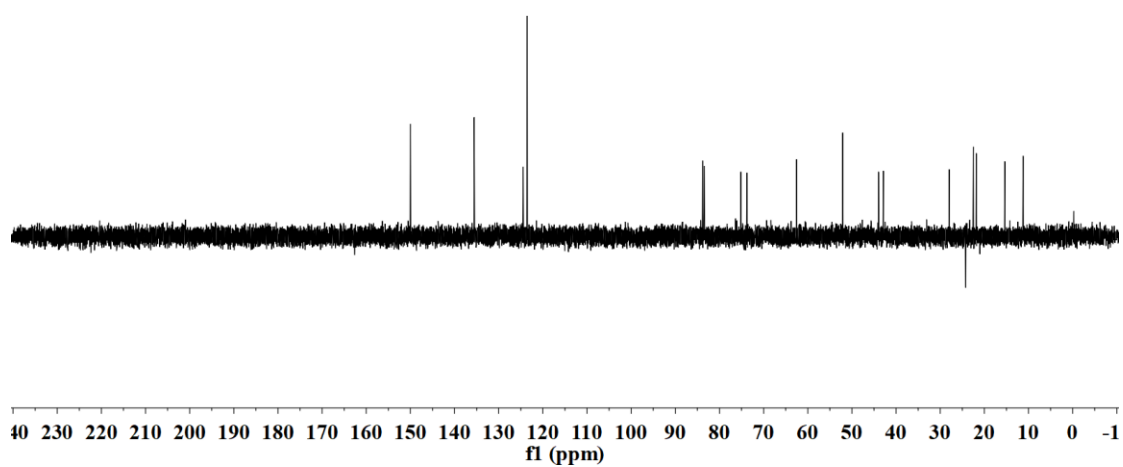

Figure S26. DEPT-135 spectrum of compound 2



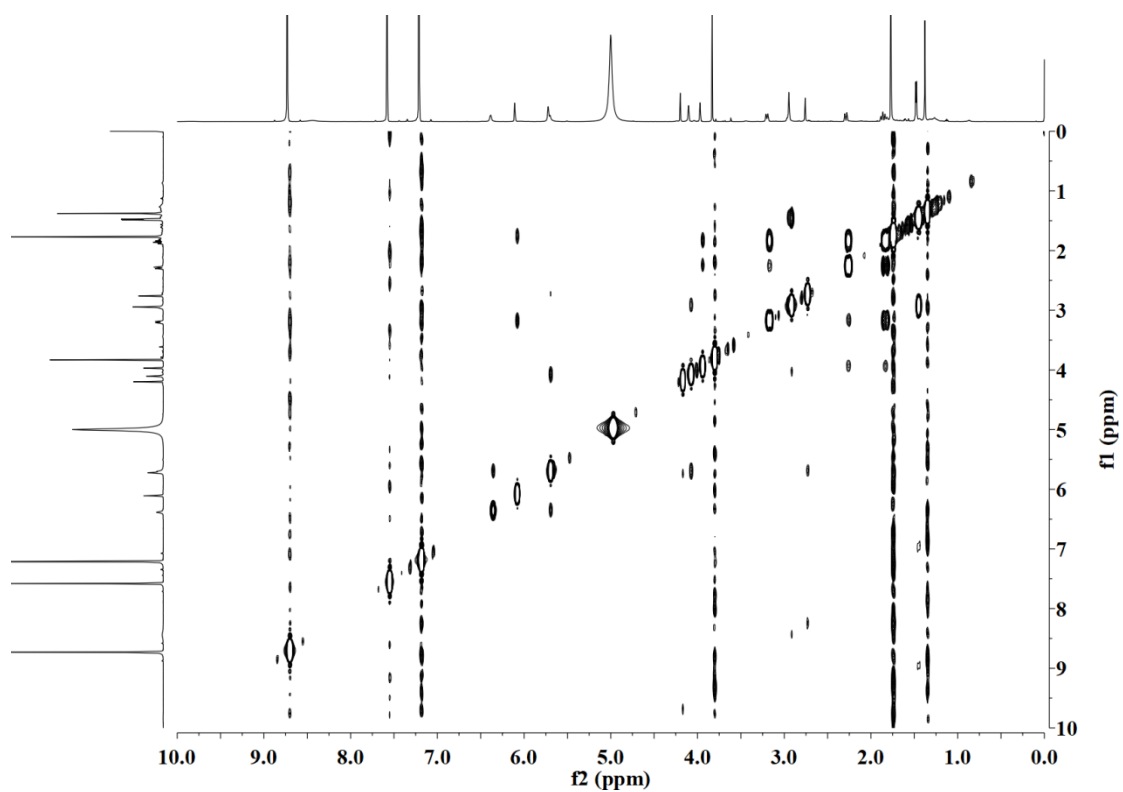

**Figure S27.**  $^1\text{H}$ - $^1\text{H}$  COSY spectrum of compound 2

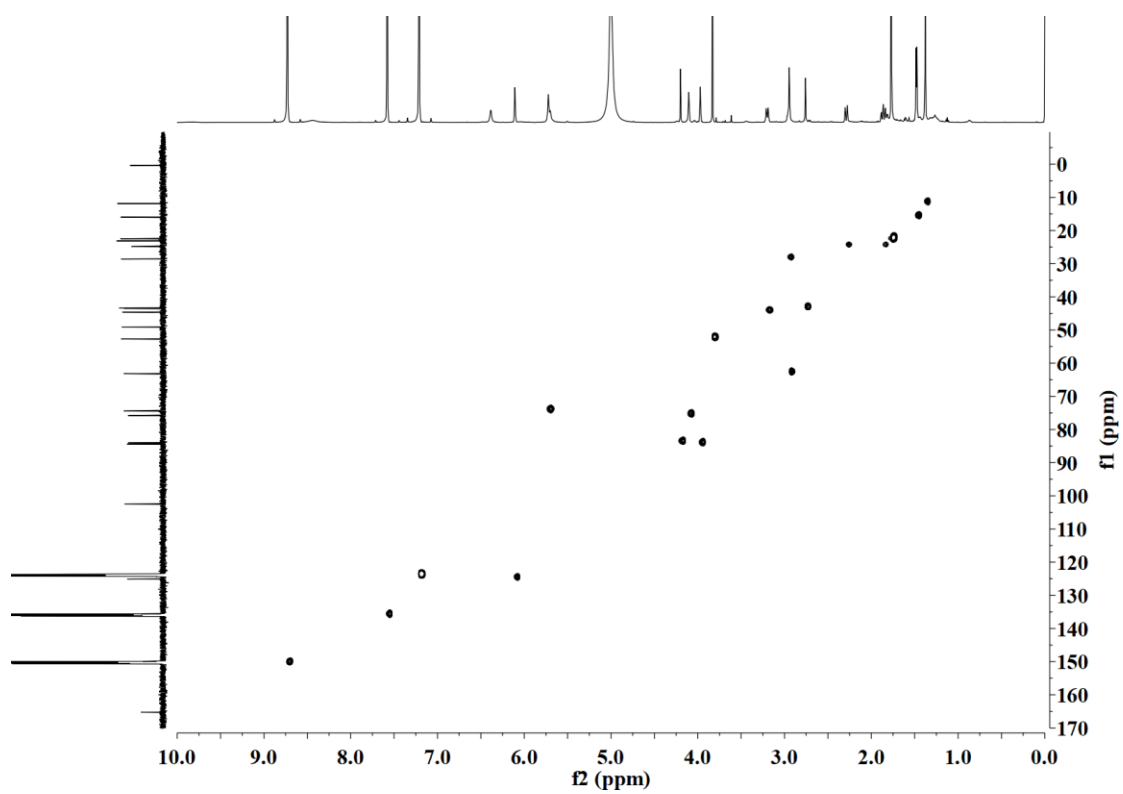

**Figure S28.** HSQC spectrum of compound 2

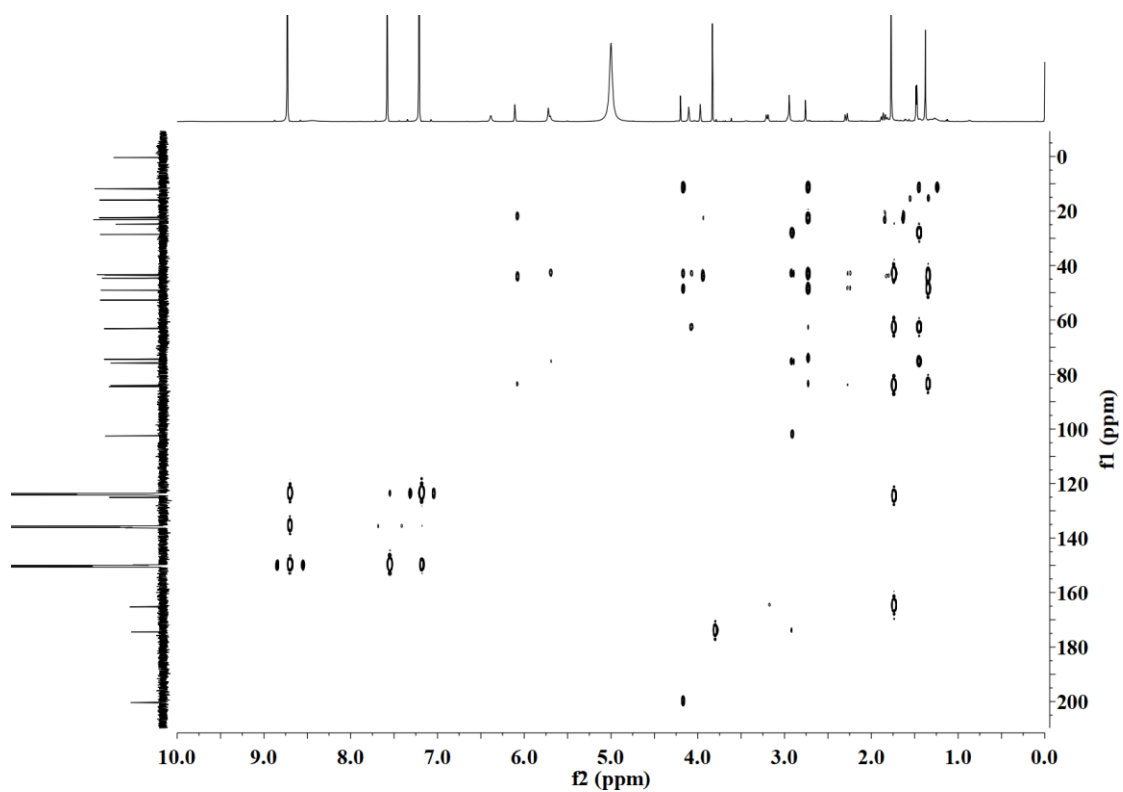

Figure S29. HMBC spectrum of compound 2

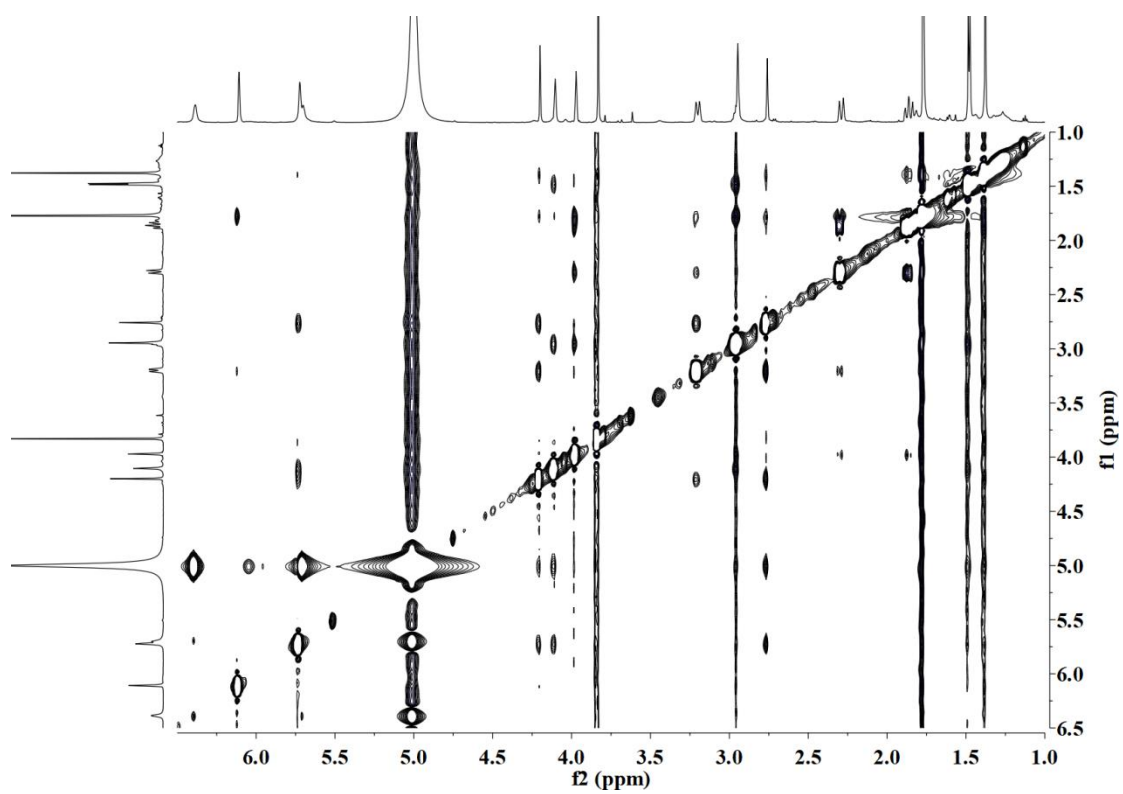

Figure S30. NOESY spectrum of compound 2

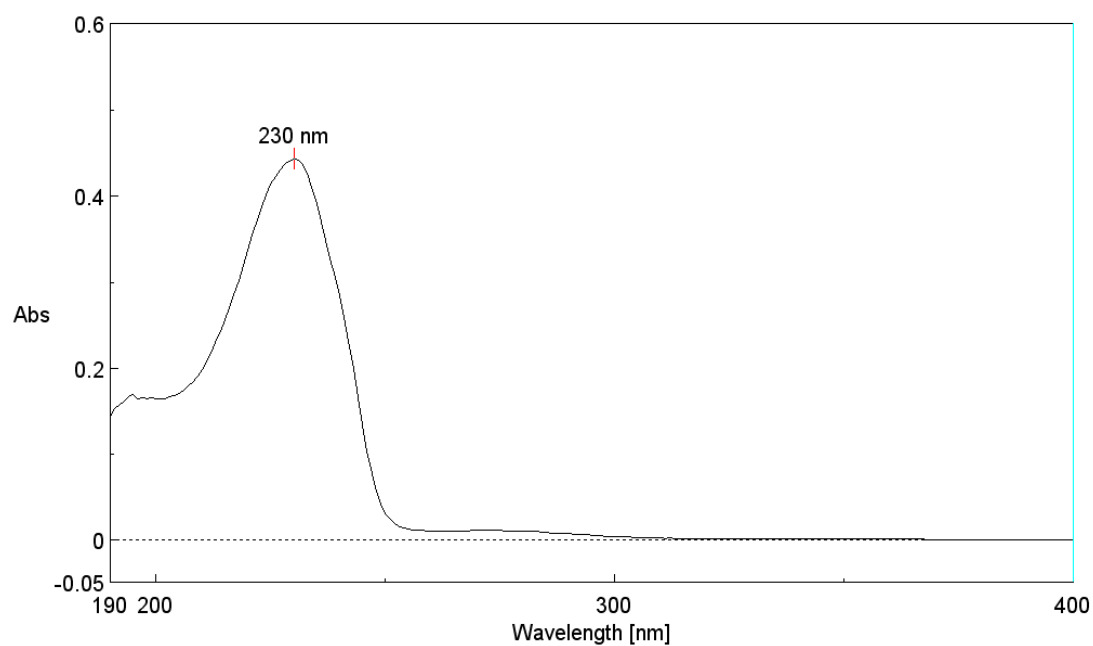

**Figure S31.** UV spectrum of compound 3

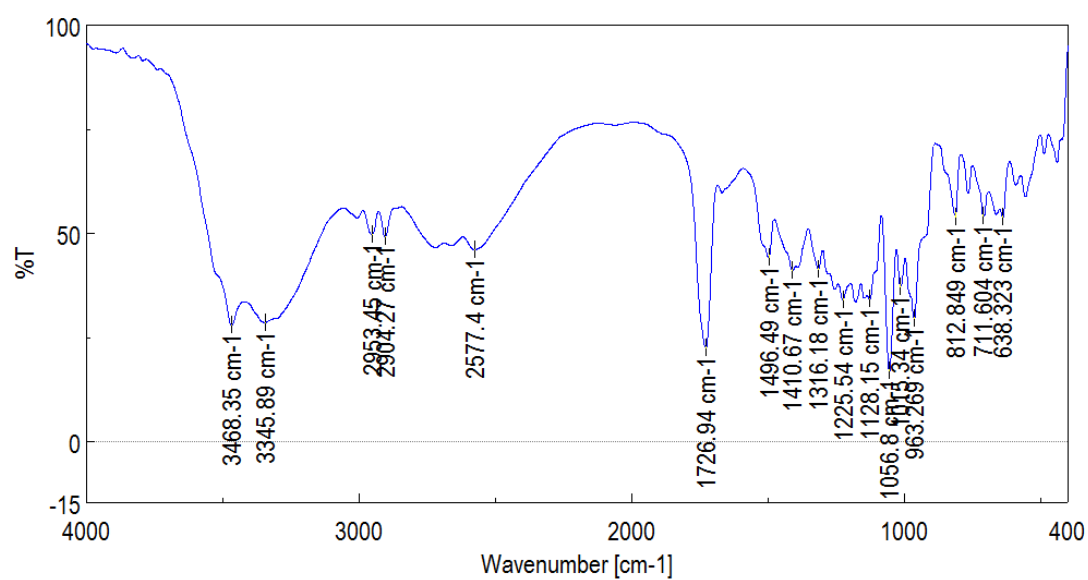

**Figure S32.** IR (KBr disc) spectrum of compound 3

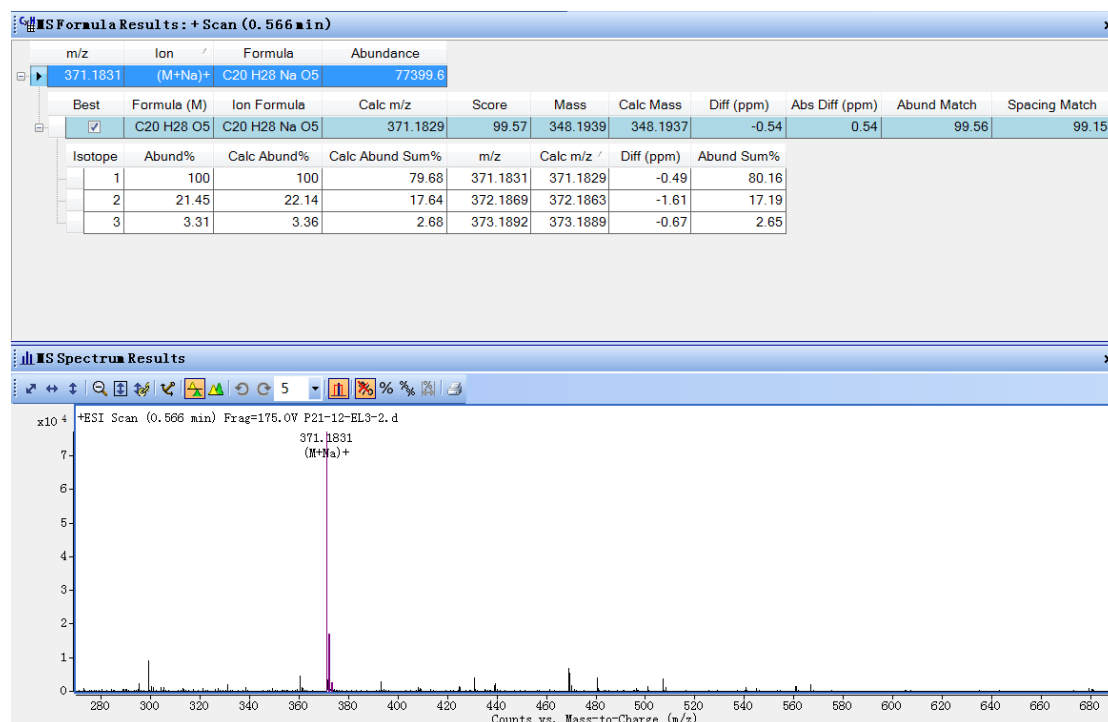

Figure S33. HR-ESI-MS spectrum of compound 3

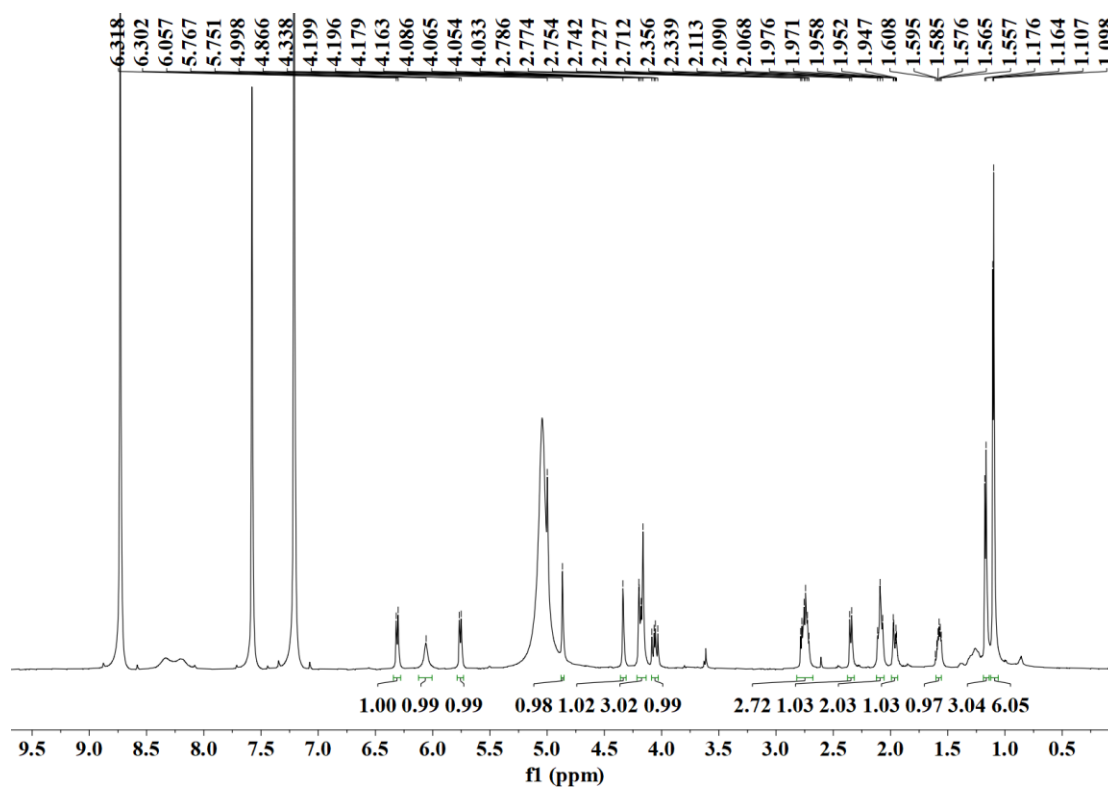

Figure S34. <sup>1</sup>H NMR spectrum of compound 3

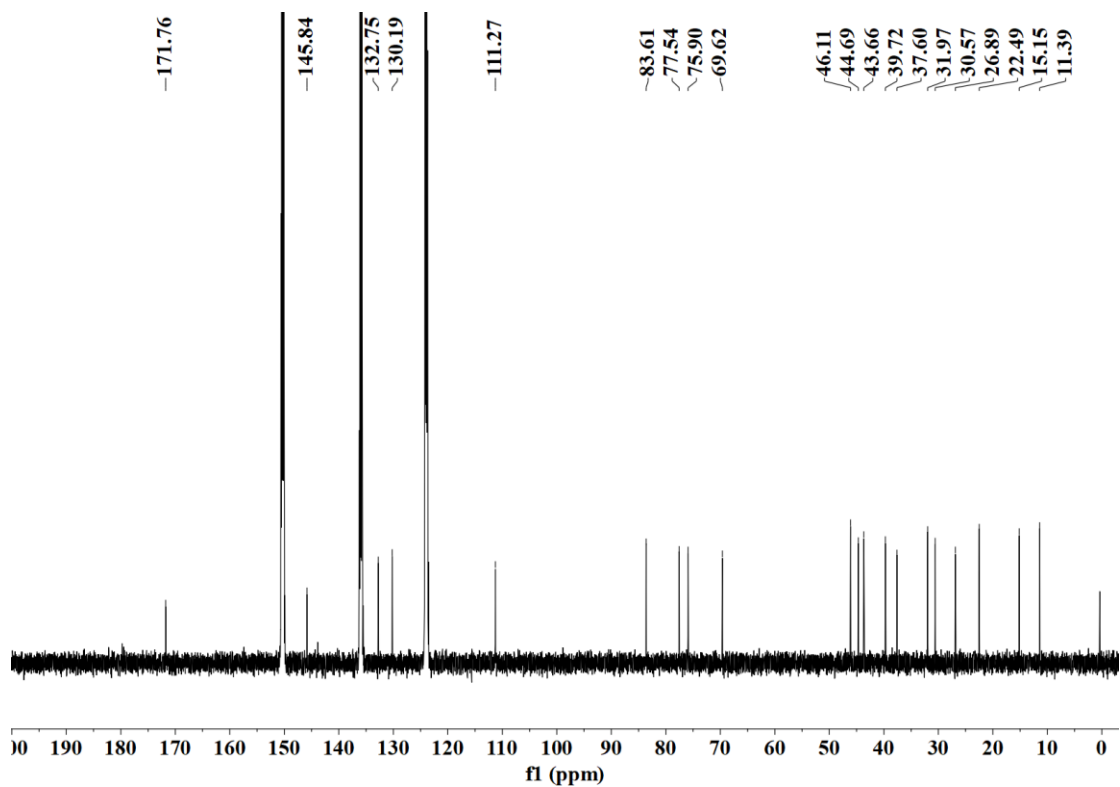

Figure S35.  $^{13}\text{C}$  NMR spectrum of compound 3

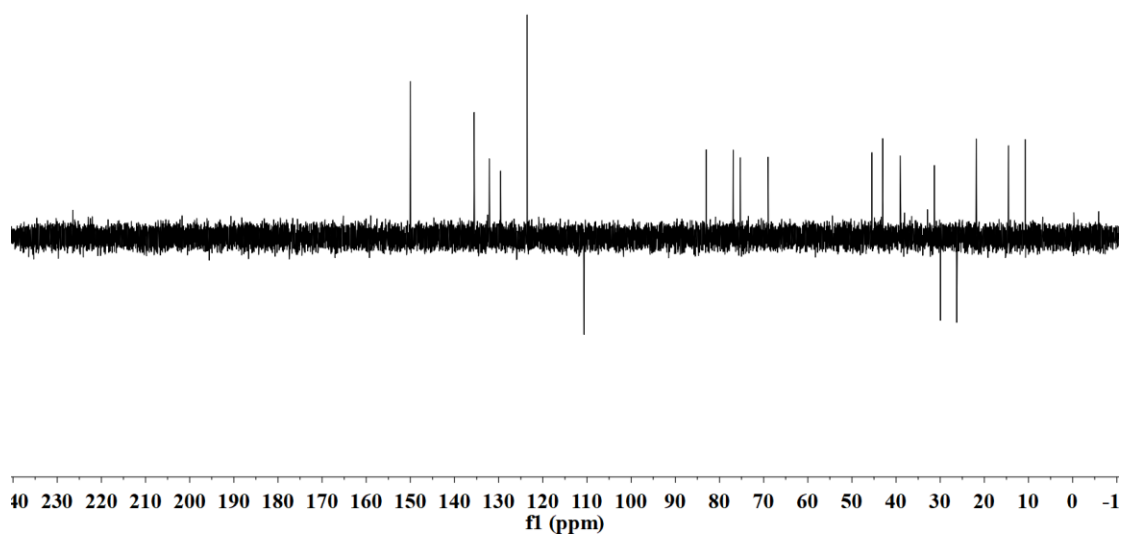

Figure S36. DEPT-135 spectrum of compound 3

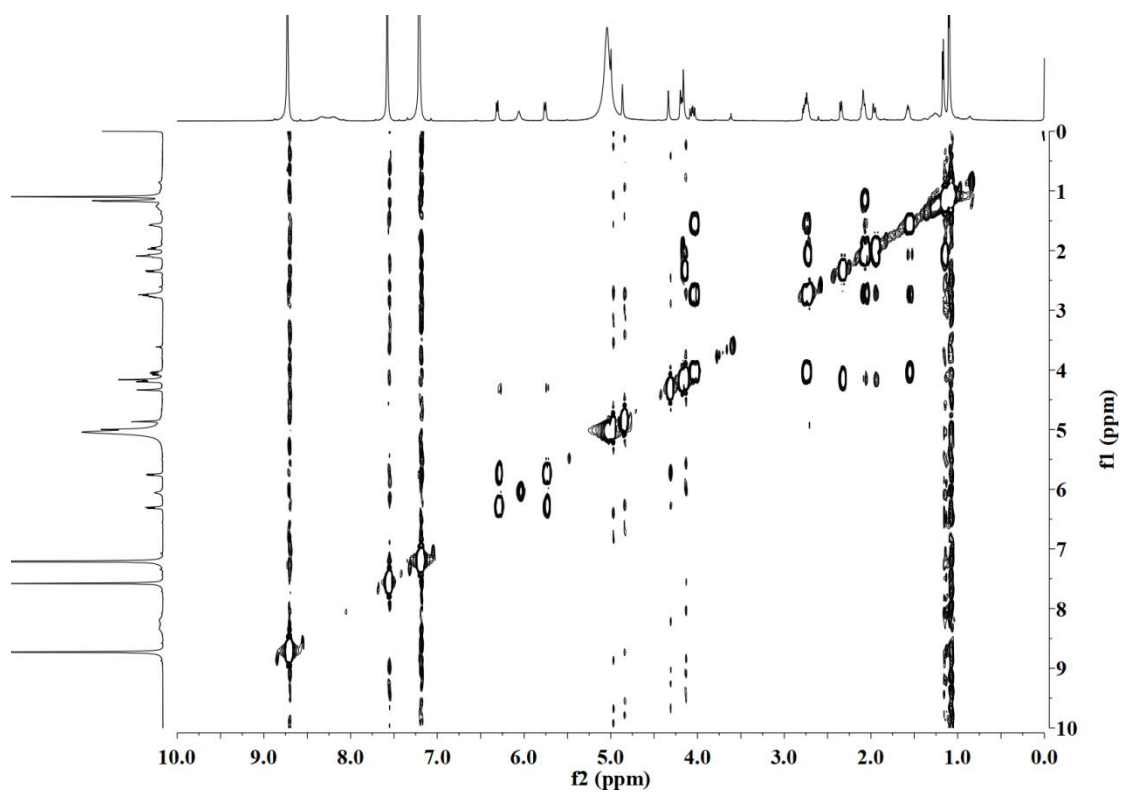

**Figure S37.**  $^1\text{H}$ - $^1\text{H}$  COSY spectrum of compound **3**

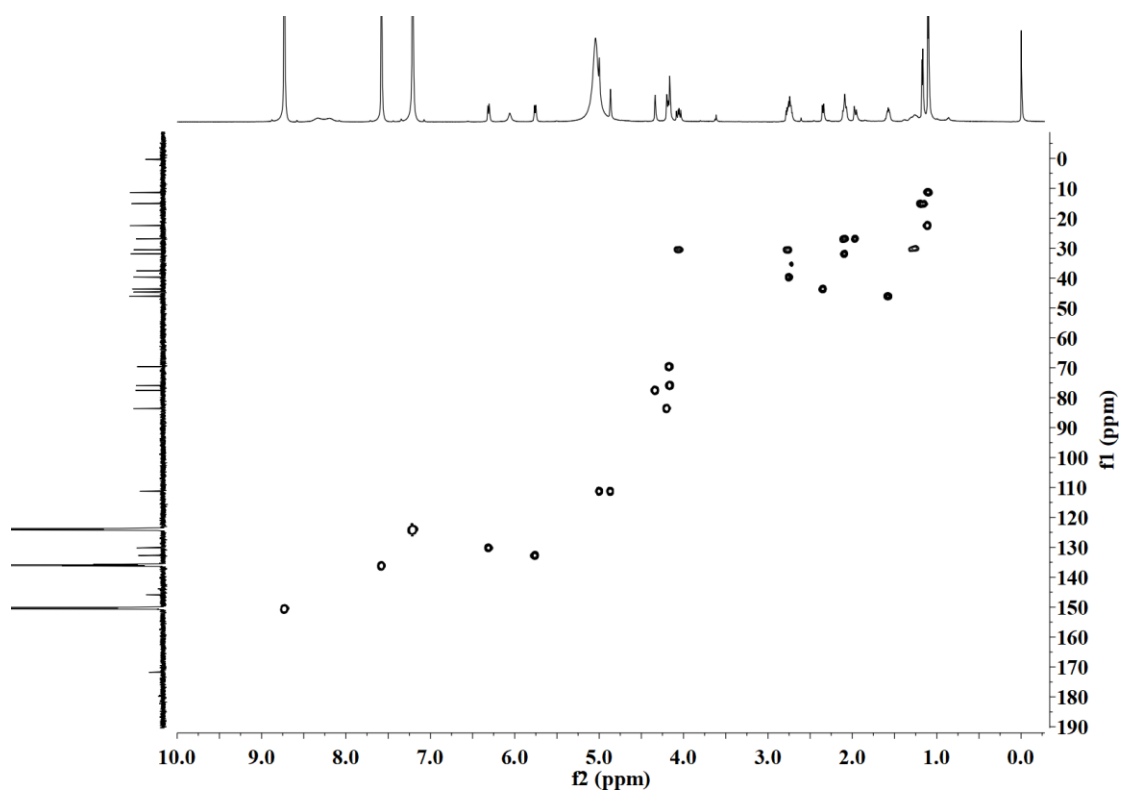

**Figure S38.** HSQC spectrum of compound **3**

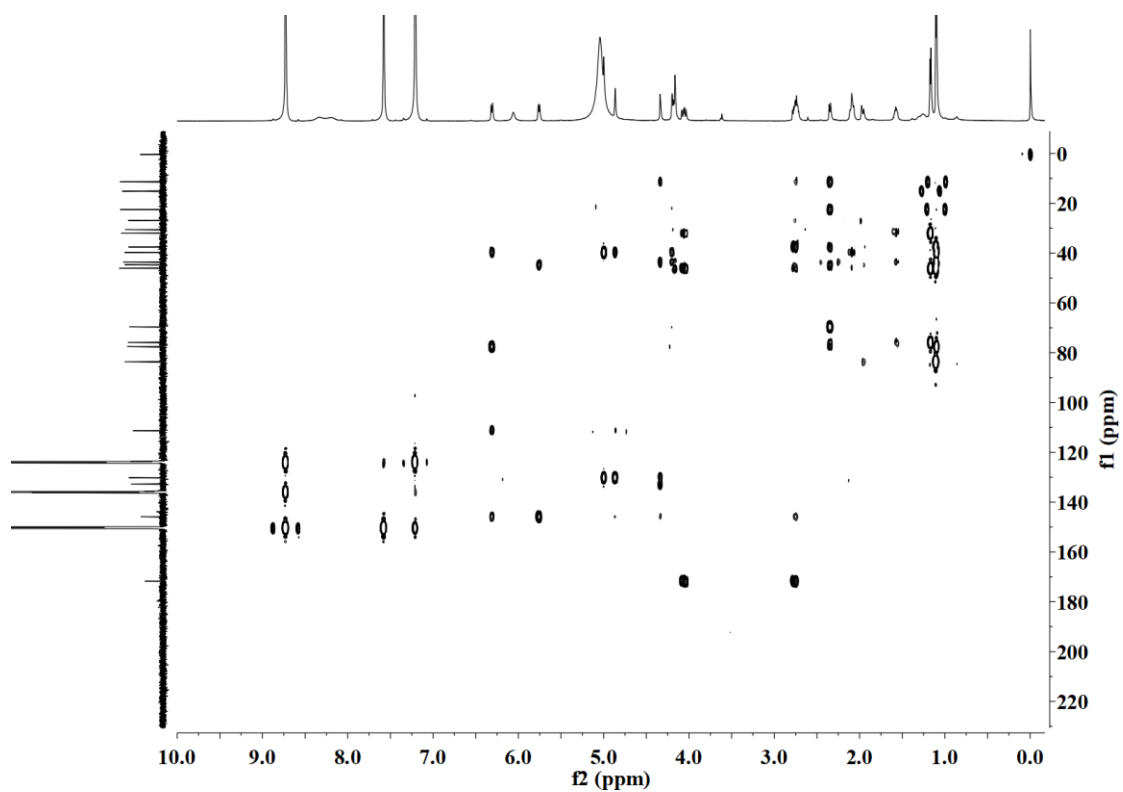

**Figure S39.** HMBC spectrum of compound 3

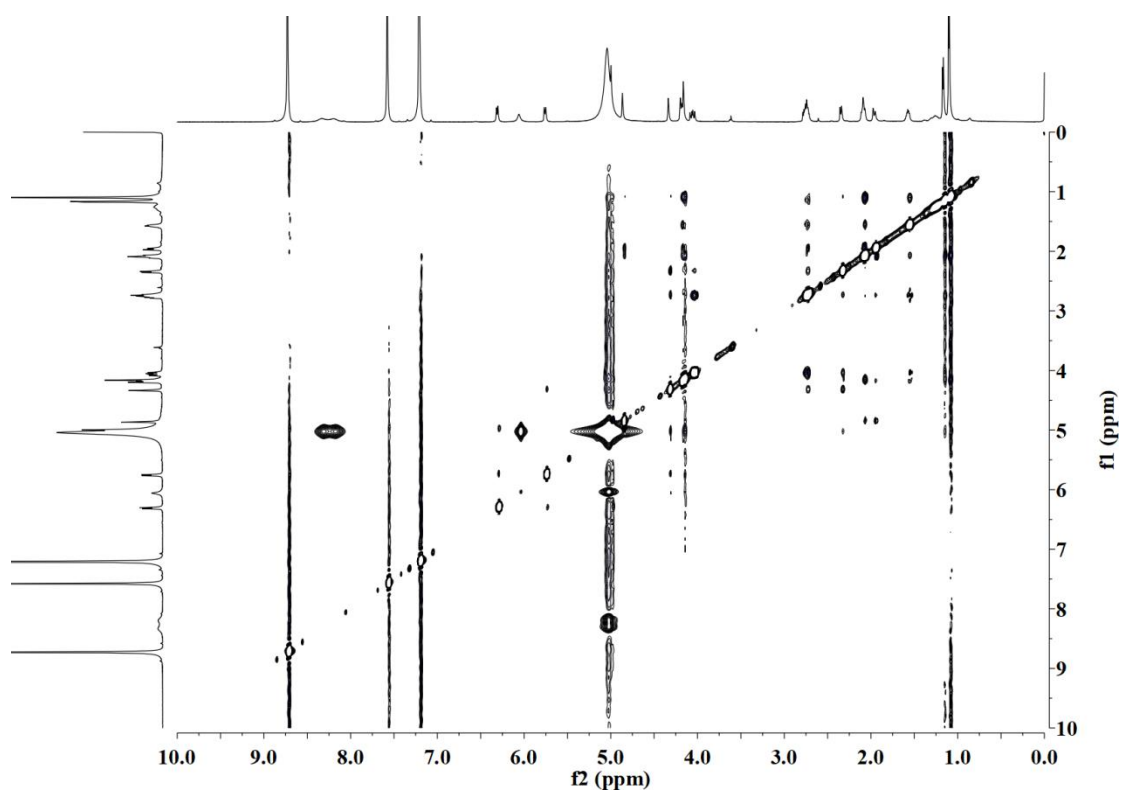

**Figure S40.** NOESY spectrum of compound 3

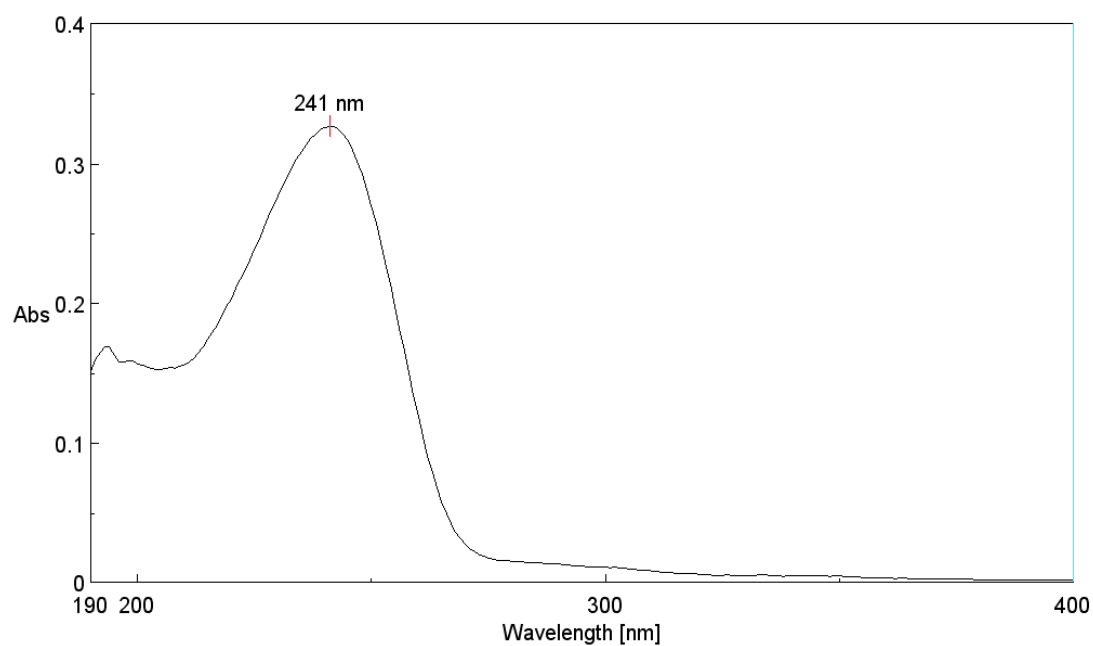

**Figure S41.** UV spectrum of compound **4**

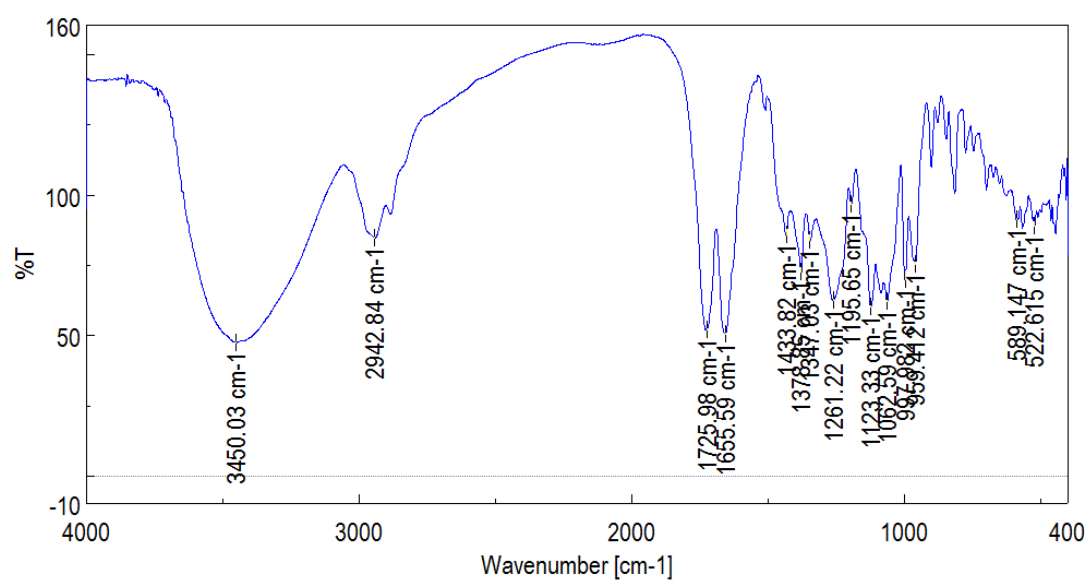

**Figure S42.** IR (KBr disc) spectrum of compound **4**



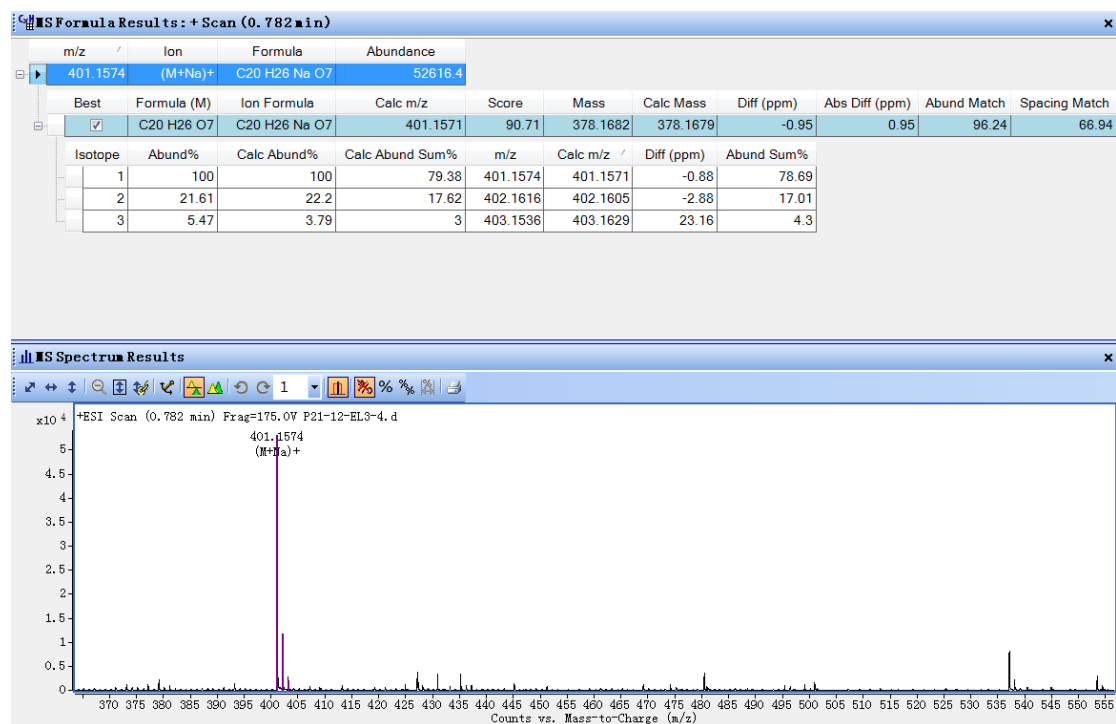

Figure S43. HR-ESI-MS spectrum of compound 4

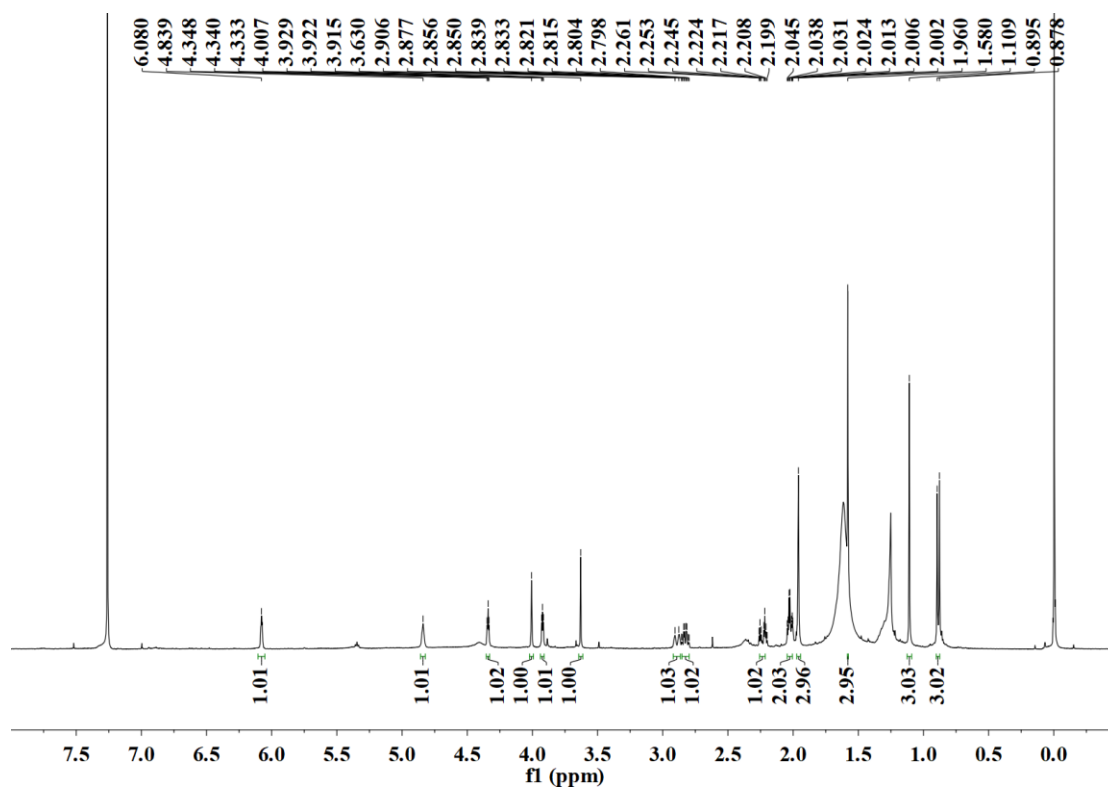

Figure S44. <sup>1</sup>H NMR spectrum of compound 4

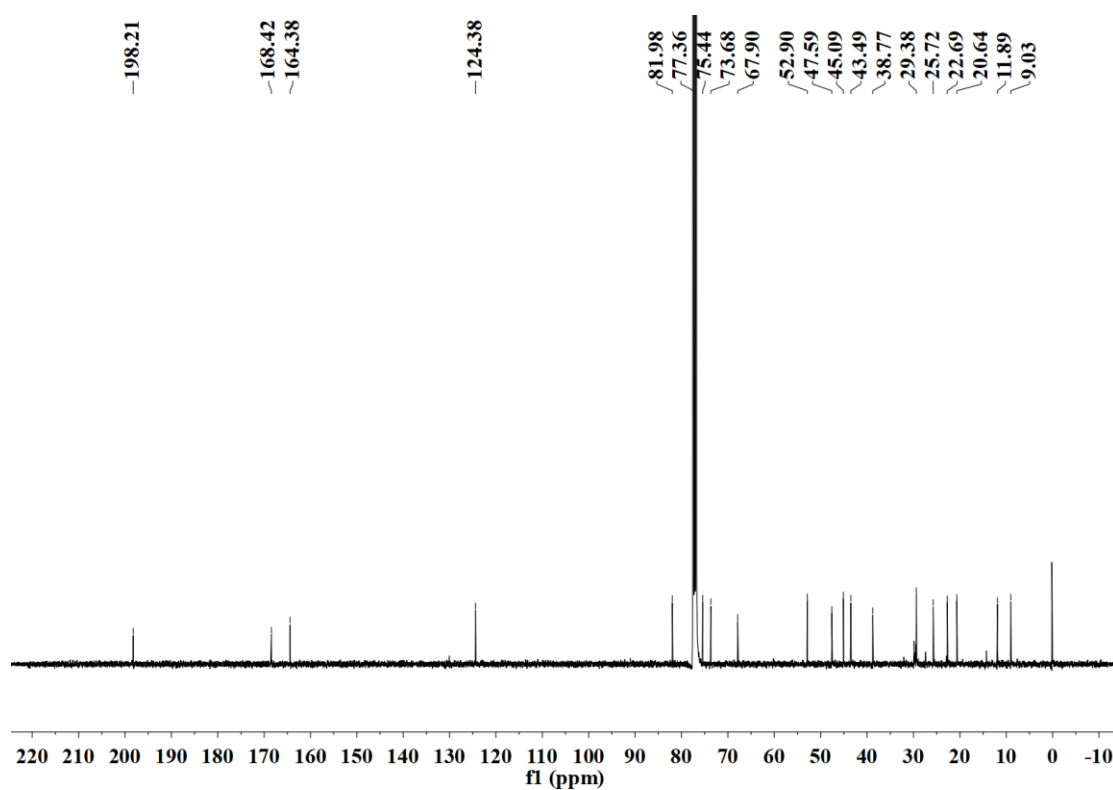

Figure S45. <sup>13</sup>C NMR spectrum of compound 4

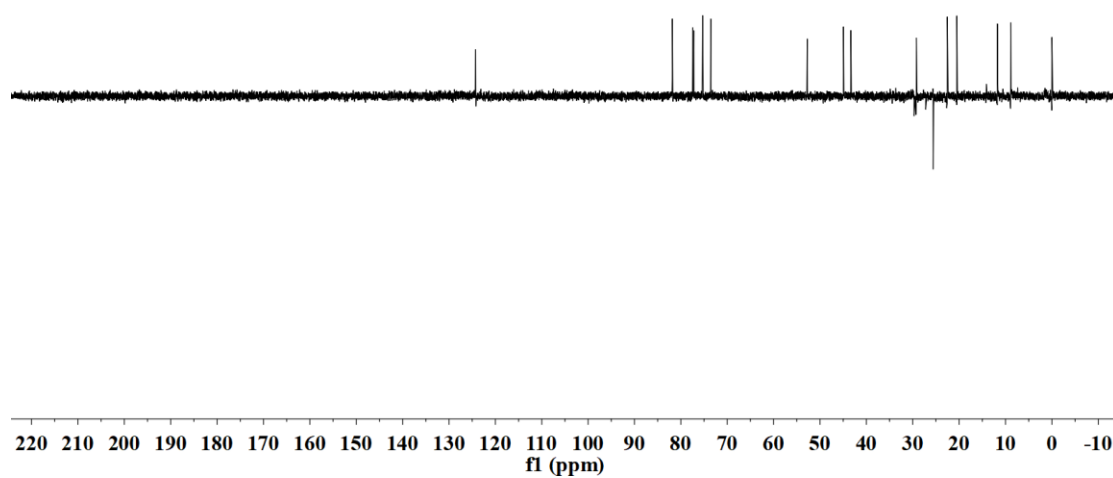

Figure S46. DEPT-135 spectrum of compound 4



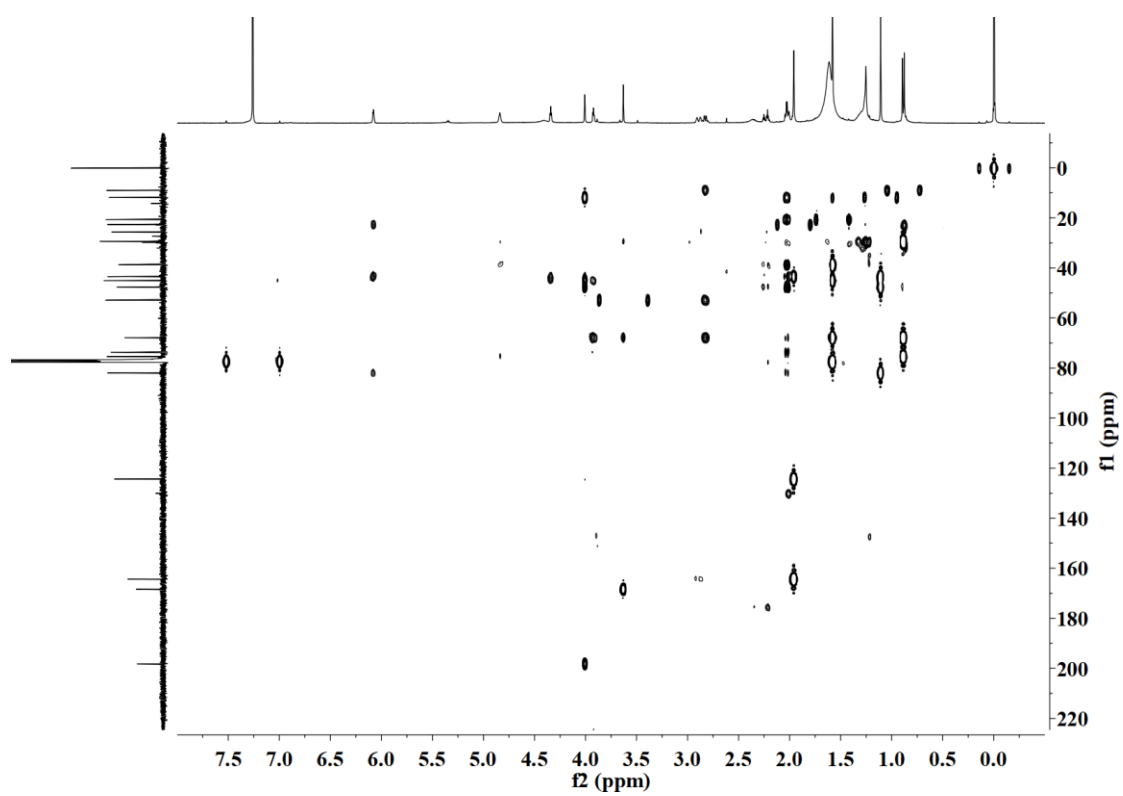

**Figure S49.** HMBC spectrum of compound 4

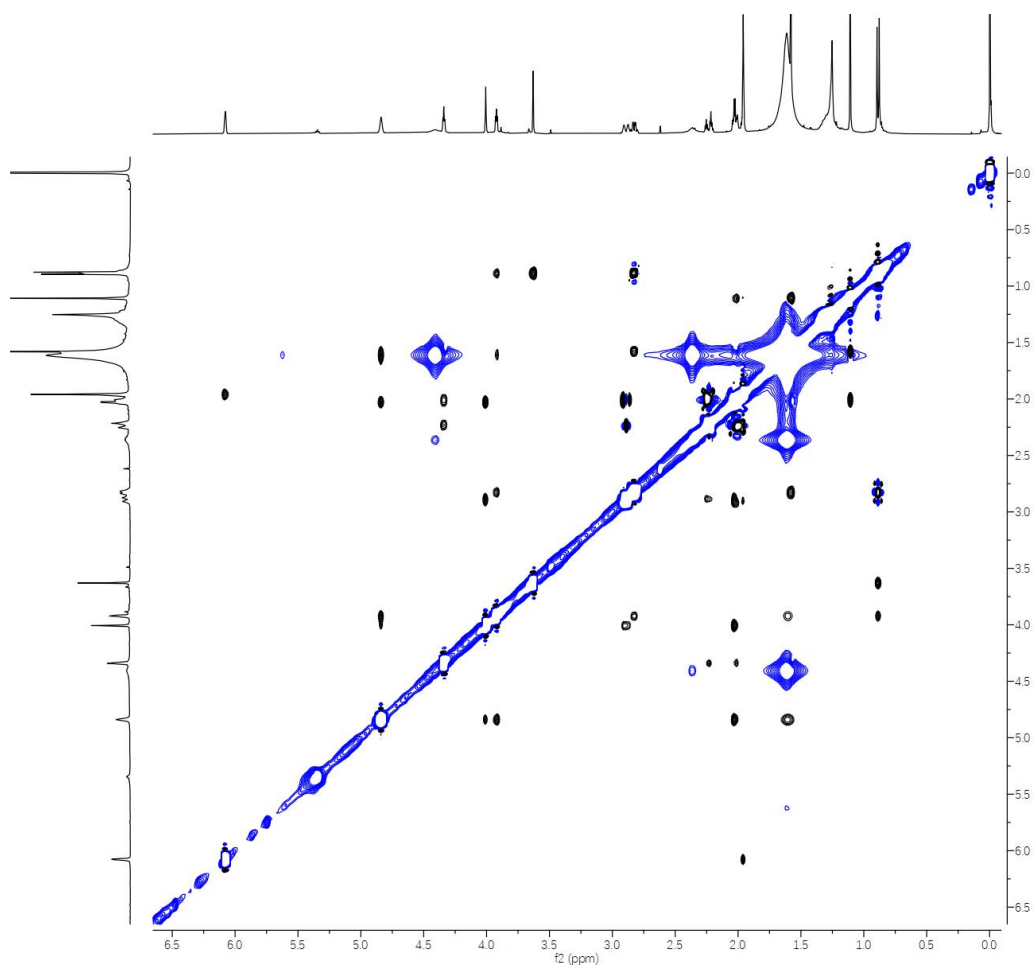

Figure S50. NOESY spectrum of compound 4

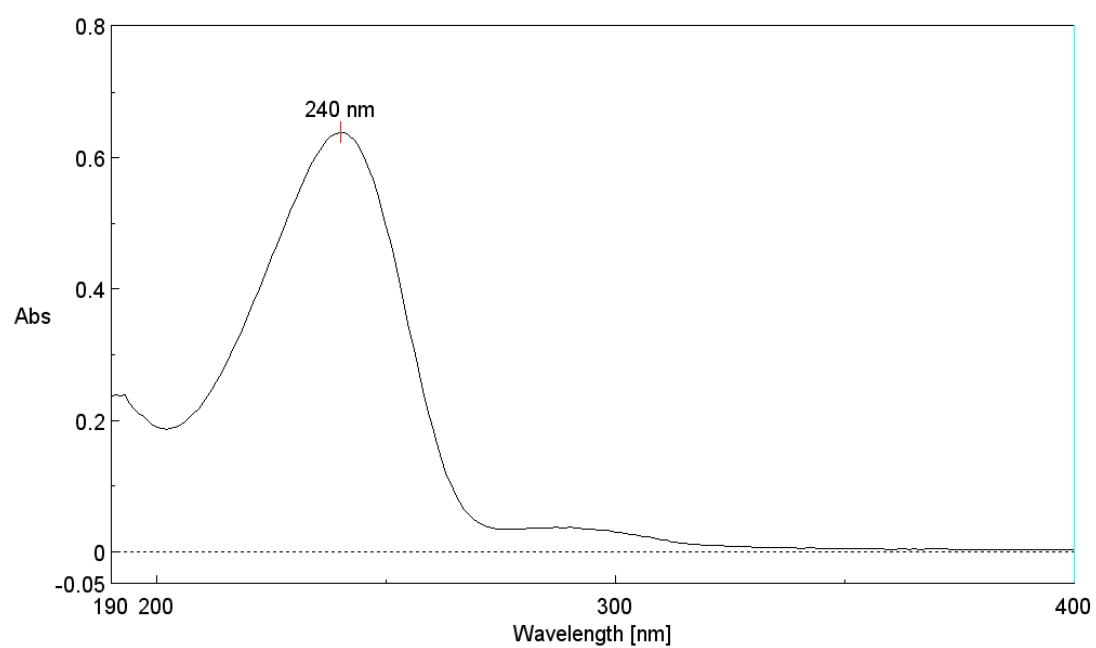

Figure S51. UV spectrum of compound 5

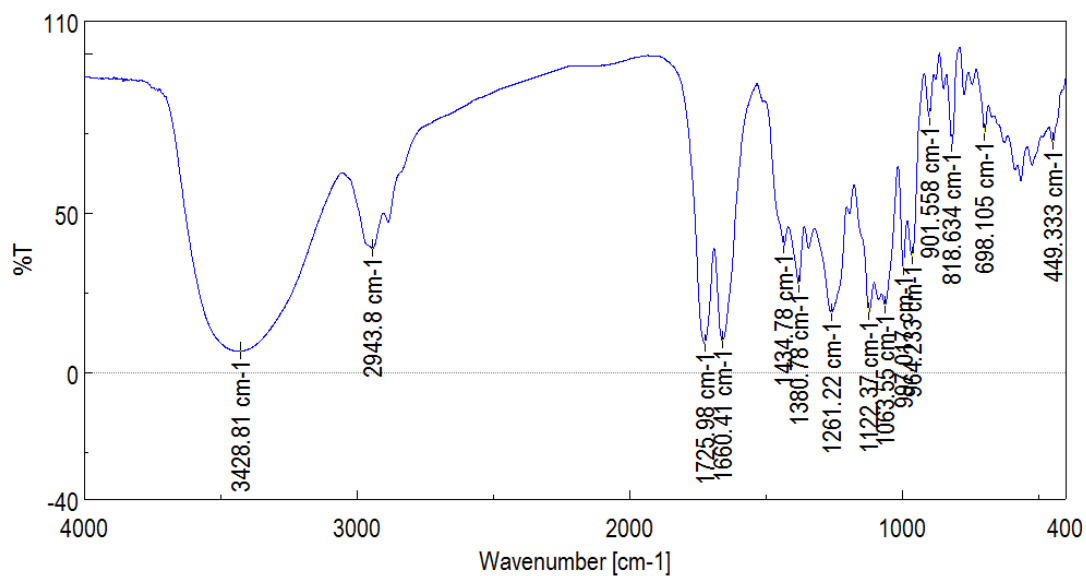

Figure S52. IR (KBr disc) spectrum of compound 5

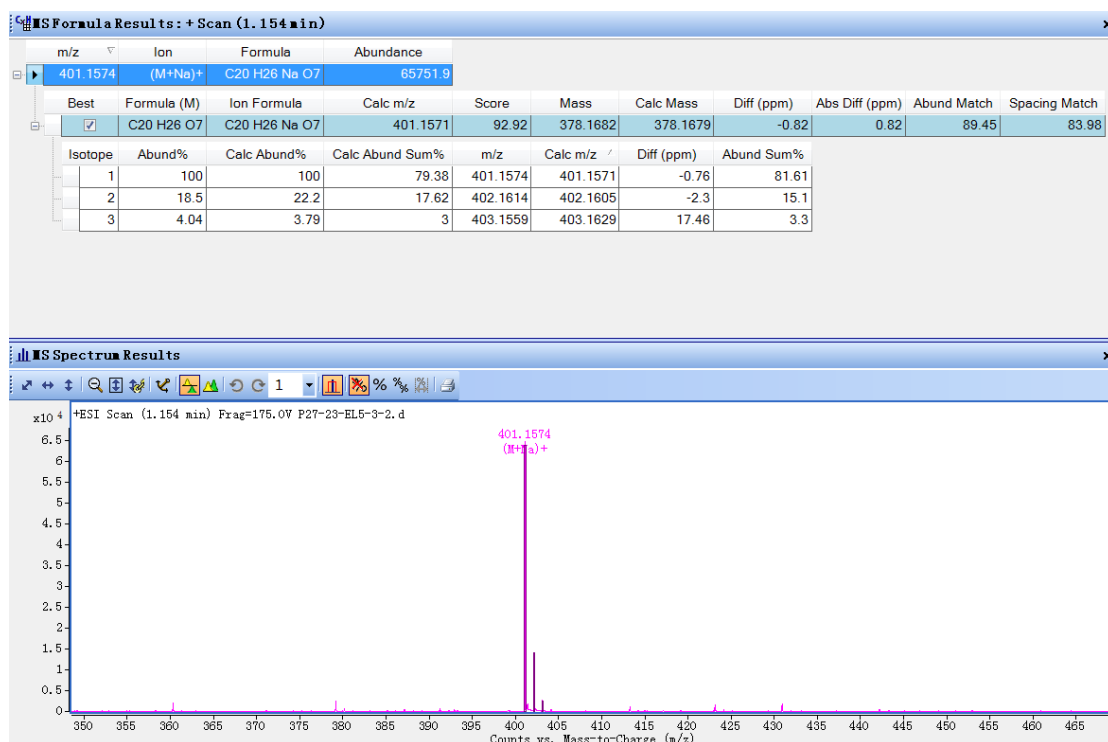

Figure S53. HR-ESI-MS spectrum of compound 5

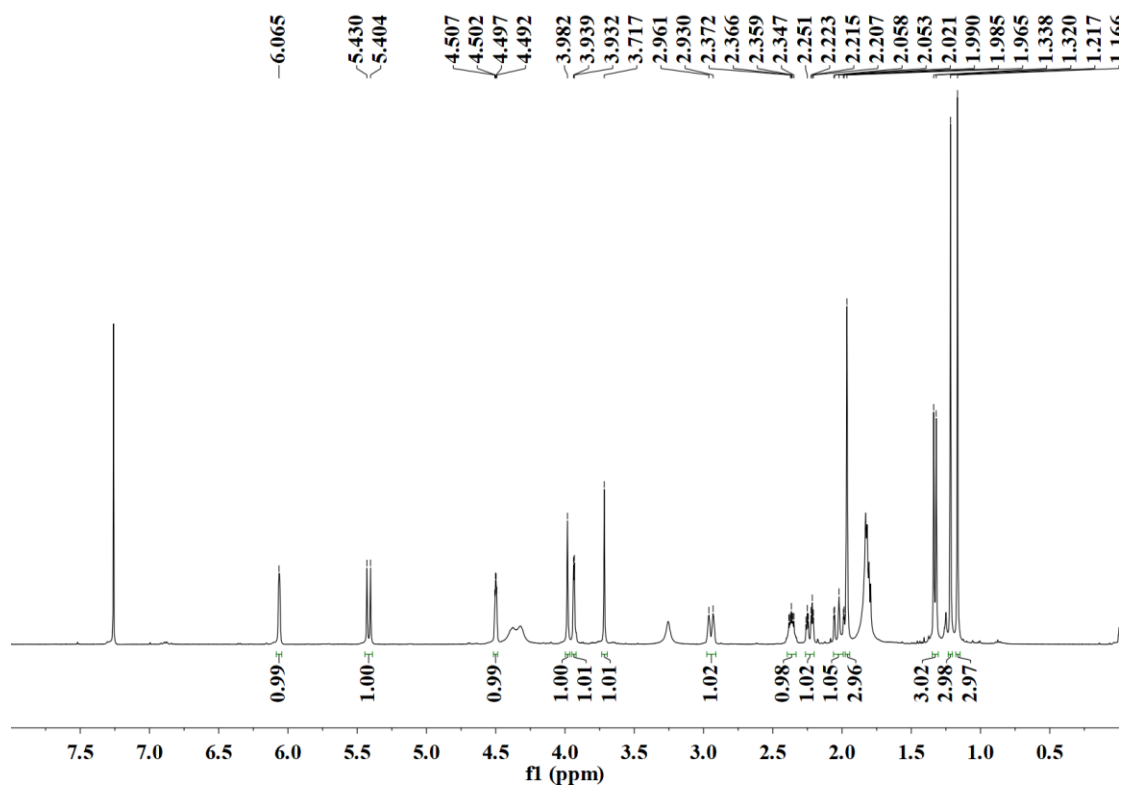

Figure S54.  $^1\text{H}$  NMR spectrum of compound 5

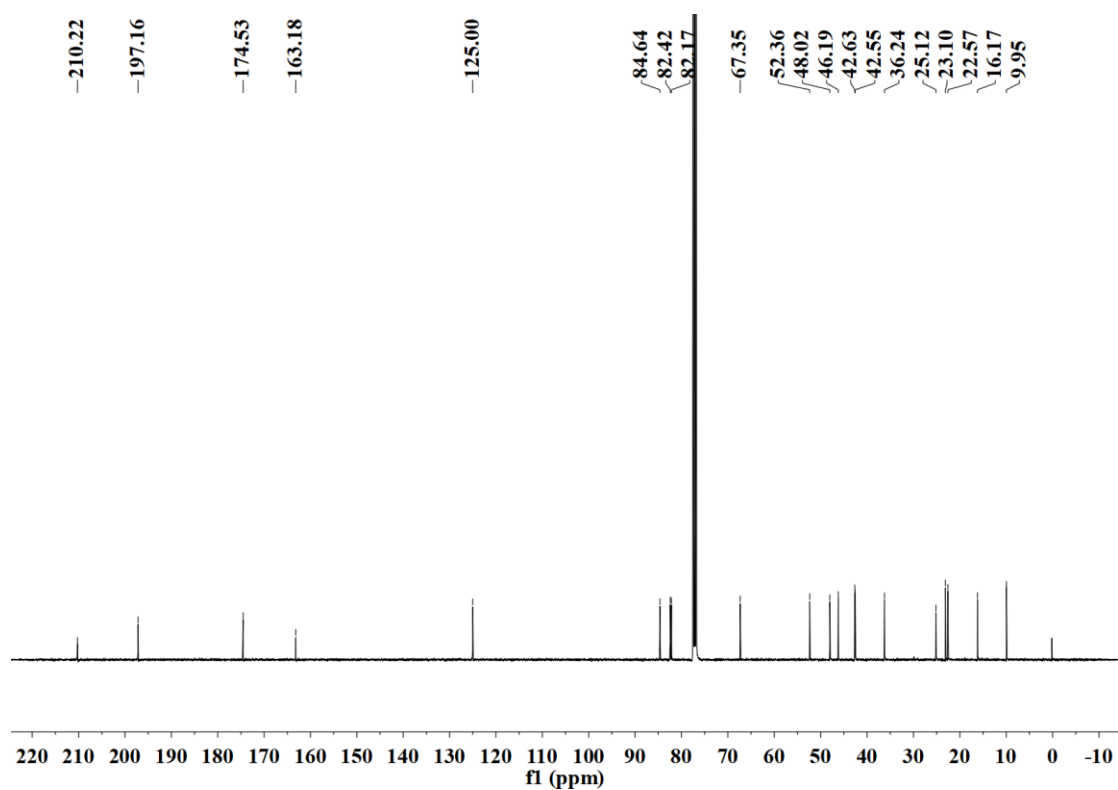

Figure S55.  $^{13}\text{C}$  NMR spectrum of compound 5

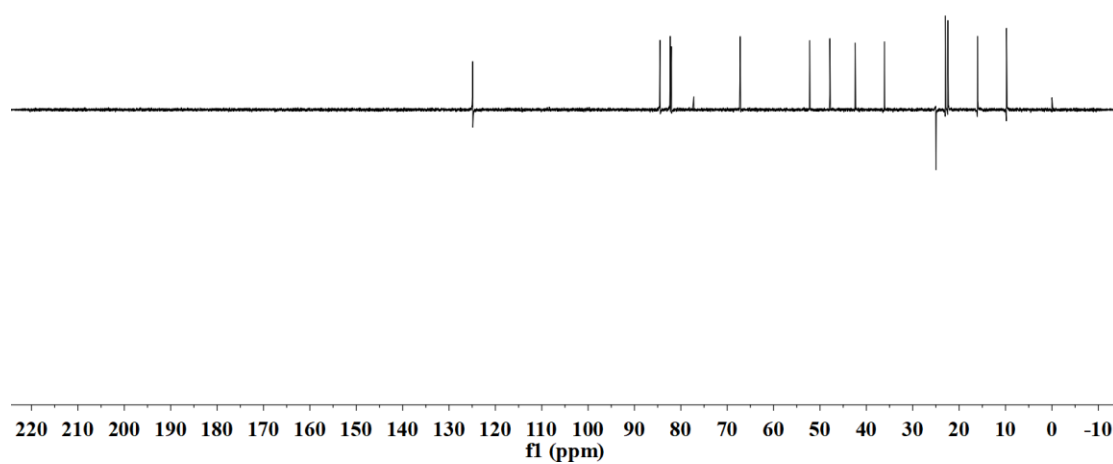

**Figure S56.** DEPT-135 spectrum of compound **5**

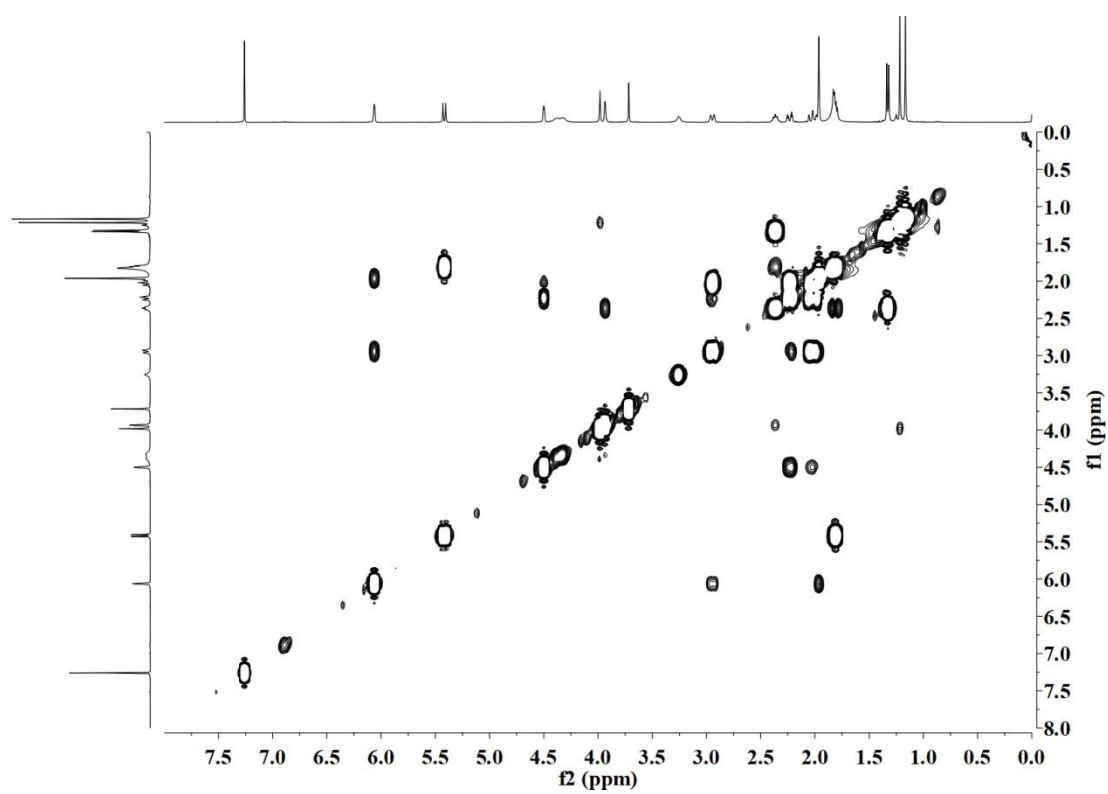

**Figure S57.**  $^1\text{H}$ - $^1\text{H}$  COSY spectrum of compound **5**



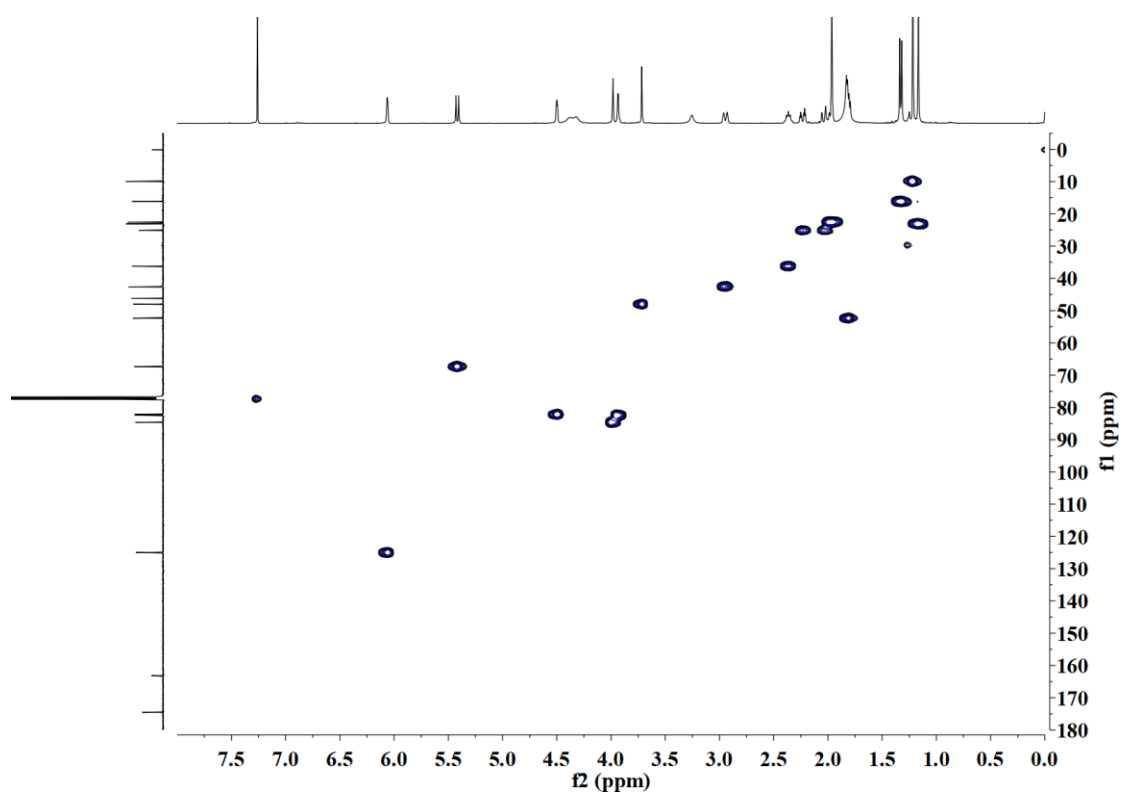

Figure S58. HSQC spectrum of compound 5

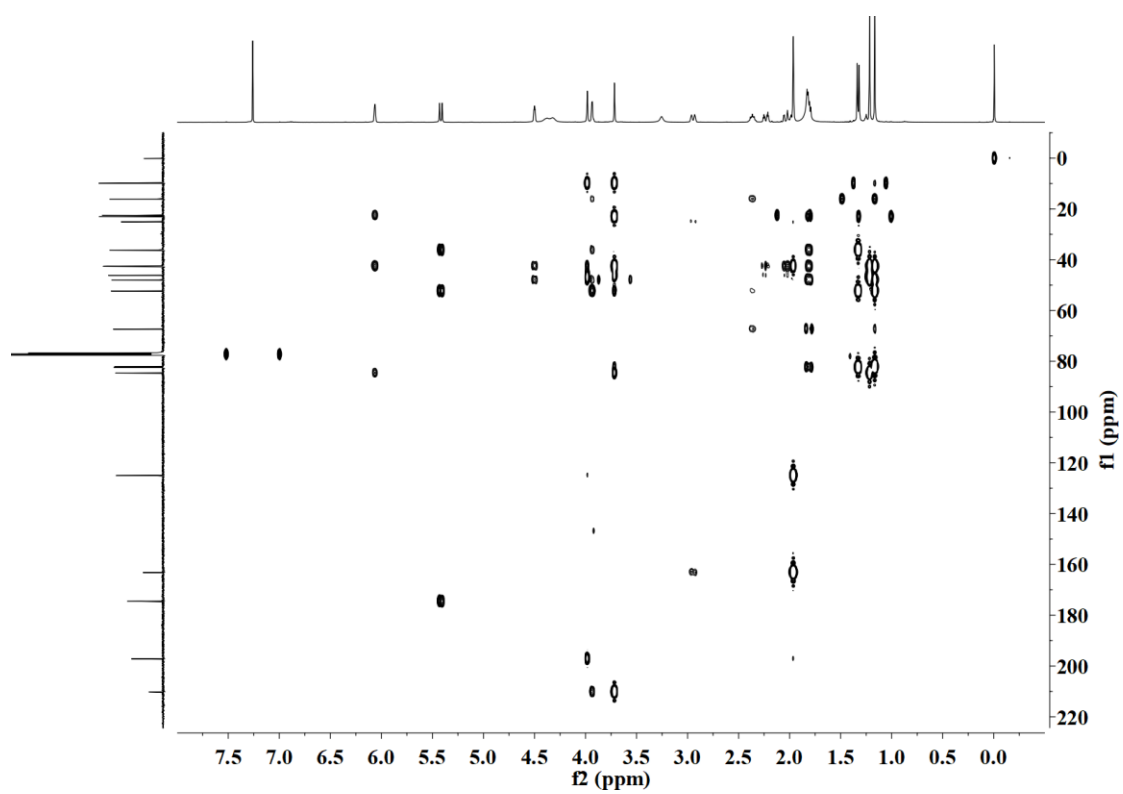

Figure S59. HMBC spectrum of compound 5

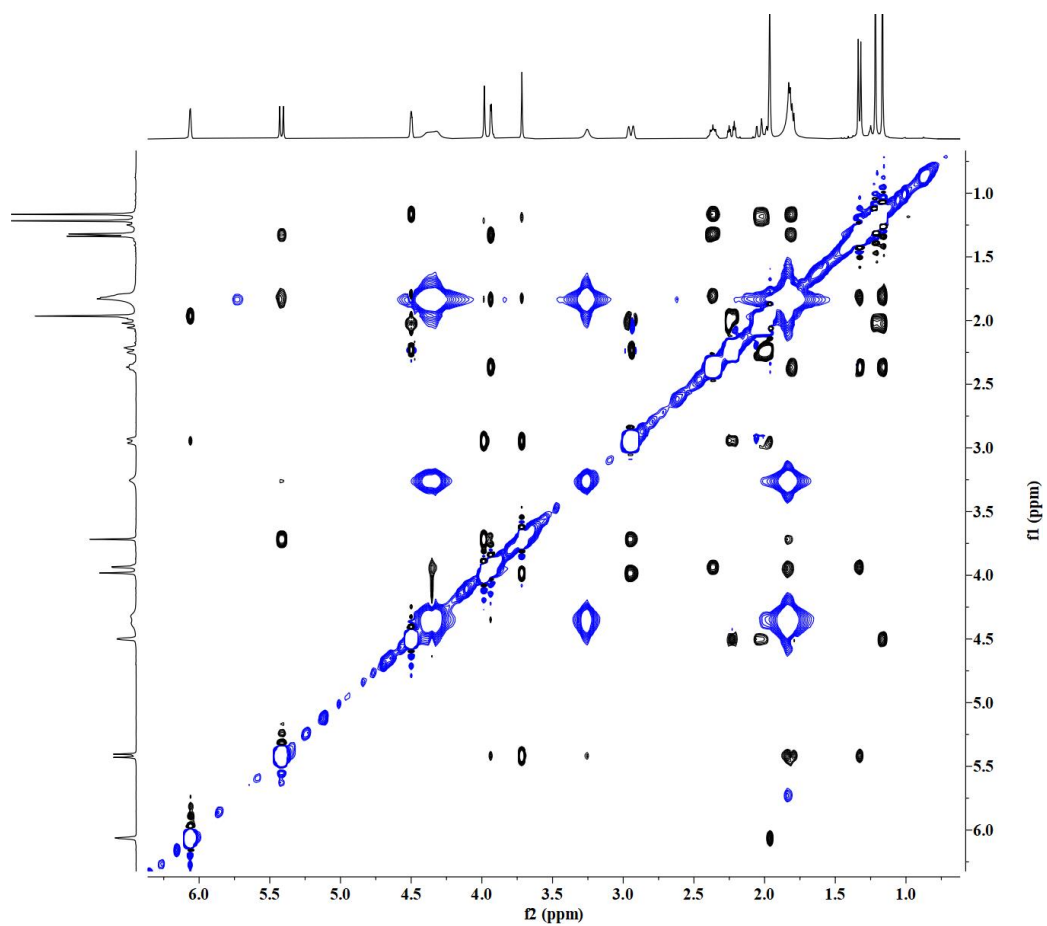

Figure S60. NOESY spectrum of compound 5

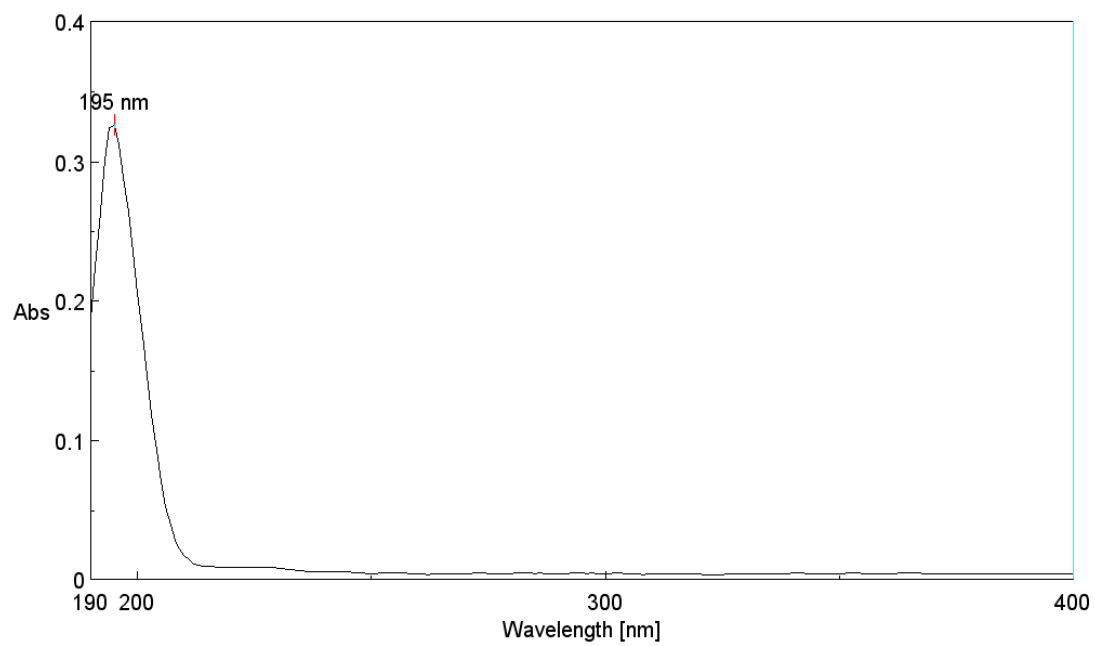

Figure S61. UV spectrum of compound 6

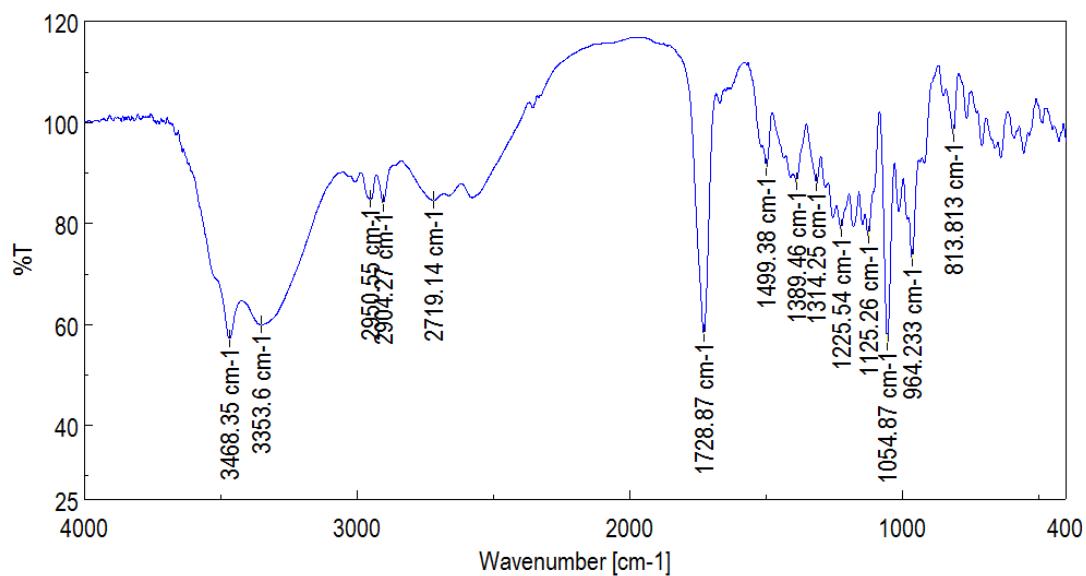

Figure S62. IR (KBr disc) spectrum of compound 6

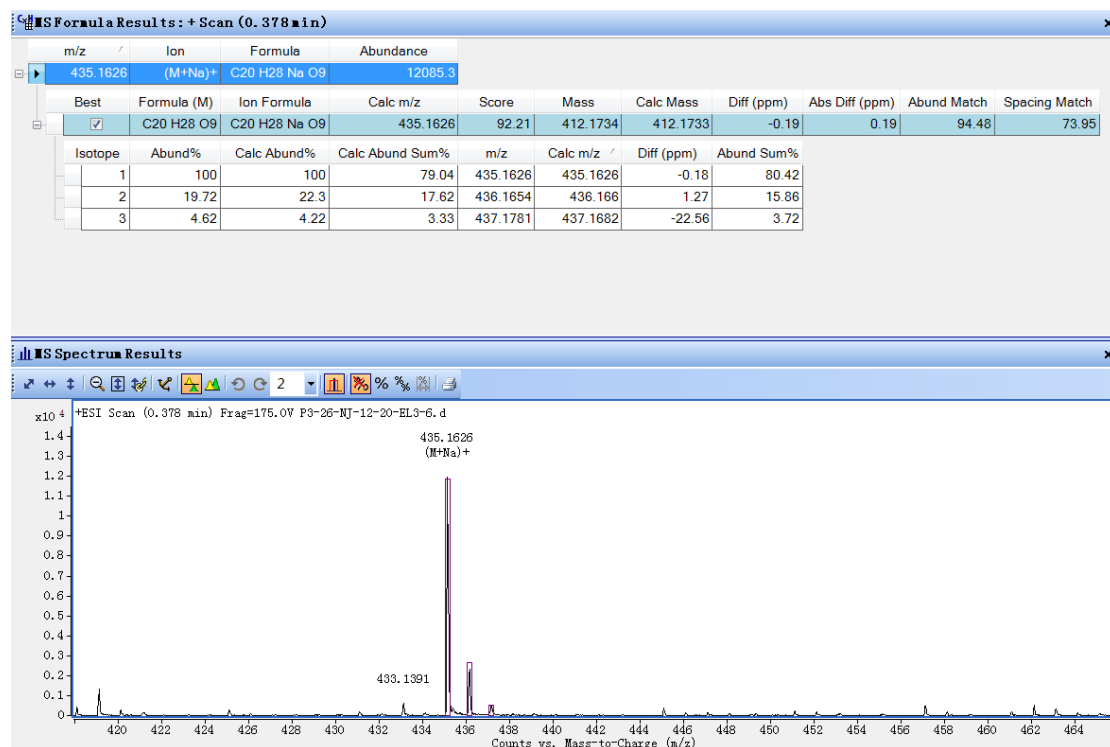

Figure S63. HR-ESI-MS spectrum of compound 6

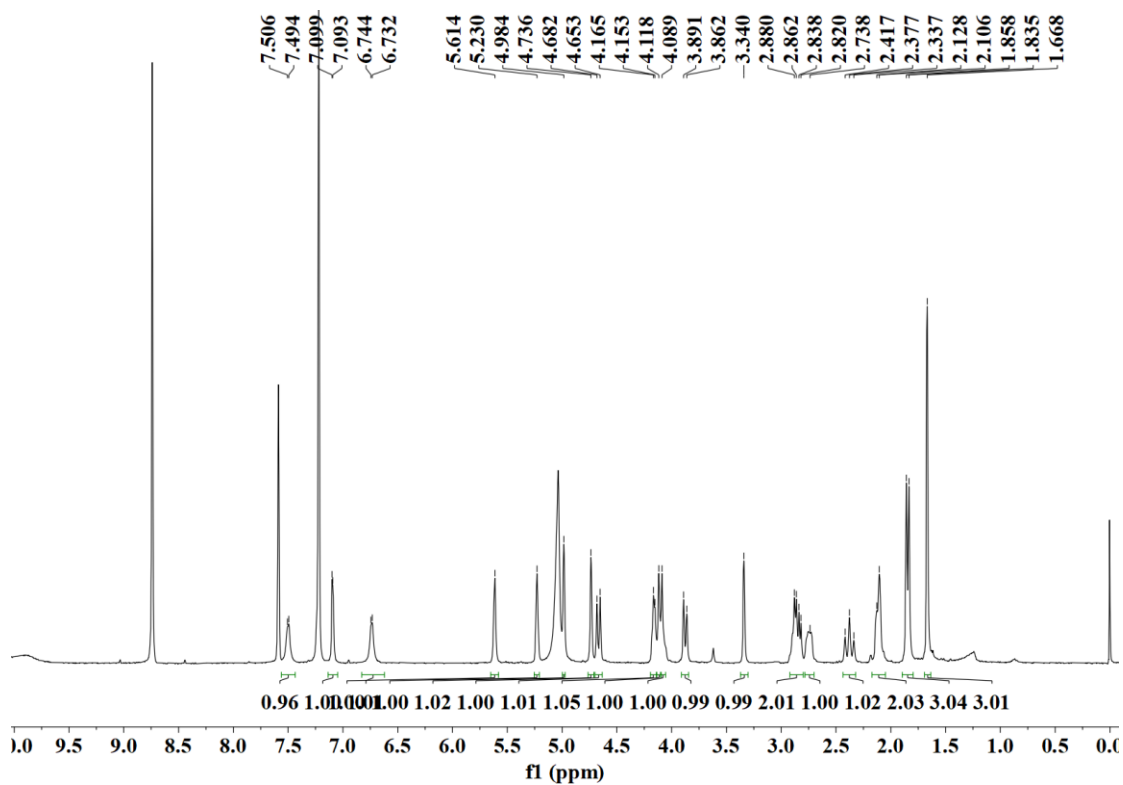

Figure S64. <sup>1</sup>H NMR spectrum of compound 6

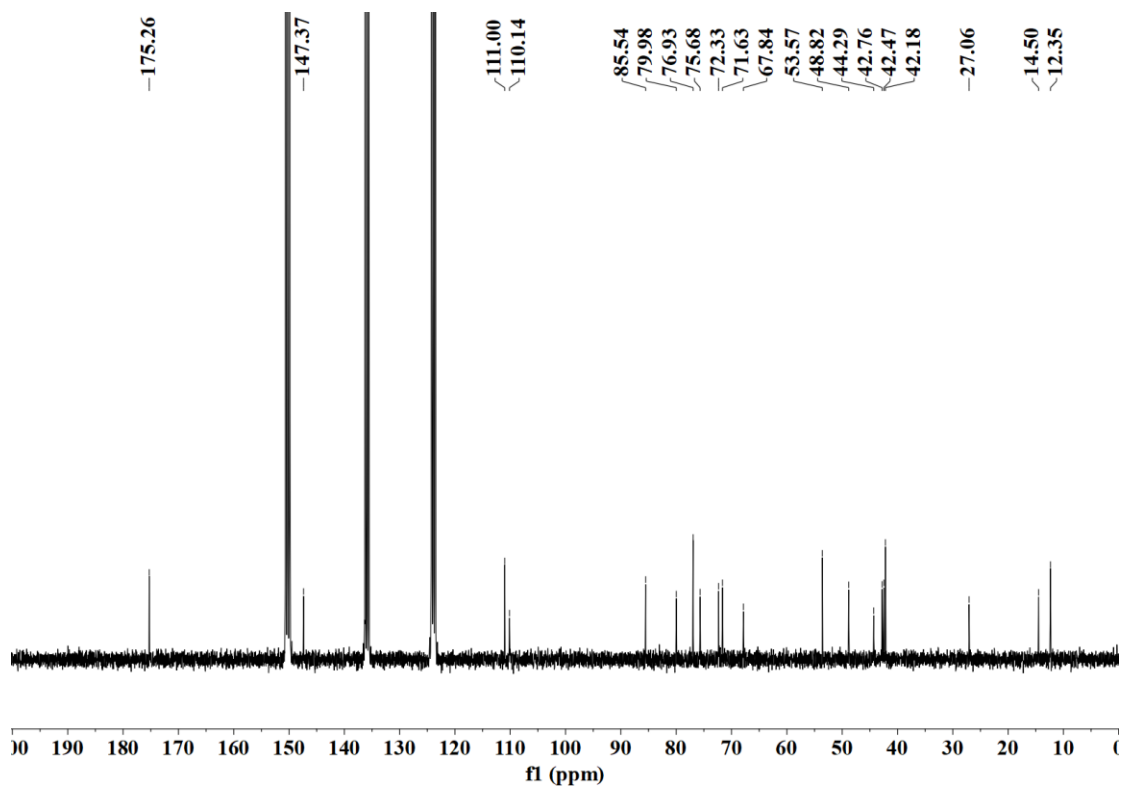

Figure S65. <sup>13</sup>C NMR spectrum of compound 6



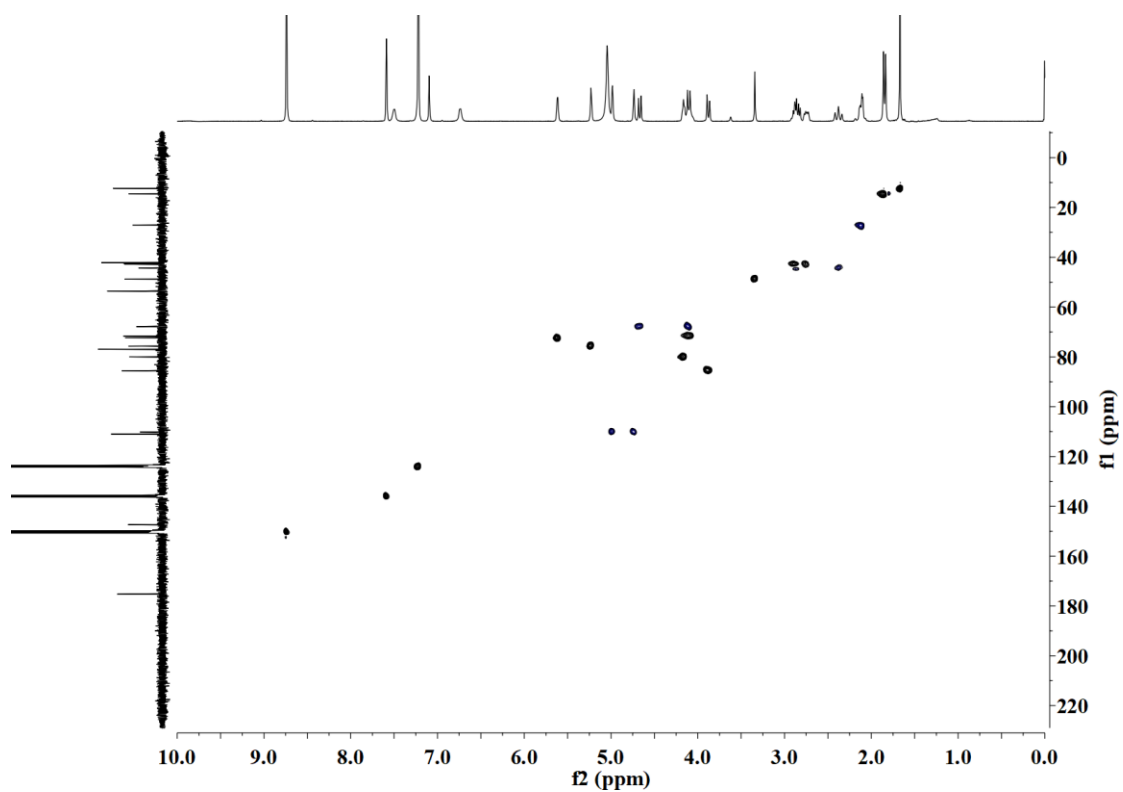

Figure S68. HSQC spectrum of compound 6

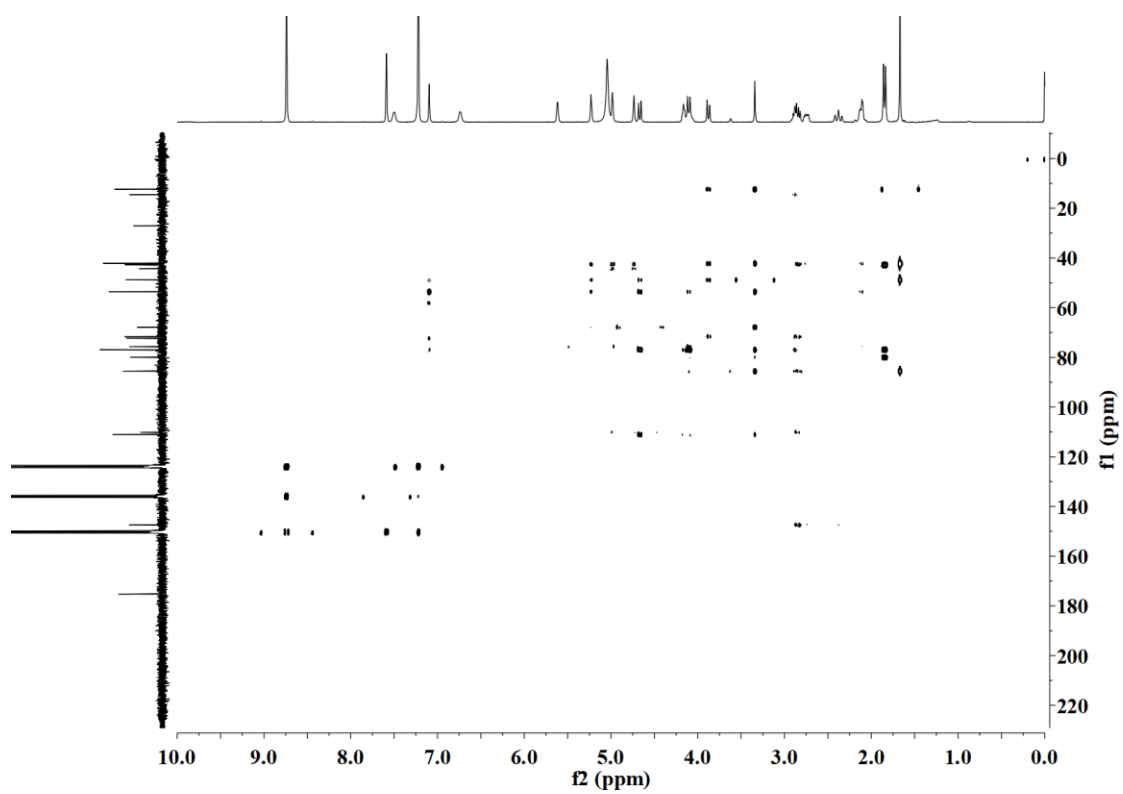

Figure S69. HMBC spectrum of compound 6

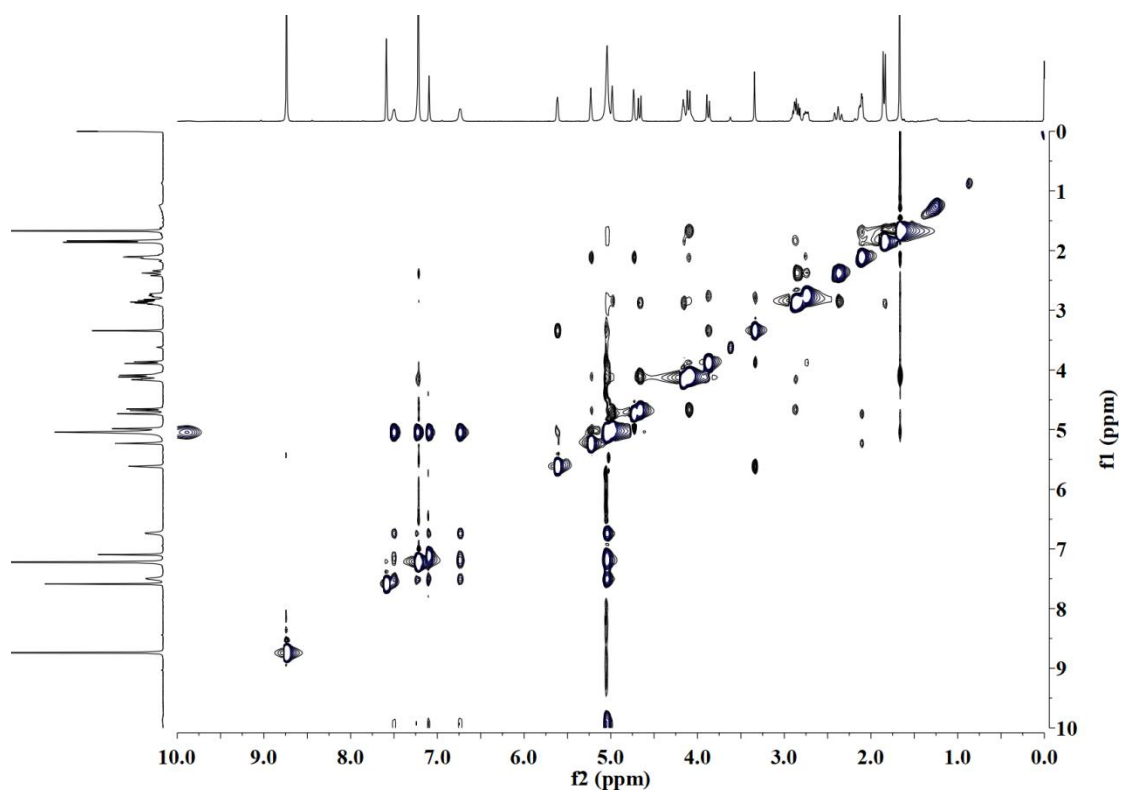

**Figure S70.** NOESY spectrum of compound 6

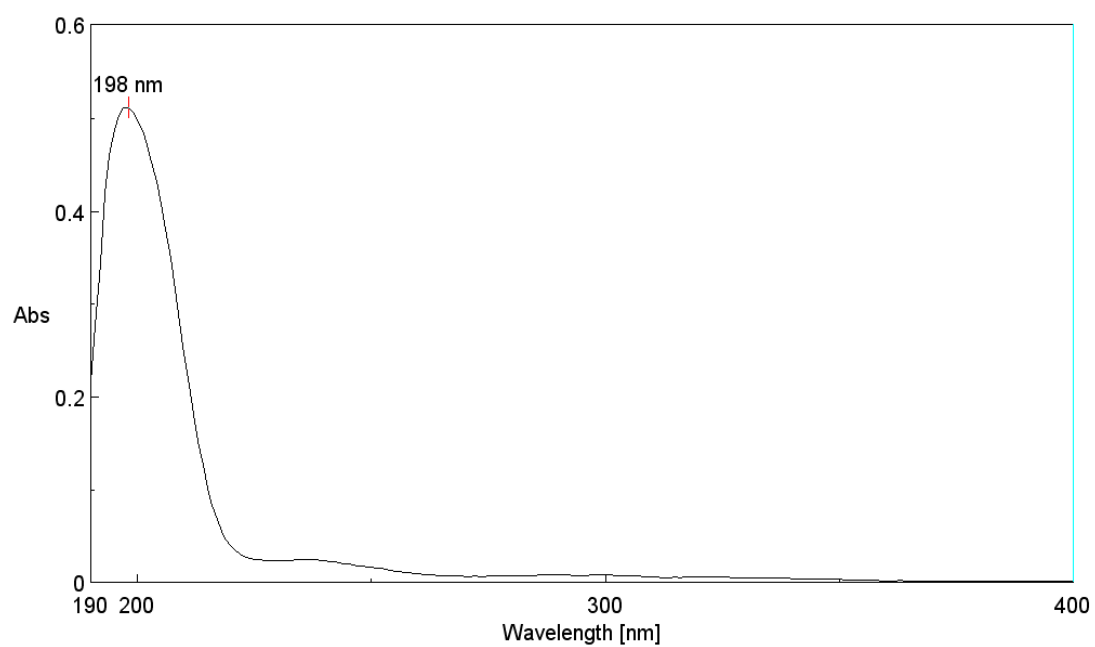

**Figure S71.** UV spectrum of compound 7

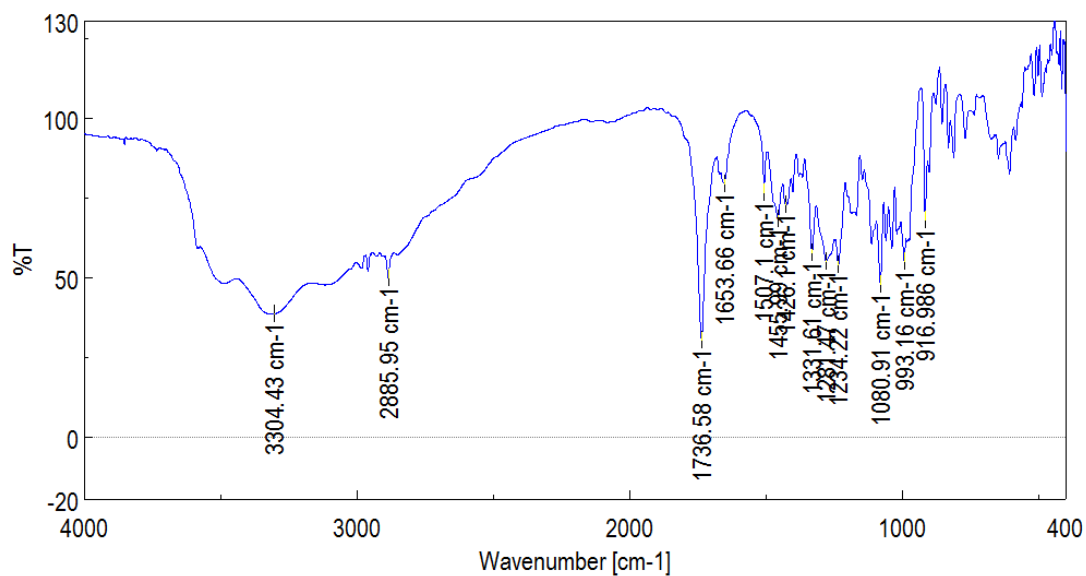

Figure S72. IR (KBr disc) spectrum of compound 7

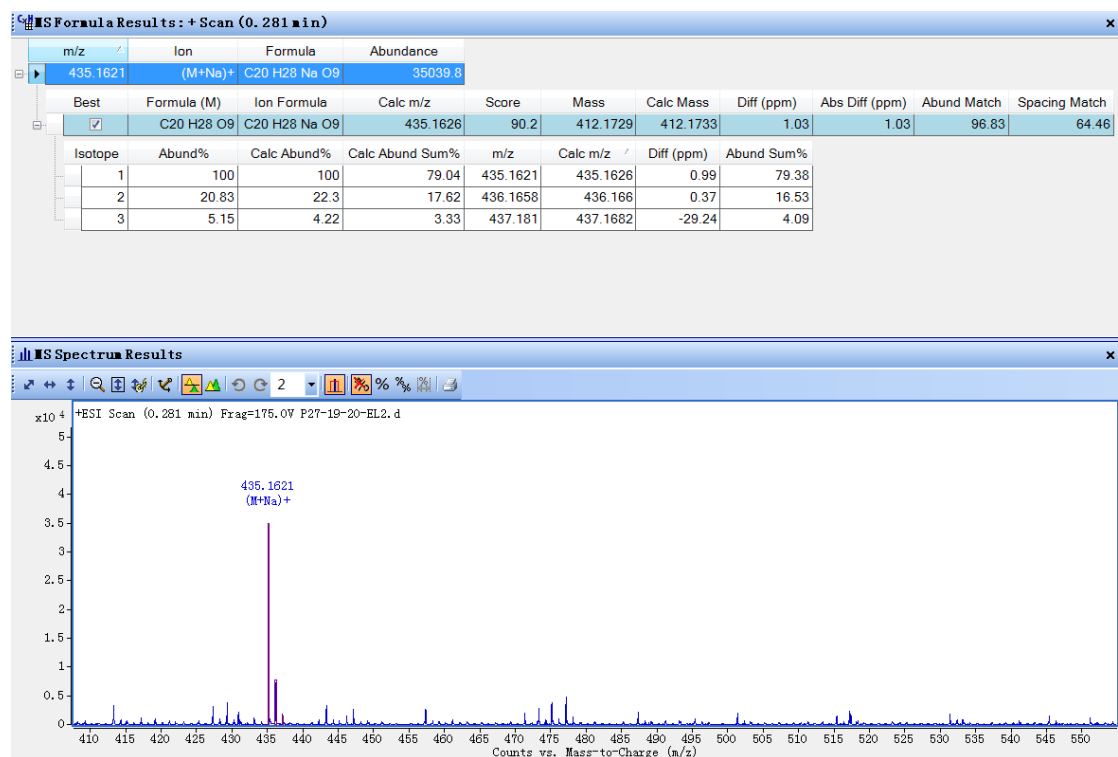

Figure S73. HR-ESI-MS spectrum of compound 7



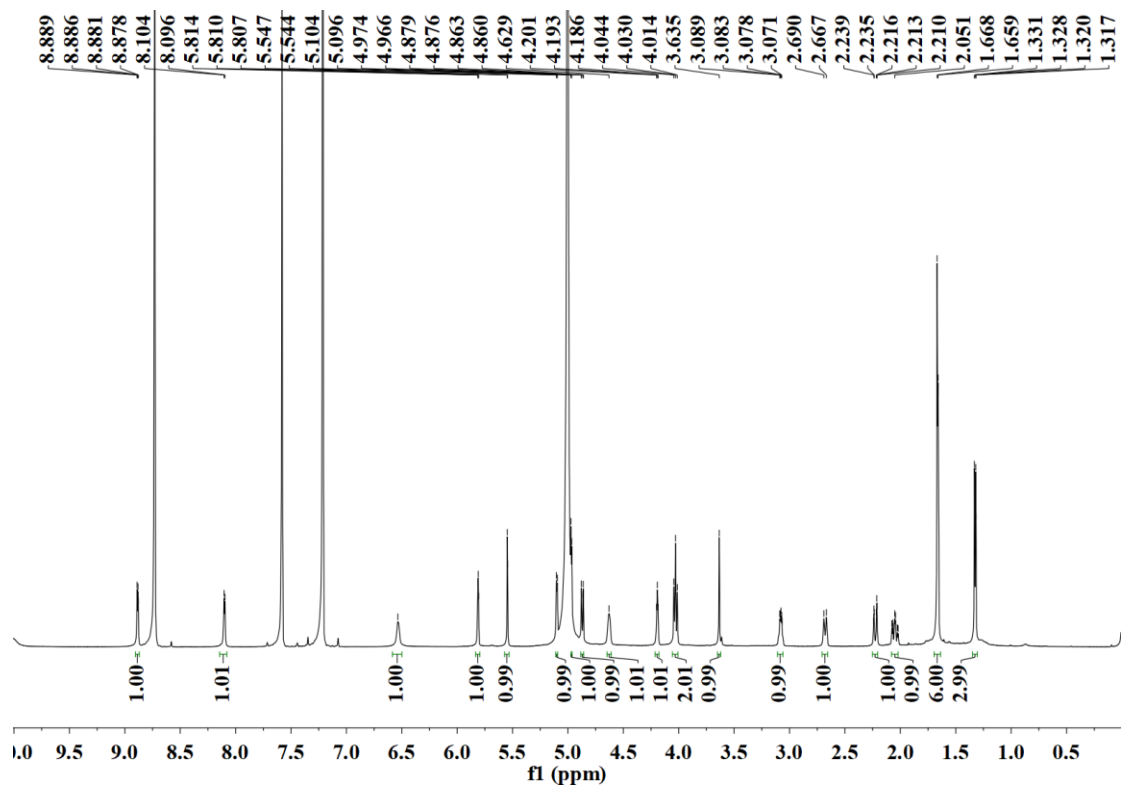

Figure S74.  $^1\text{H}$  NMR spectrum of compound 7

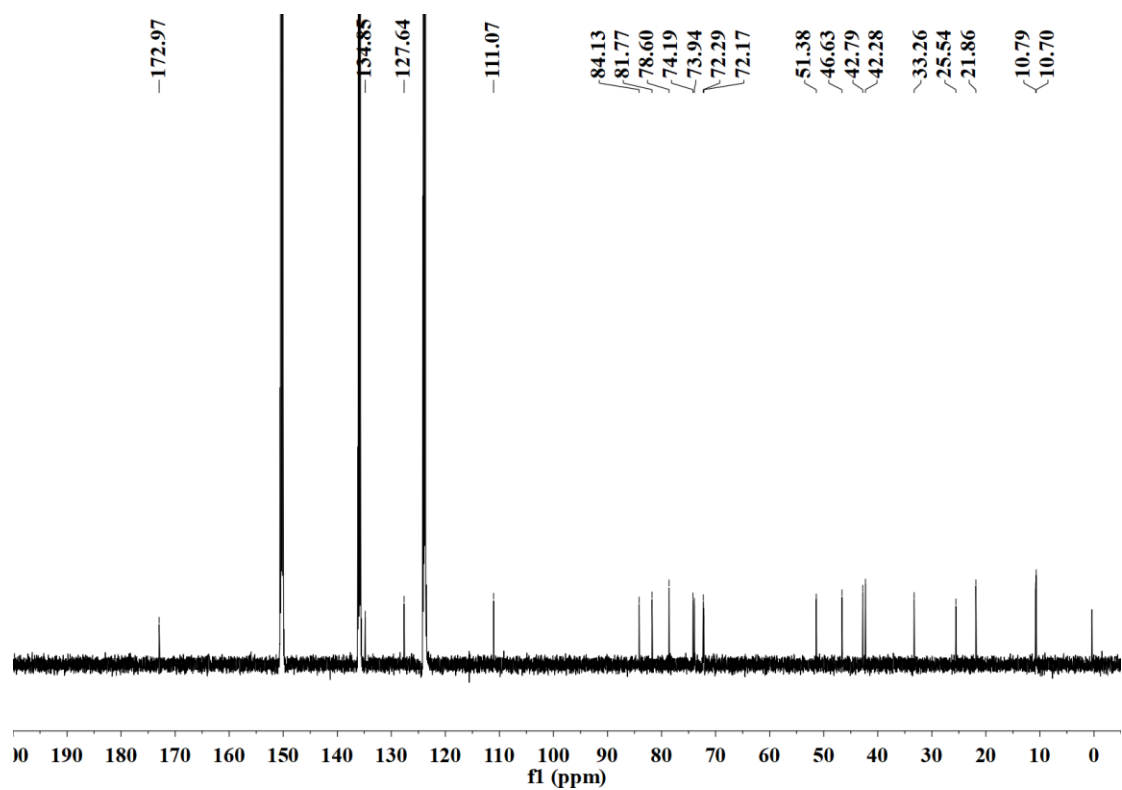

Figure S75.  $^{13}\text{C}$  NMR spectrum of compound 7

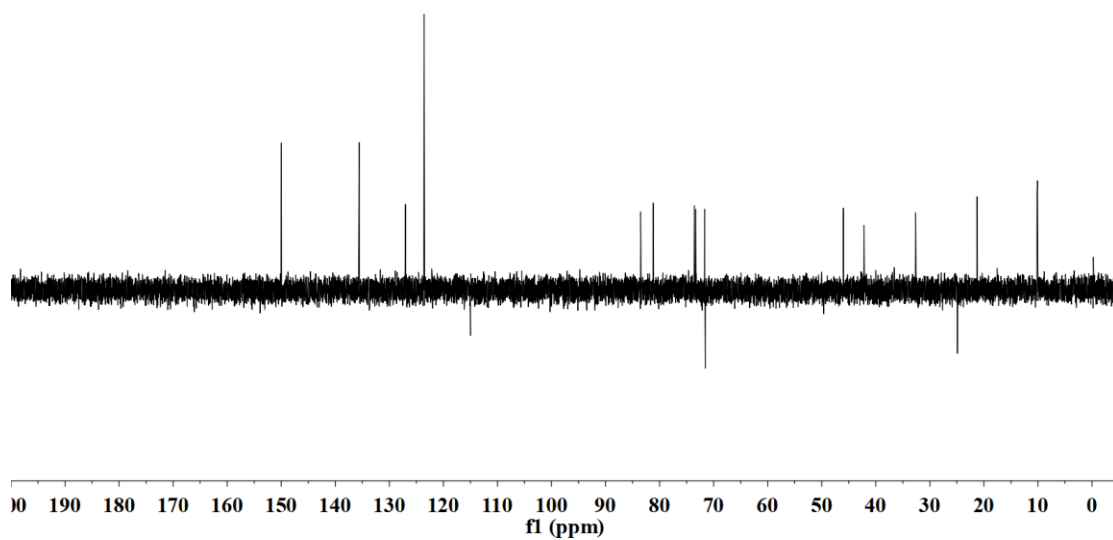

**Figure S76.** DEPT-135 spectrum of compound **7**

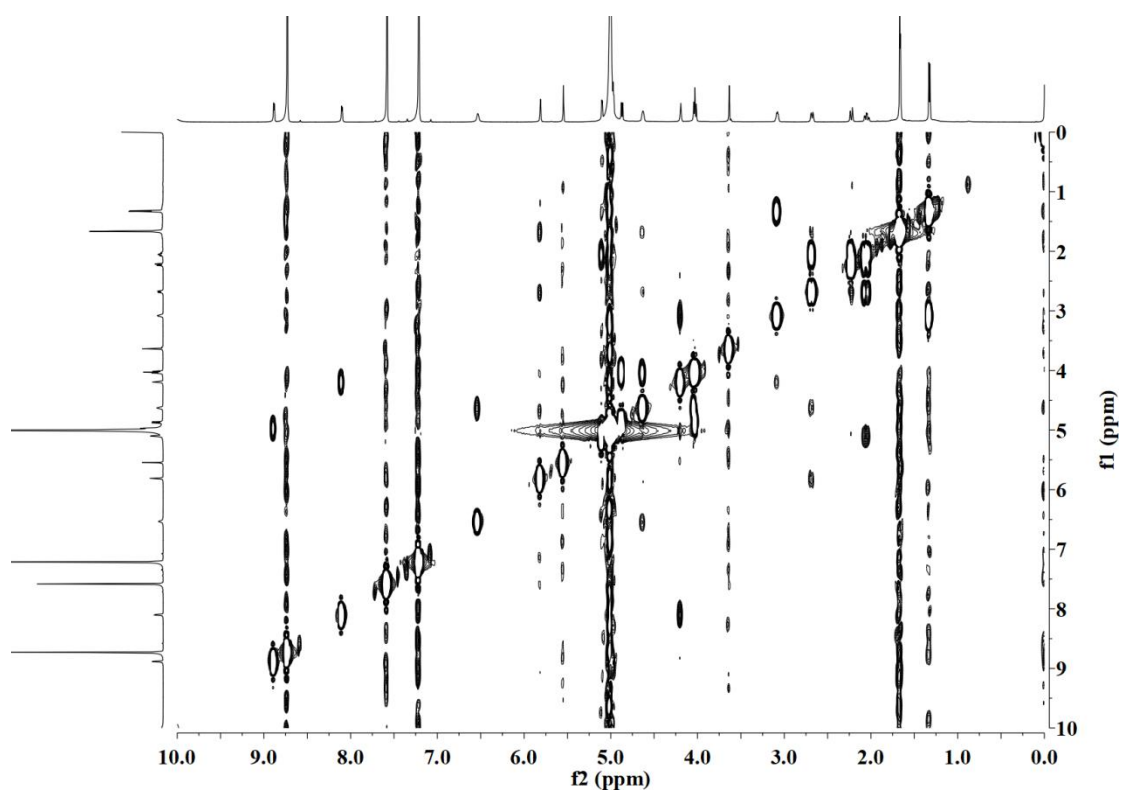

**Figure S77.**  $^1\text{H}$ - $^1\text{H}$  COSY spectrum of compound **7**

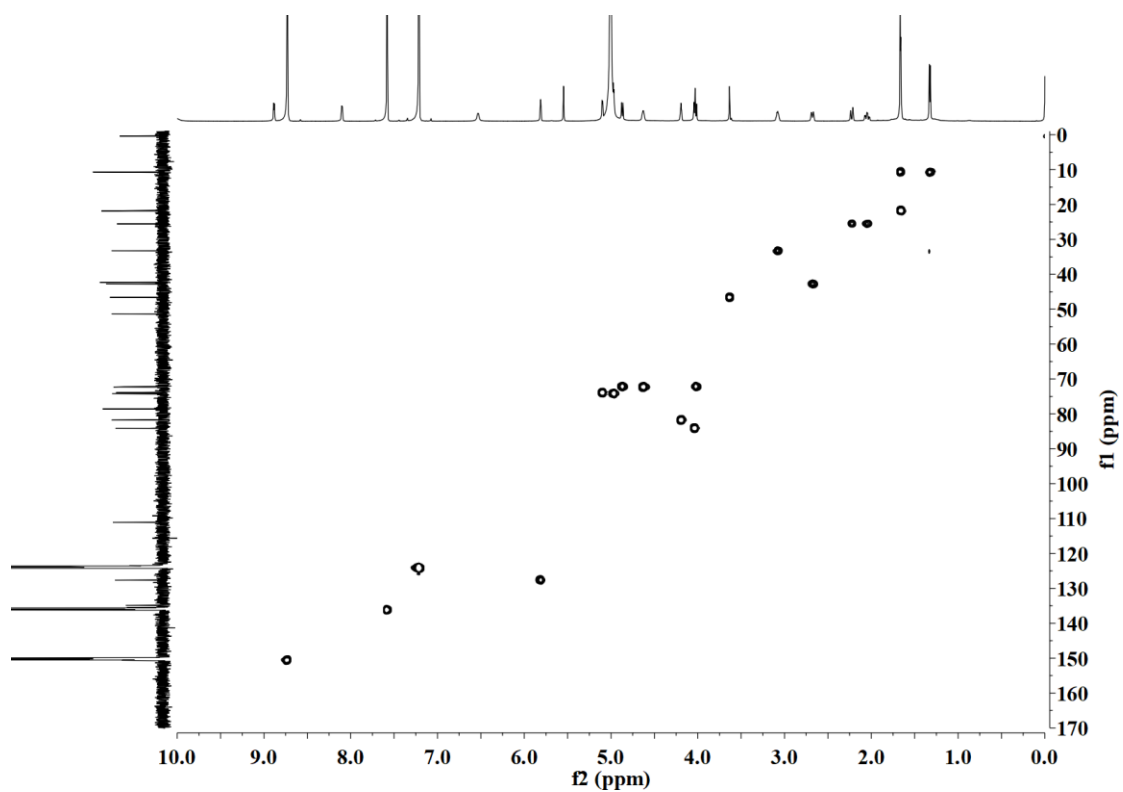

Figure S78. HSQC spectrum of compound 7

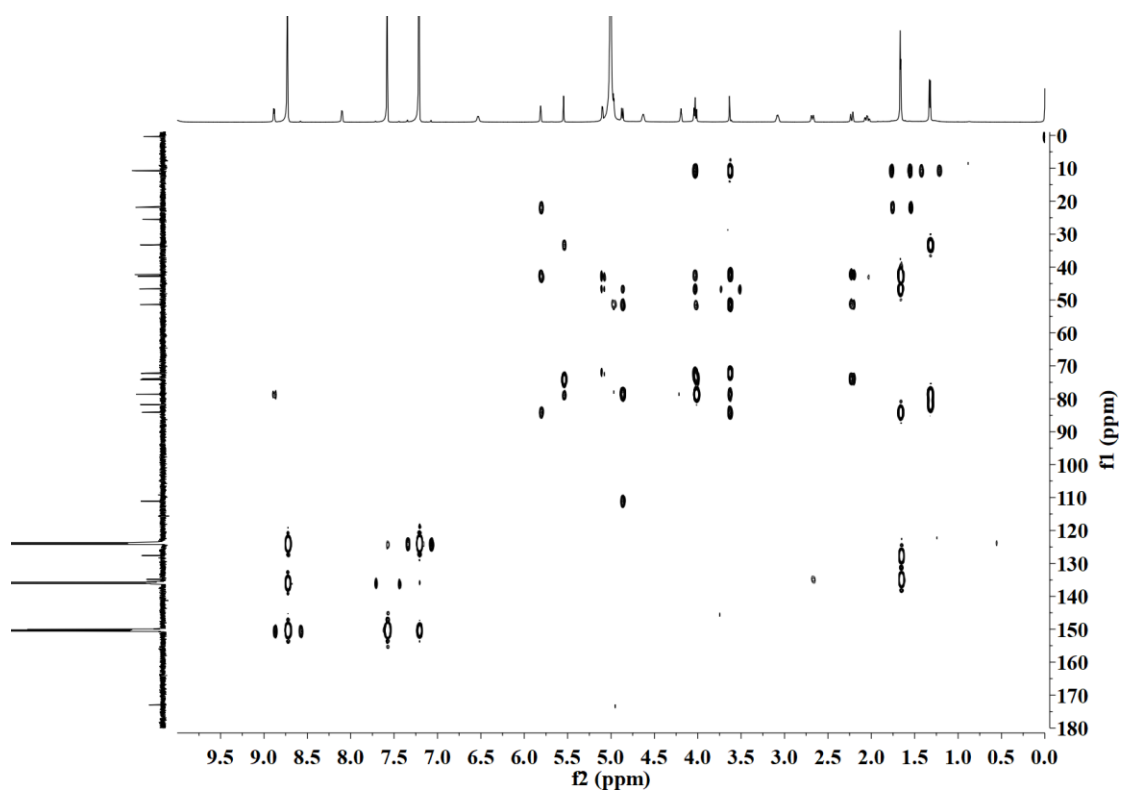

Figure S79. HMBC spectrum of compound 7

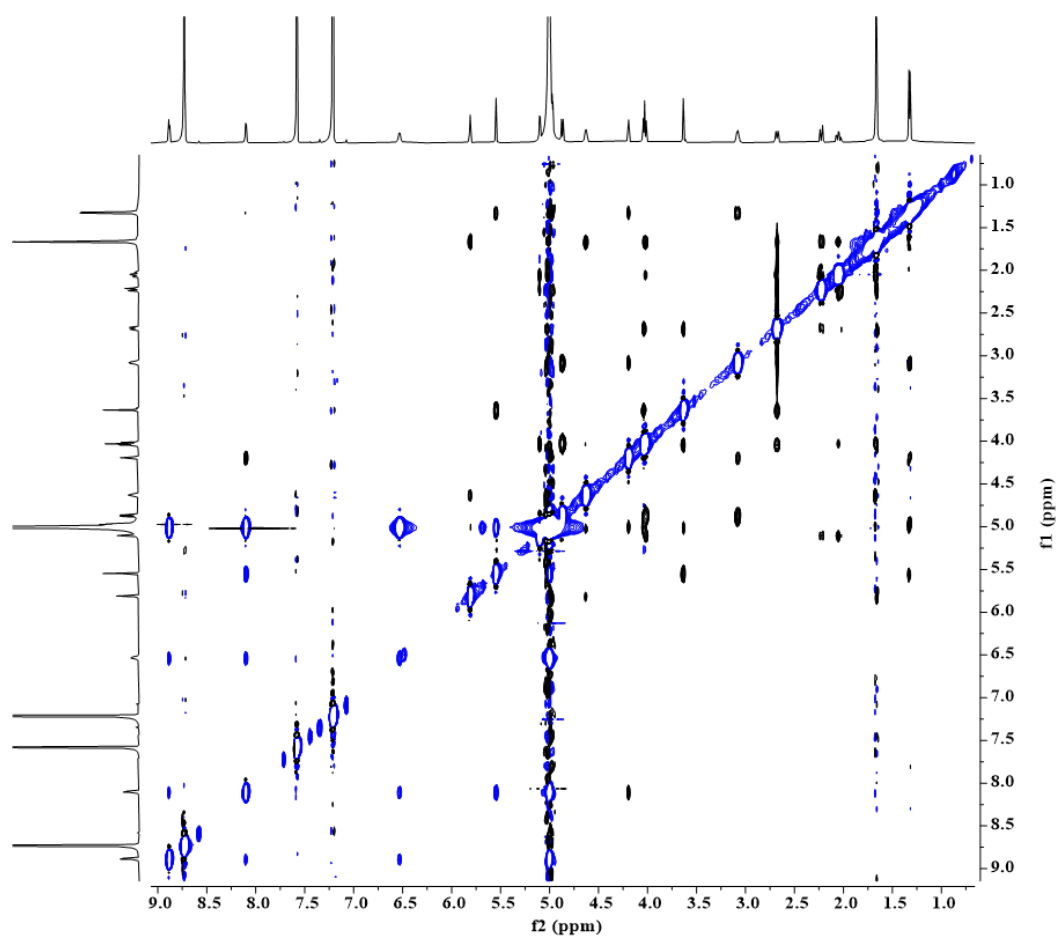

Figure S80. NOESY spectrum of compound 7

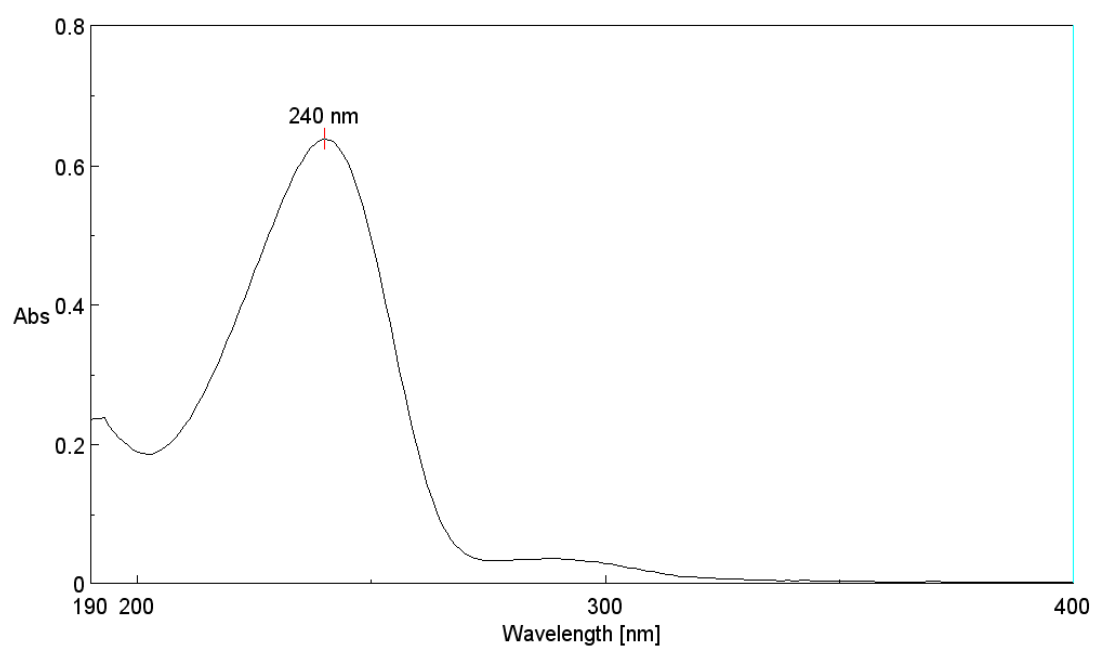

Figure S81. UV spectrum of compound 8

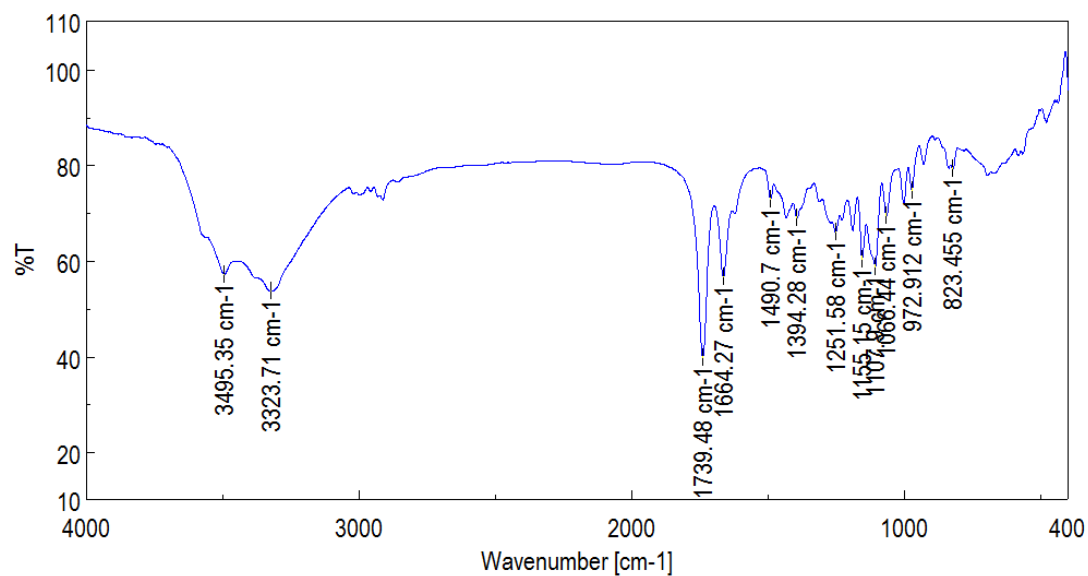

Figure S82. IR (KBr disc) spectrum of compound 8

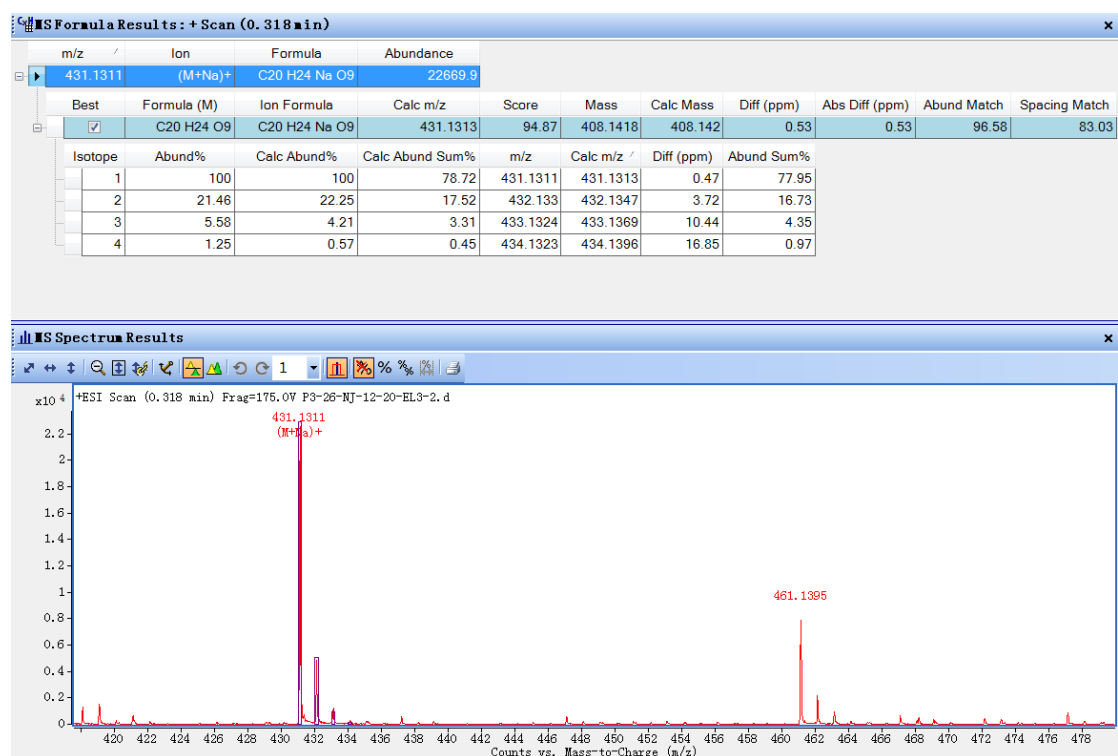

Figure S83. HR-ESI-MS spectrum of compound 8

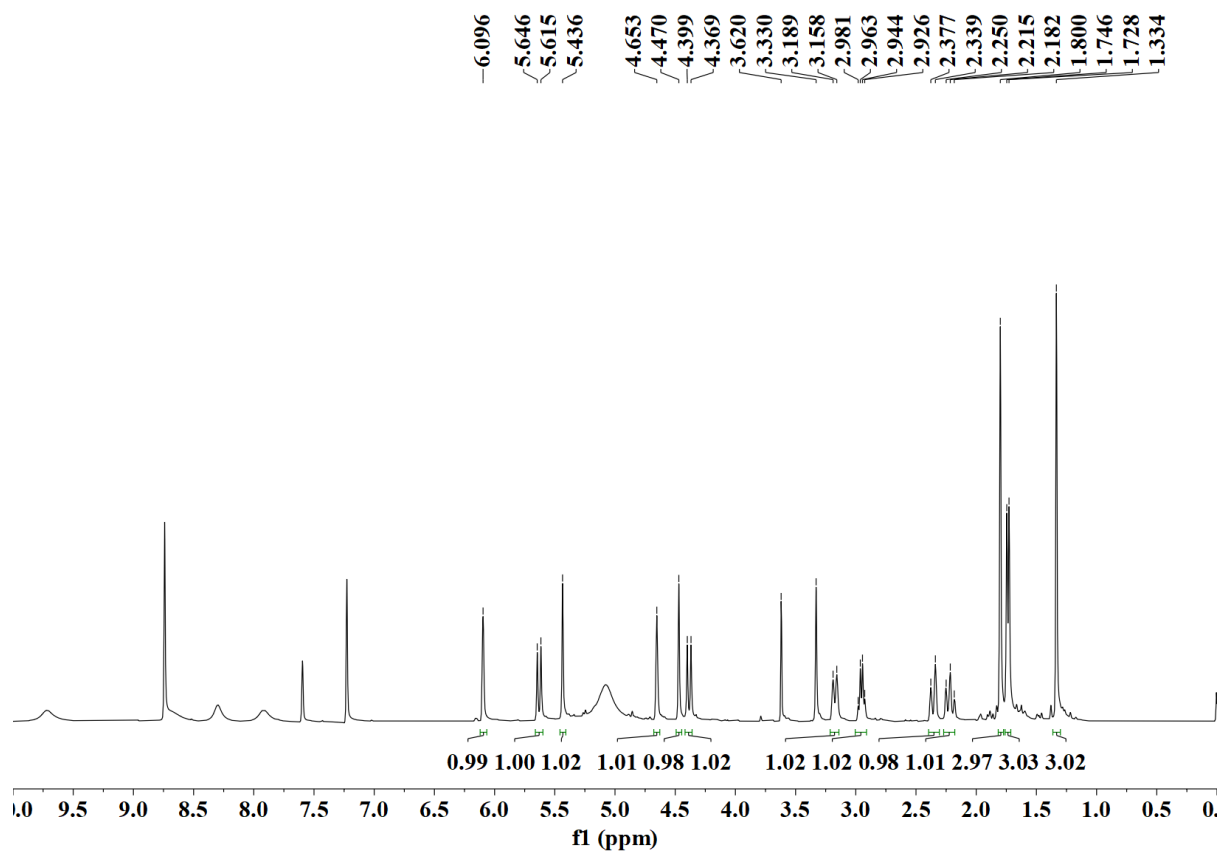

Figure S84.  $^1\text{H}$  NMR spectrum of compound 8

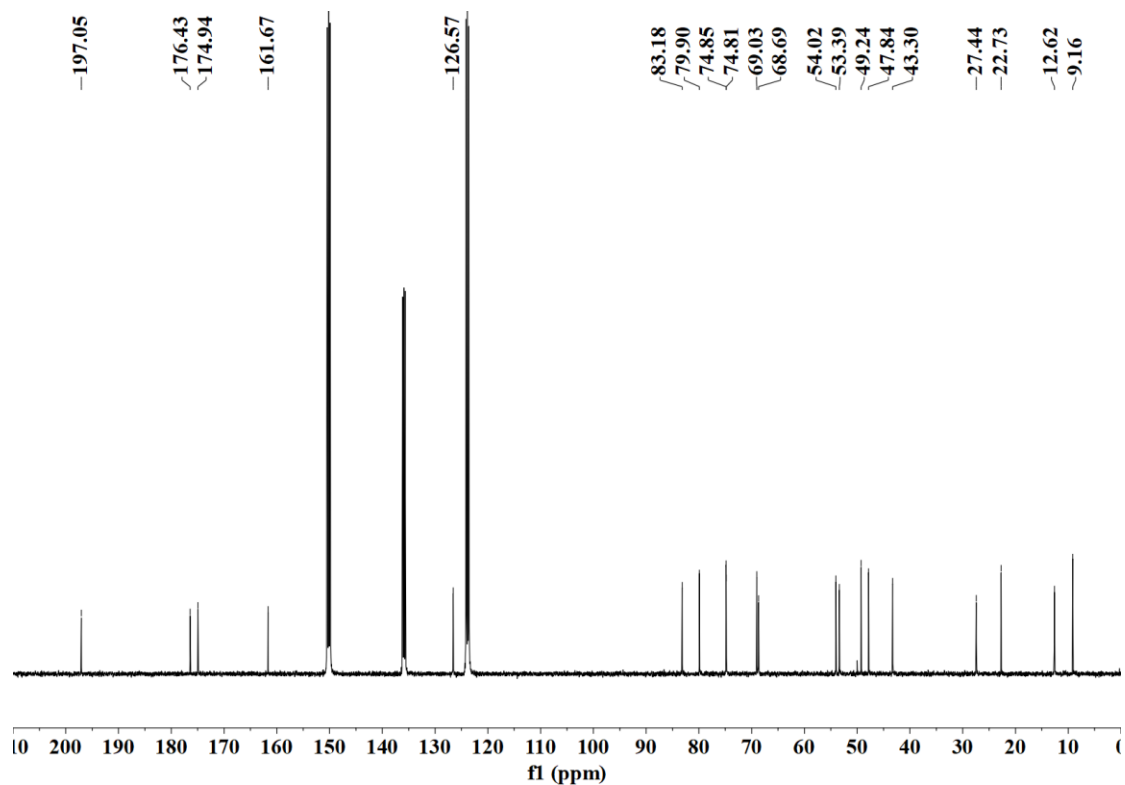

Figure S85.  $^{13}\text{C}$  NMR spectrum of compound 8

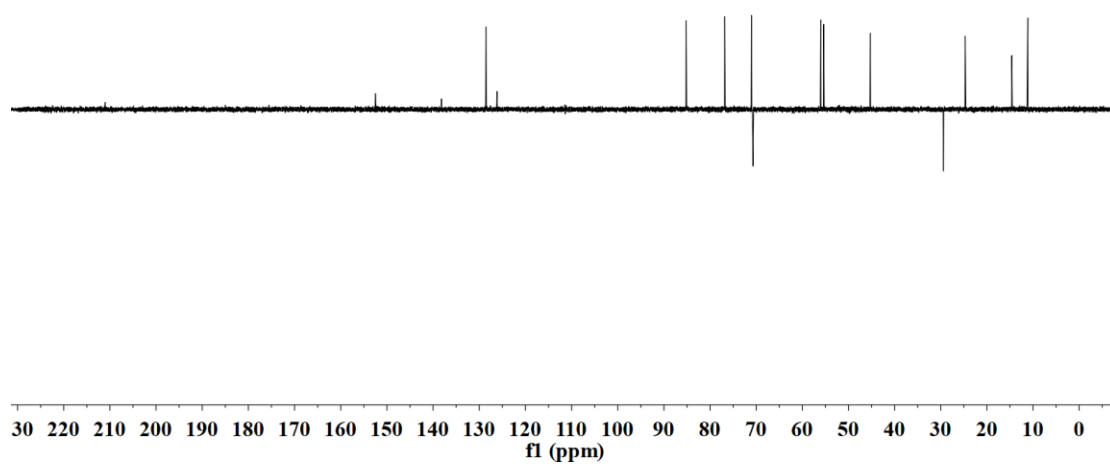

**Figure S86.** DEPT-135 spectrum of compound 8

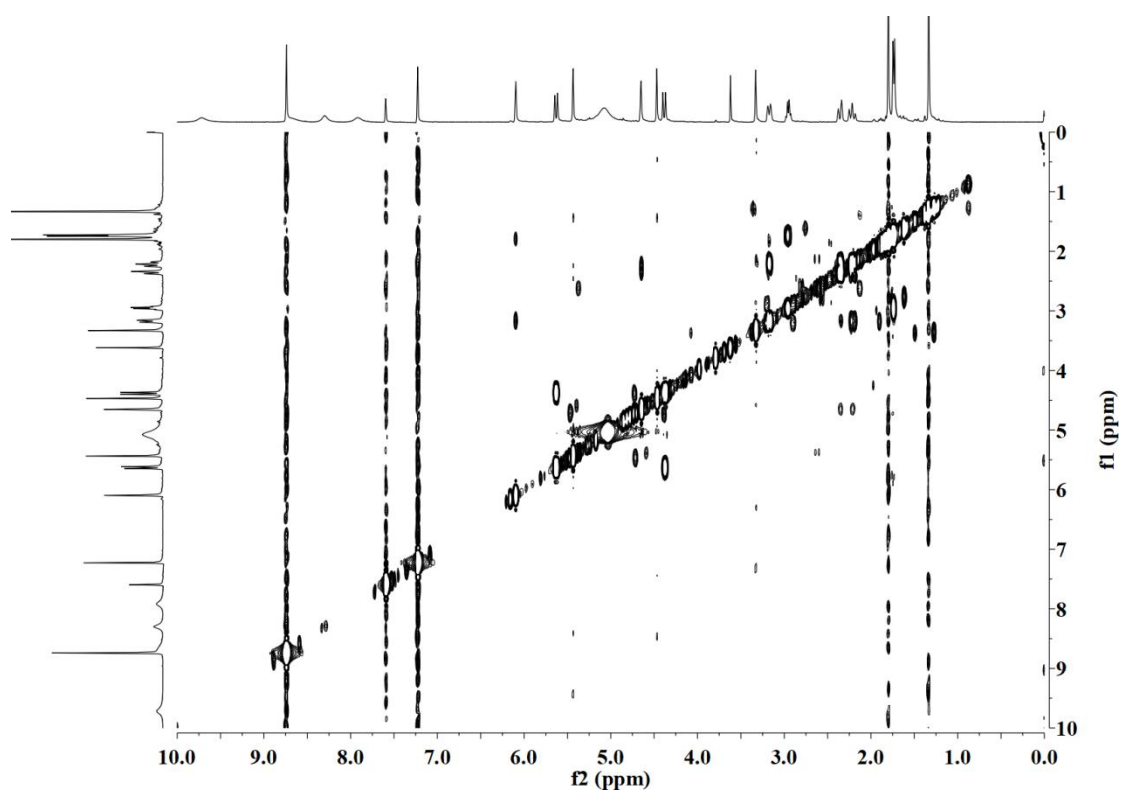

**Figure S87.**  $^1\text{H}$ - $^1\text{H}$  COSY spectrum of compound 8

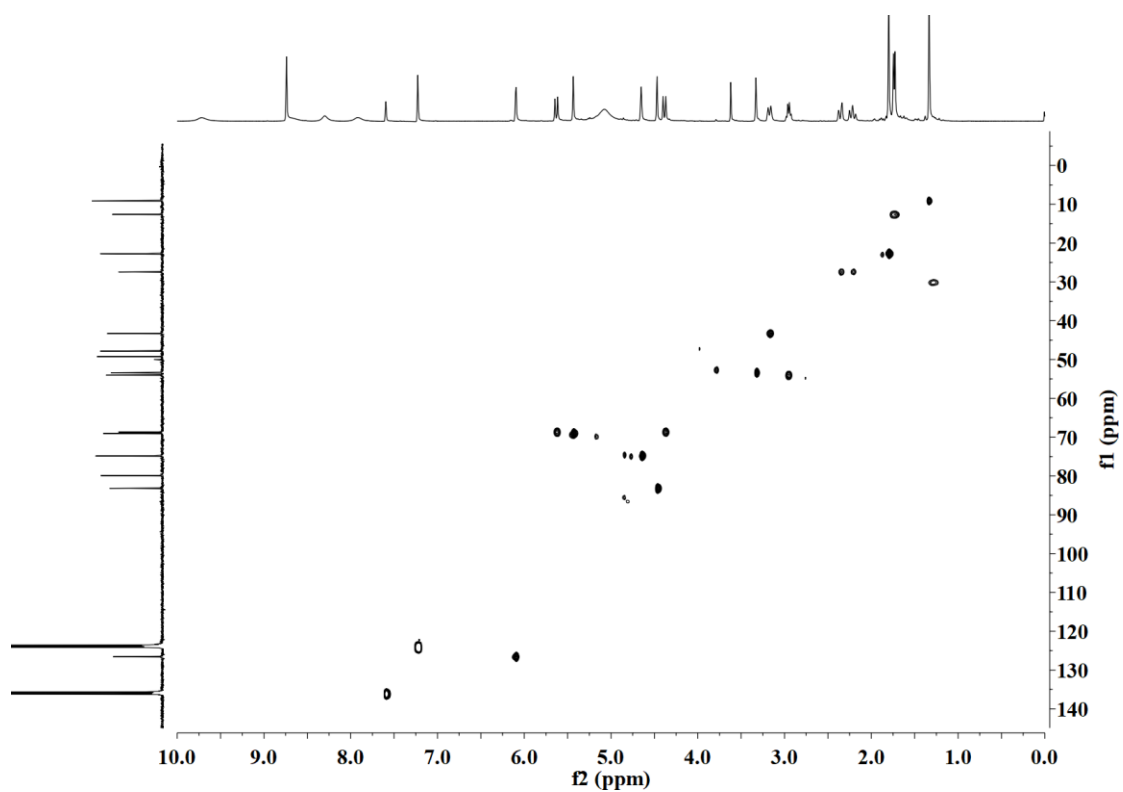

Figure S88. HSQC spectrum of compound 8

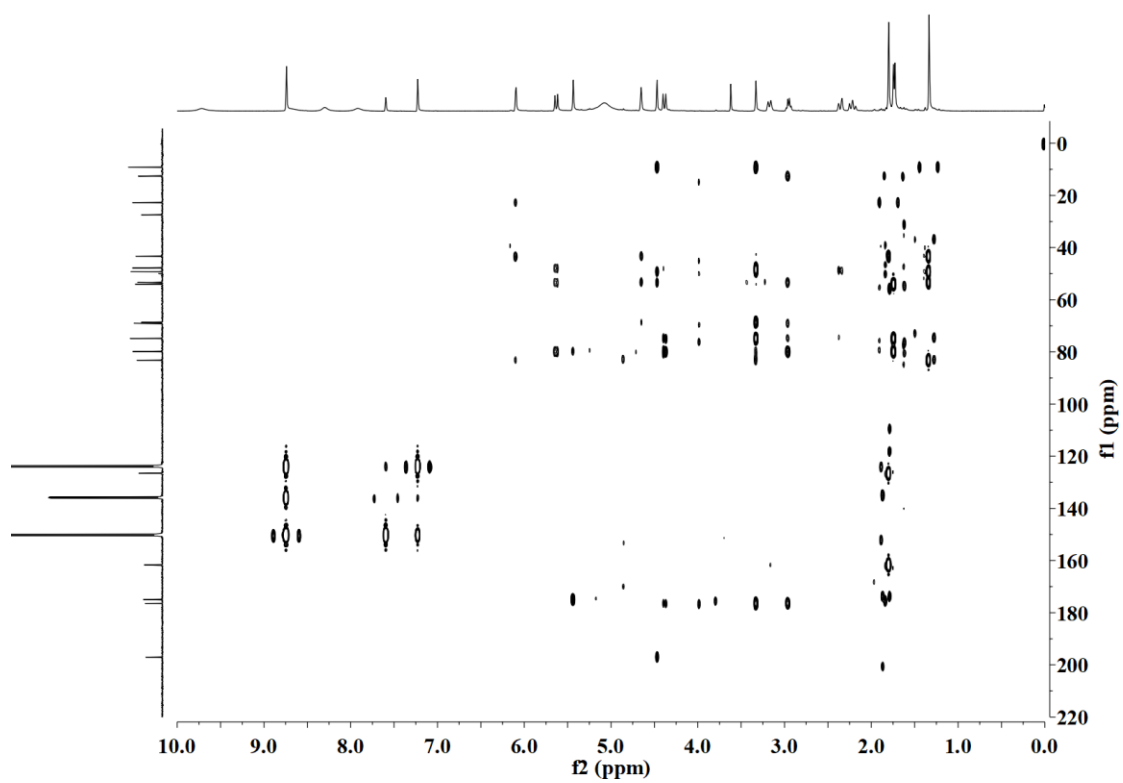

Figure S89. HMBC spectrum of compound 8



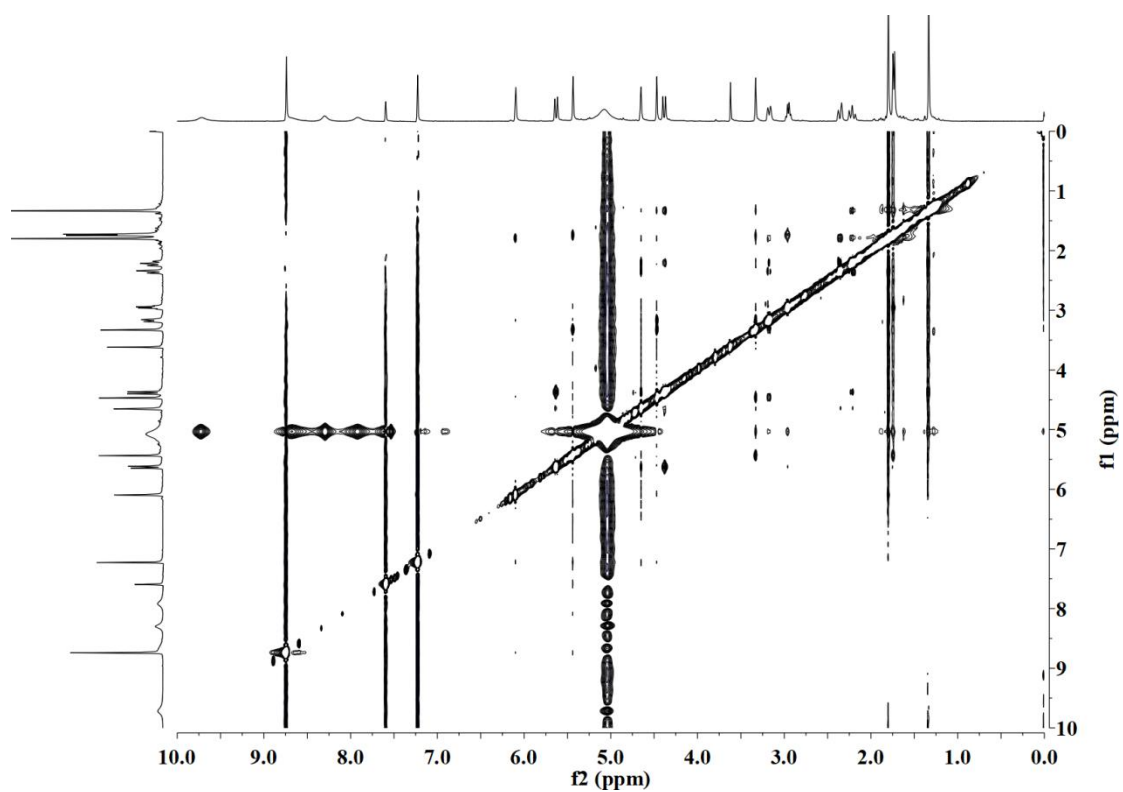

Figure S90. NOESY spectrum of compound 8

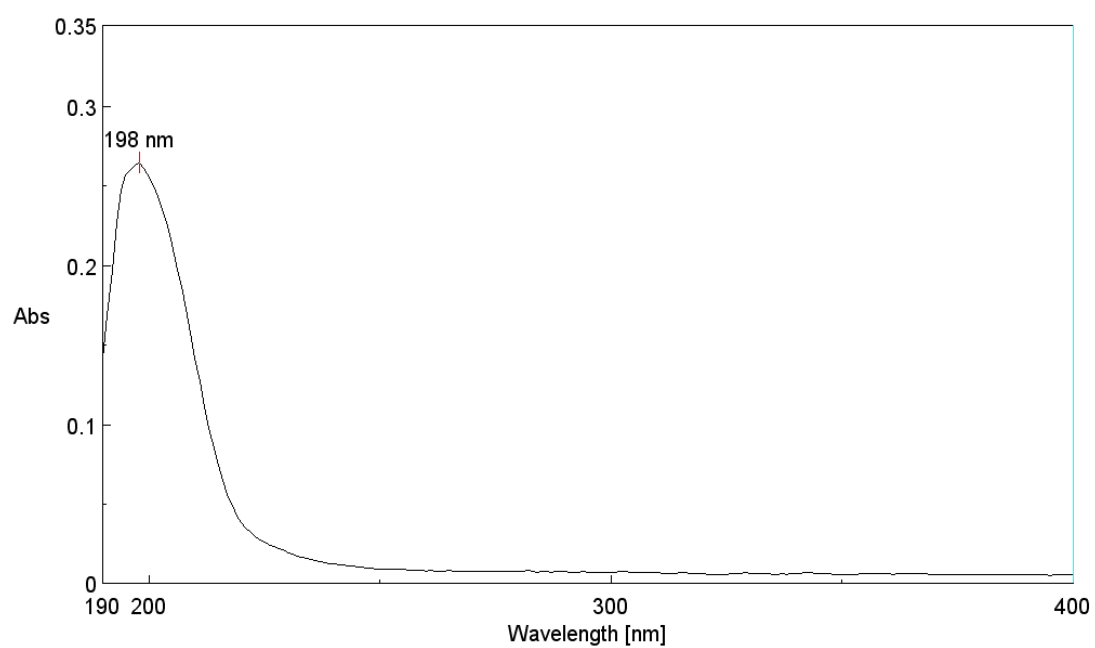

Figure S91. UV spectrum of compound 9

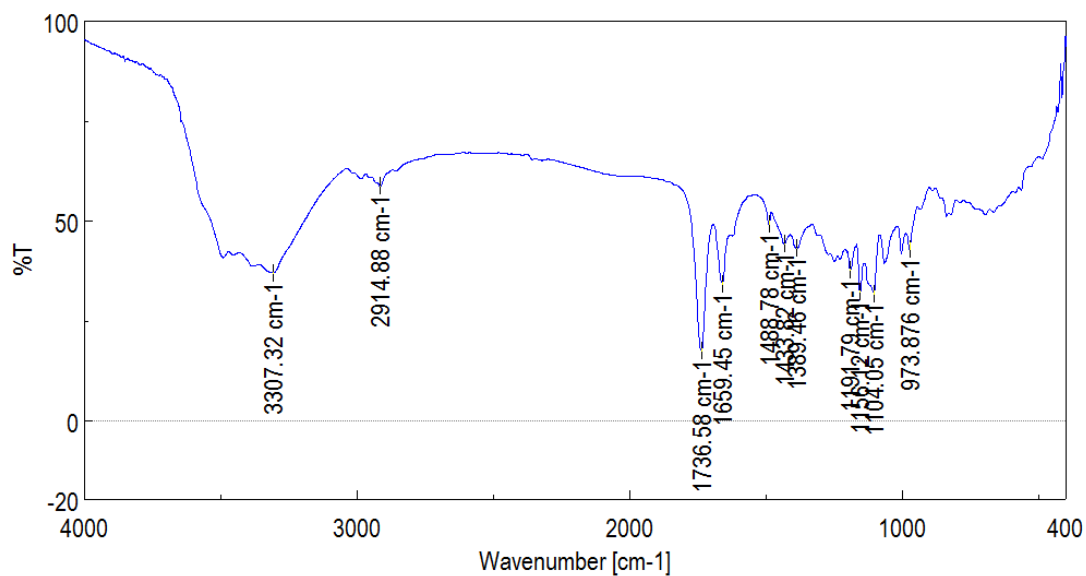

Figure S92. IR (KBr disc) spectrum of compound 9

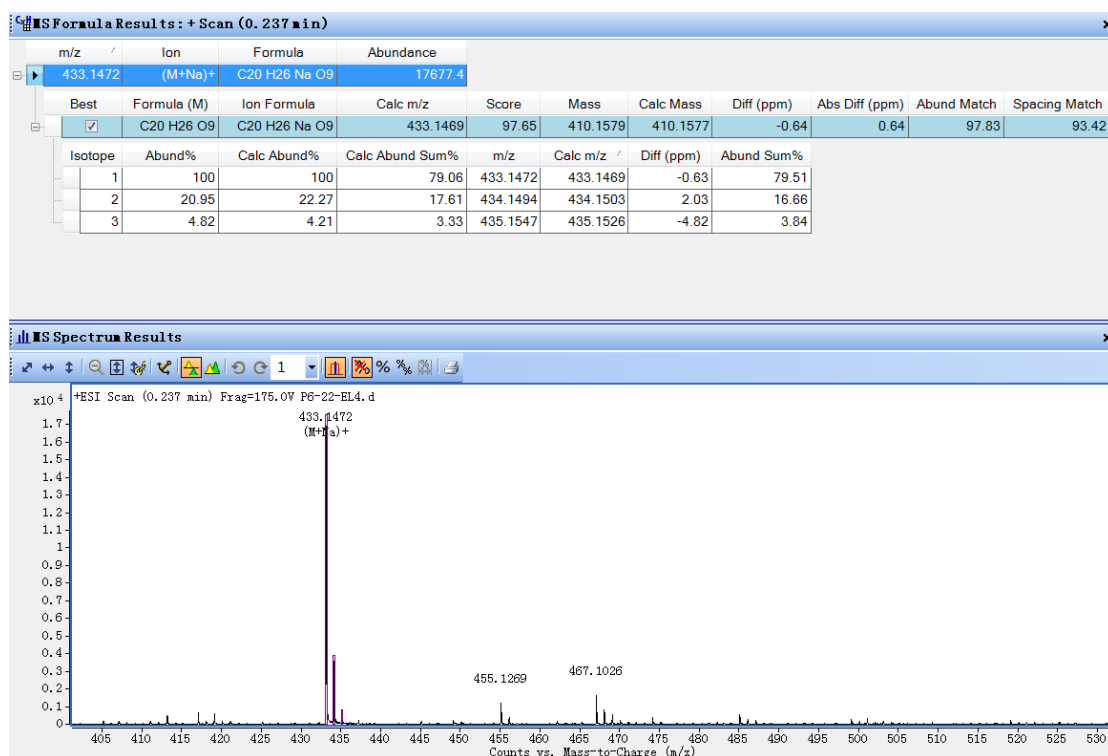

Figure S93. HR-ESI-MS spectrum of compound 9

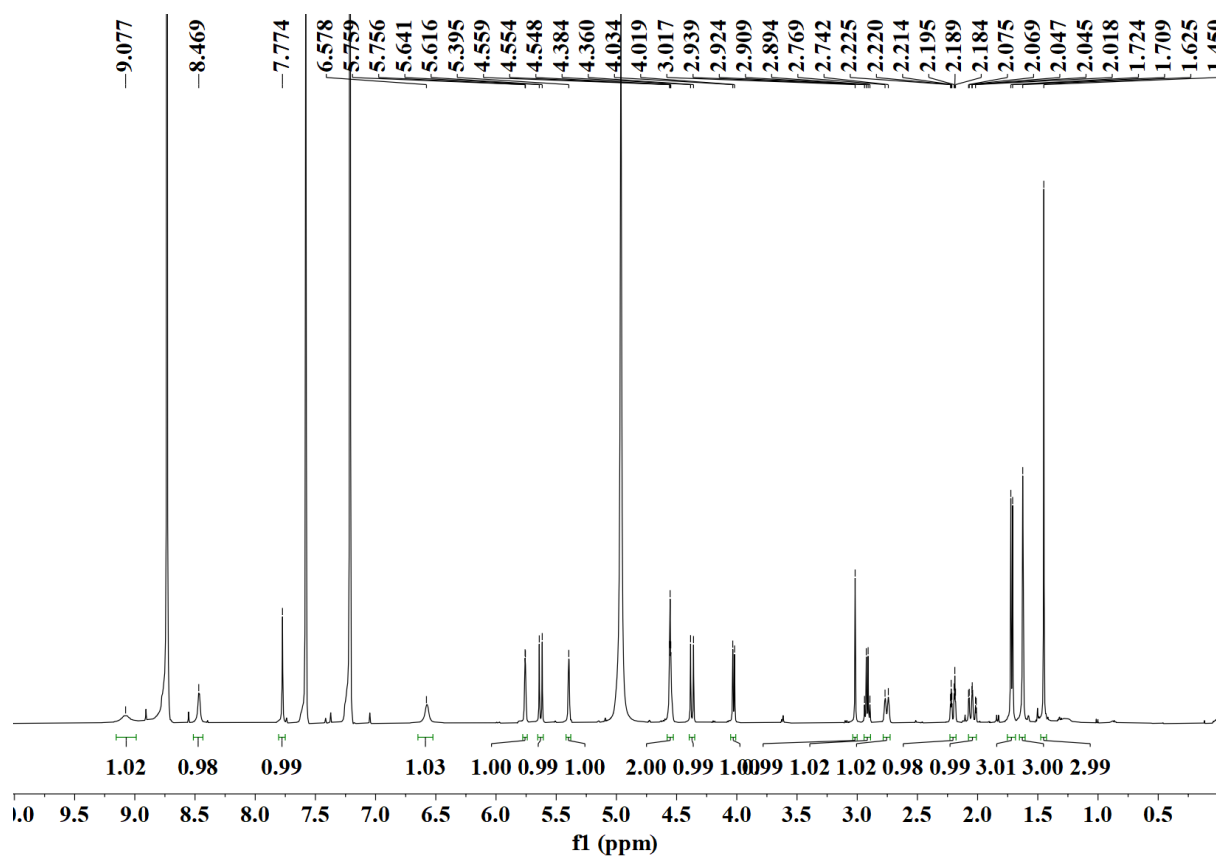

Figure S94. <sup>1</sup>H NMR spectrum of compound 9

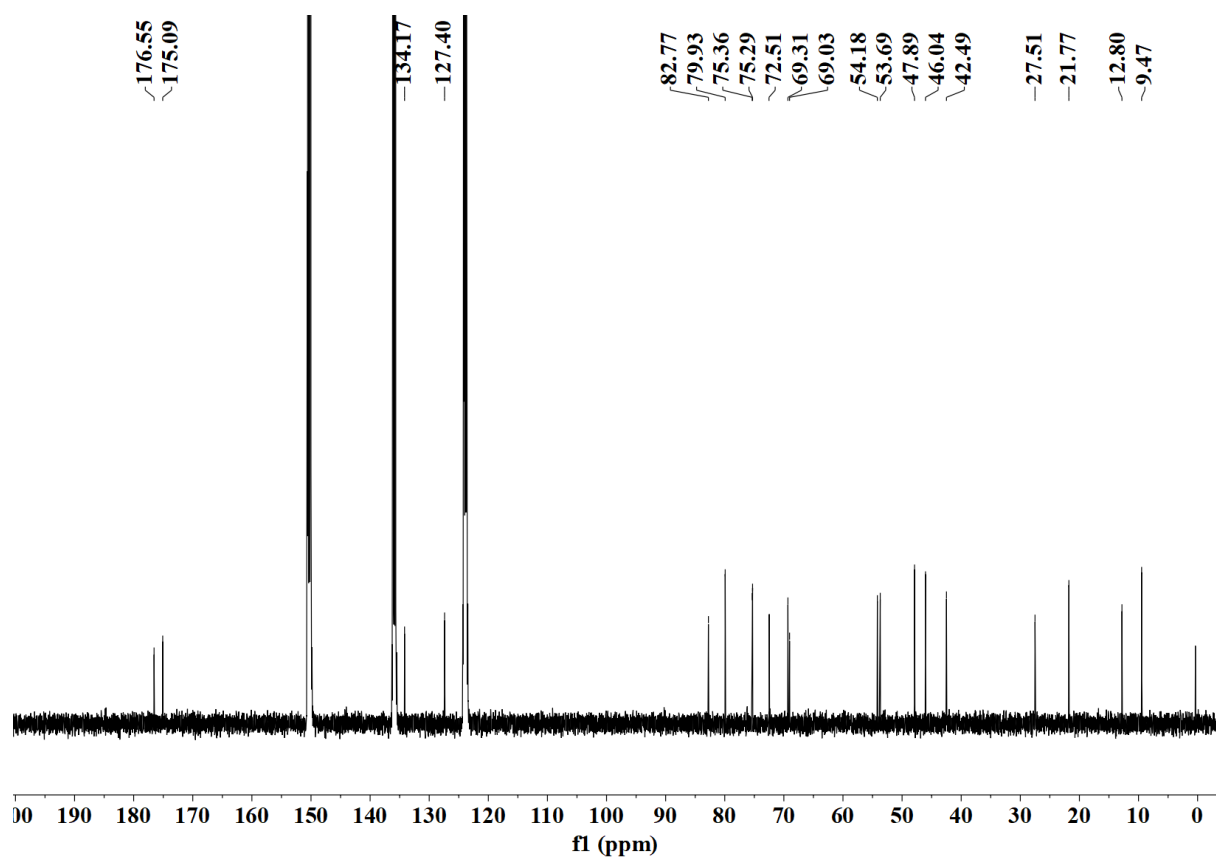

Figure S95.  $^{13}\text{C}$  NMR spectrum of compound 9

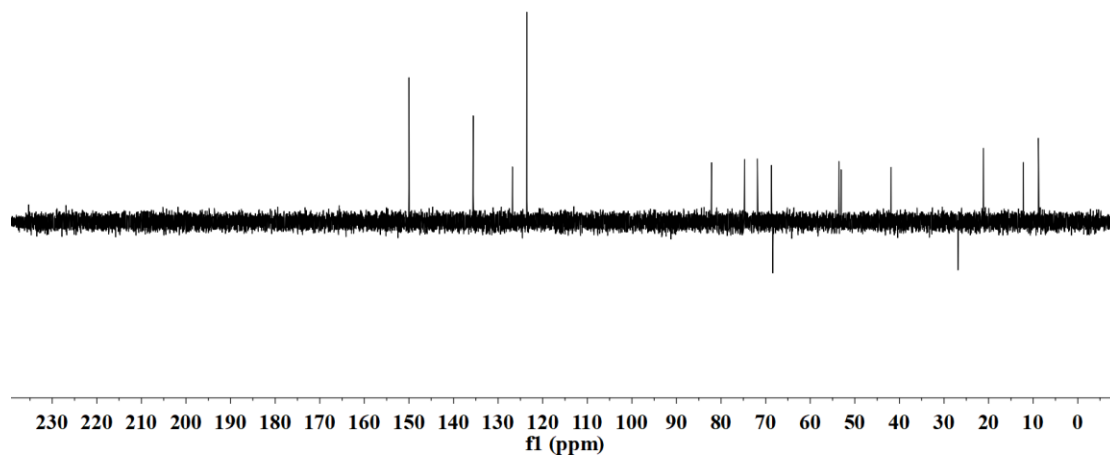

Figure S96. DEPT-135 spectrum of compound 9

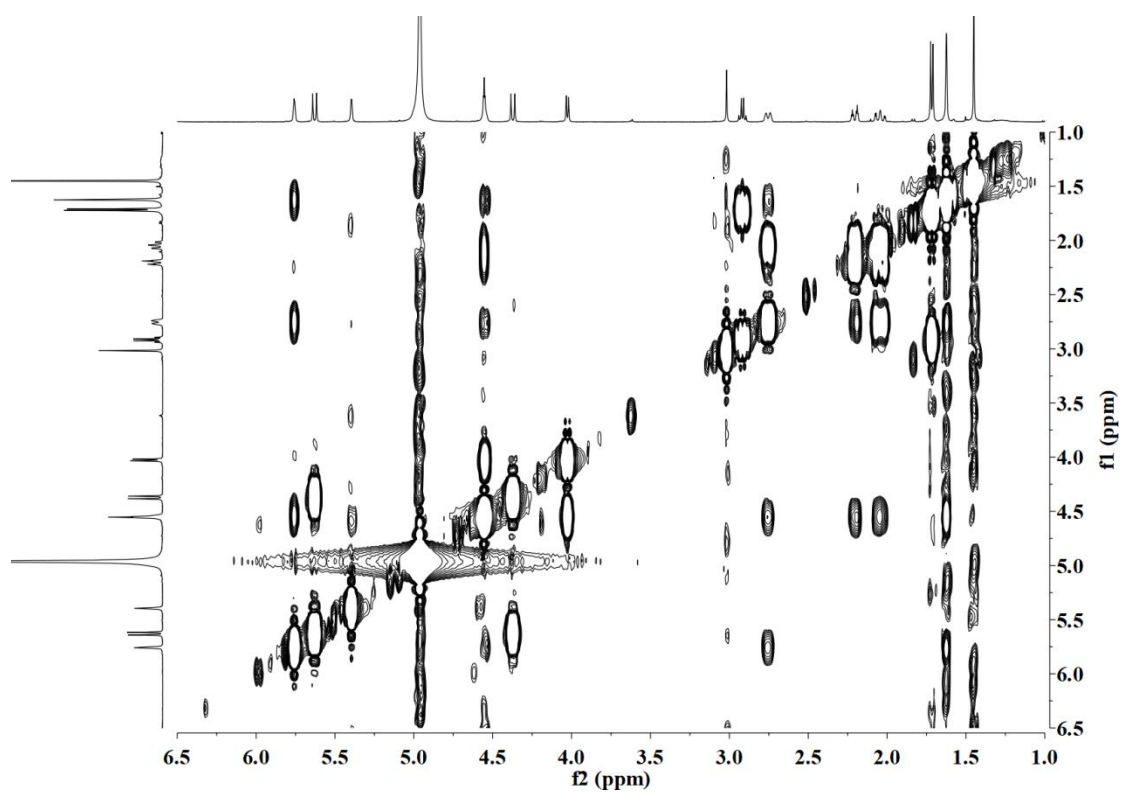

Figure S97.  $^1\text{H}$ - $^1\text{H}$  COSY spectrum of compound 9

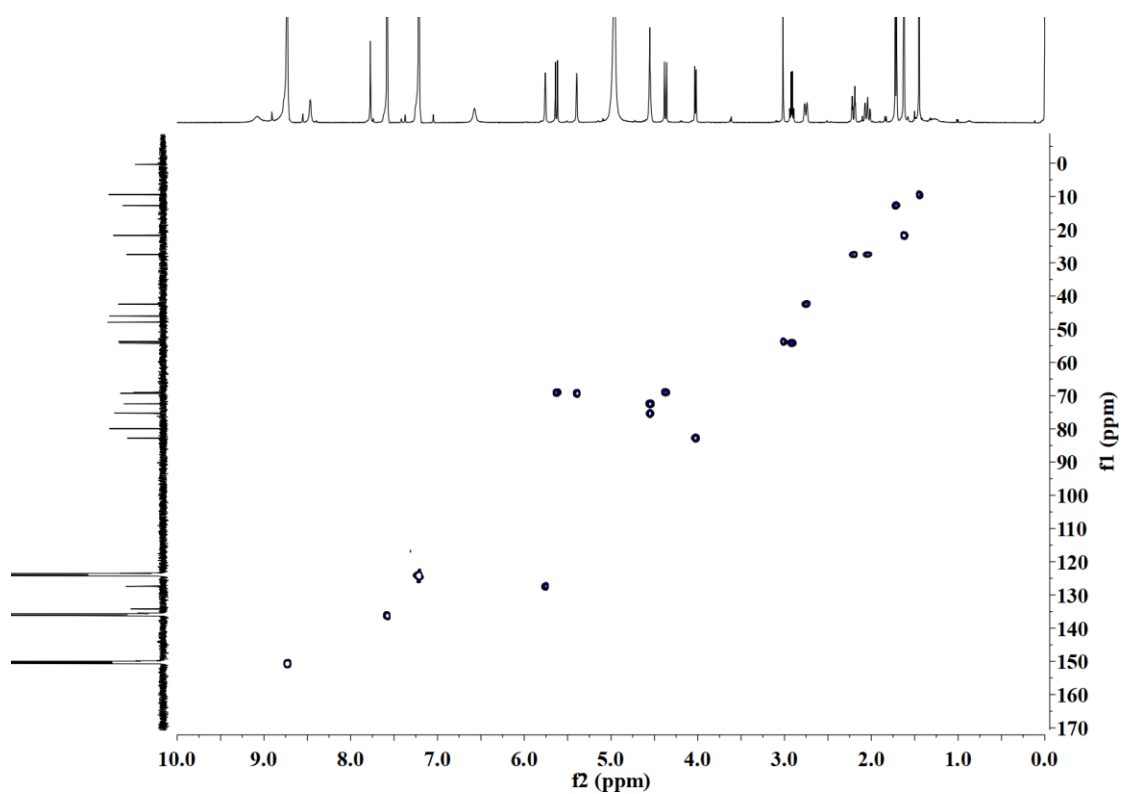

Figure S98. HSQC spectrum of compound 9

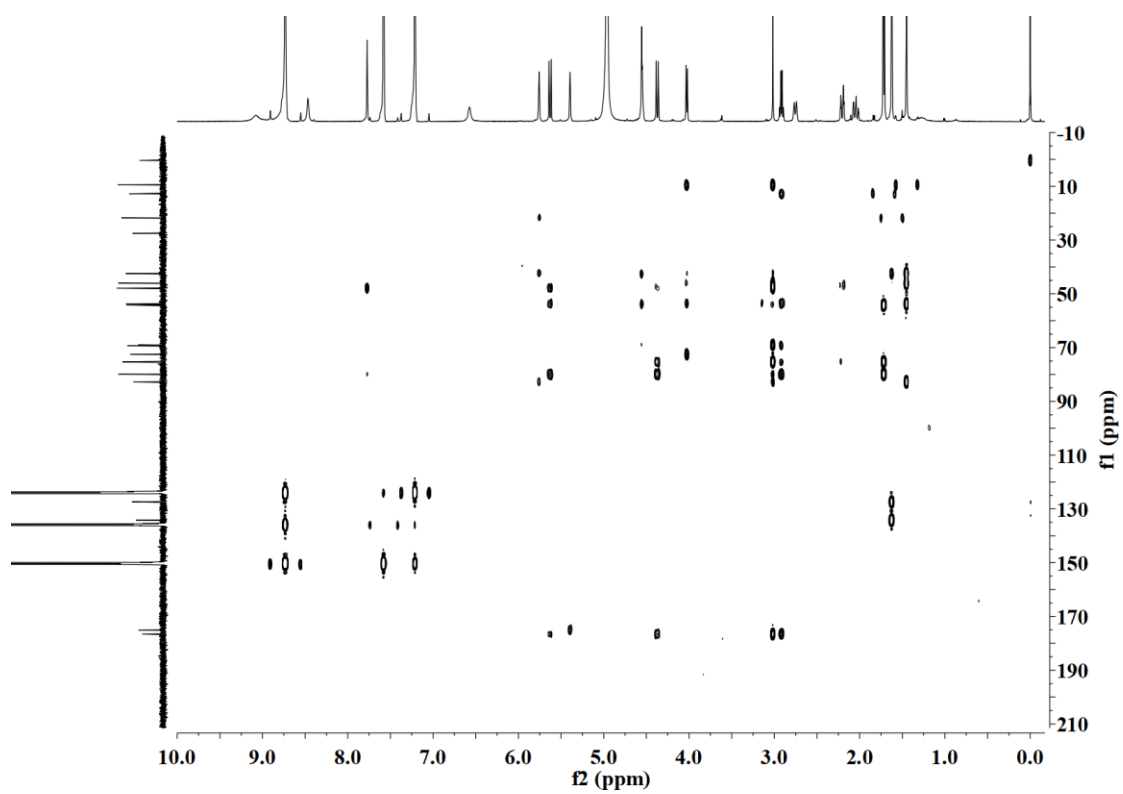

Figure S99. HMBC spectrum of compound 9

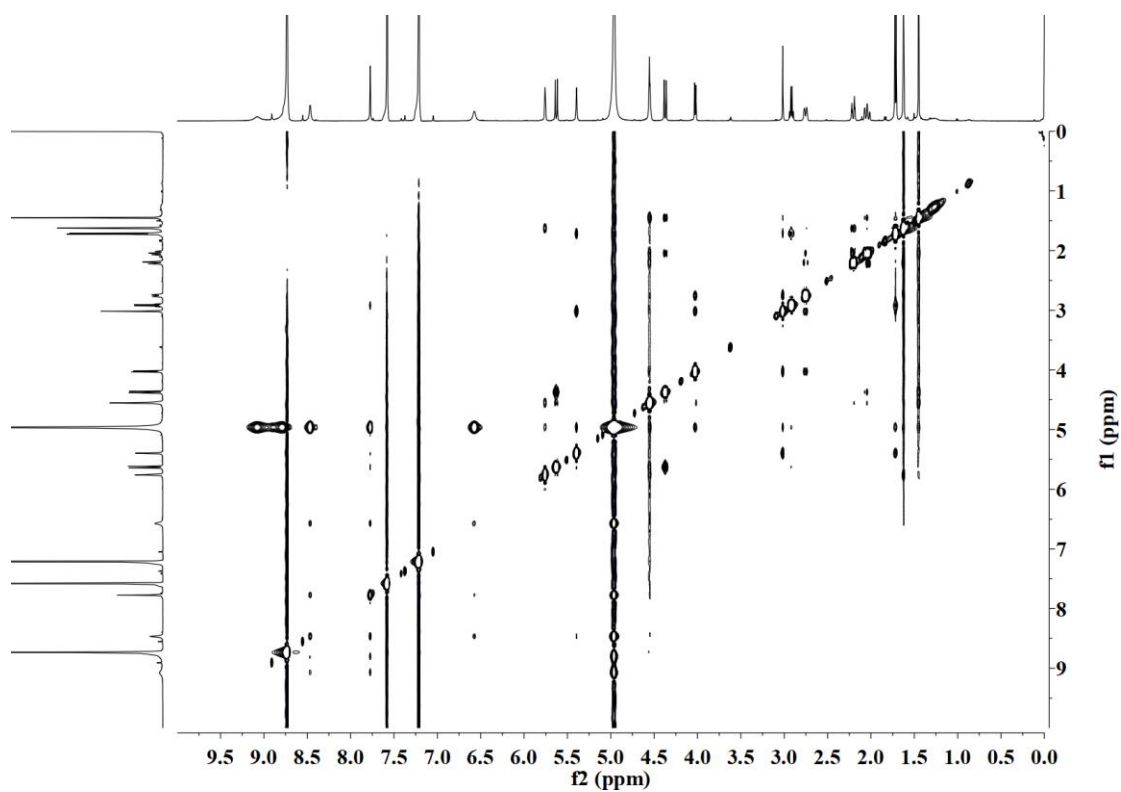

**Figure S100.** NOESY spectrum of compound **9**

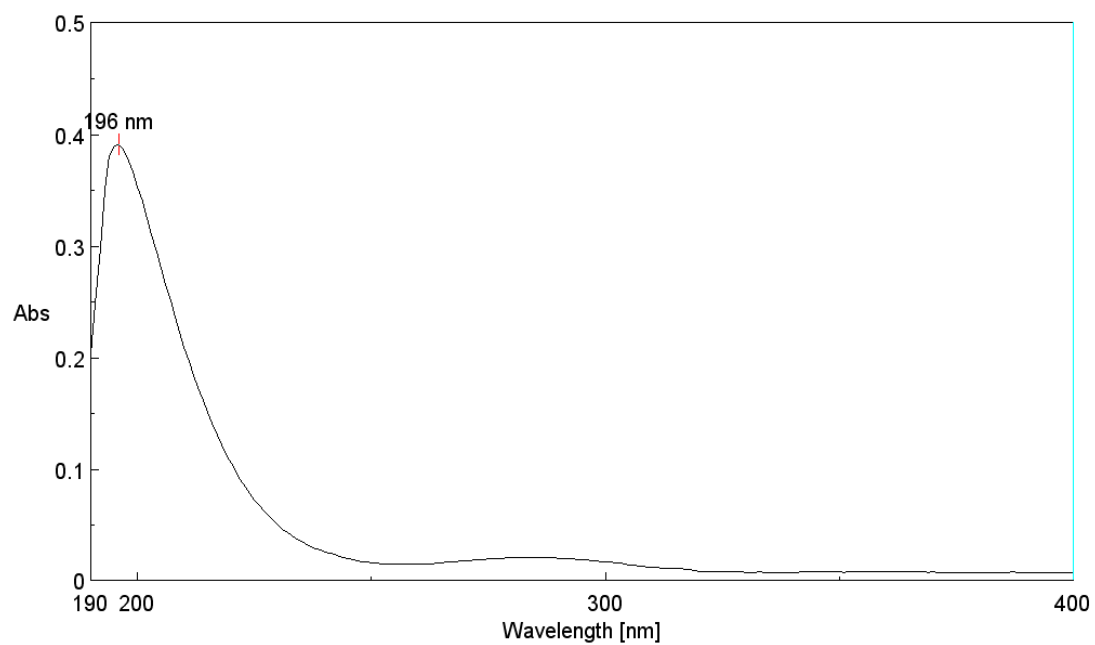

**Figure S101.** UV spectrum of compound **10**

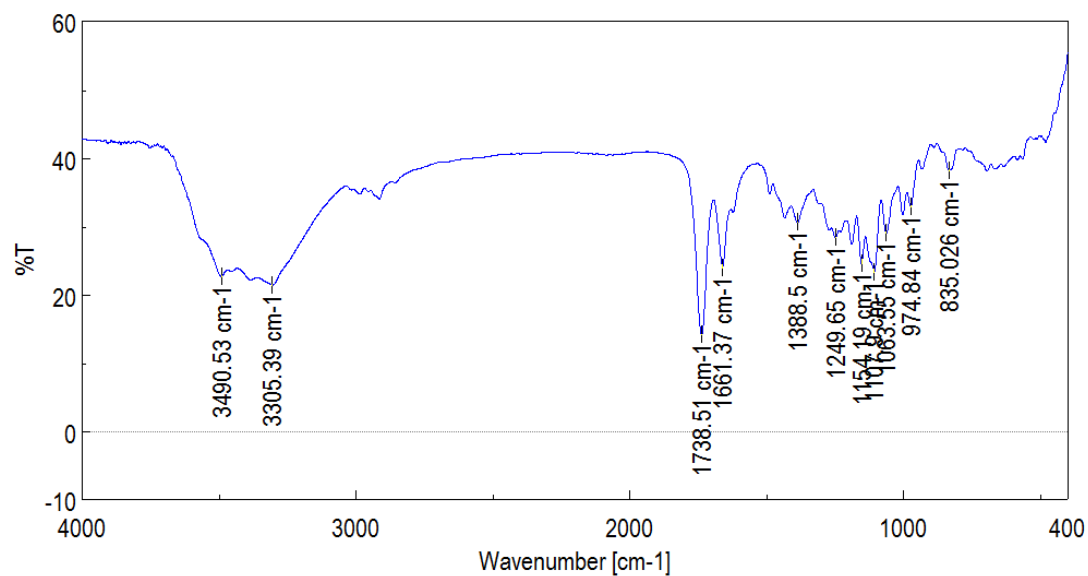

Figure S102. IR (KBr disc) spectrum of compound 10

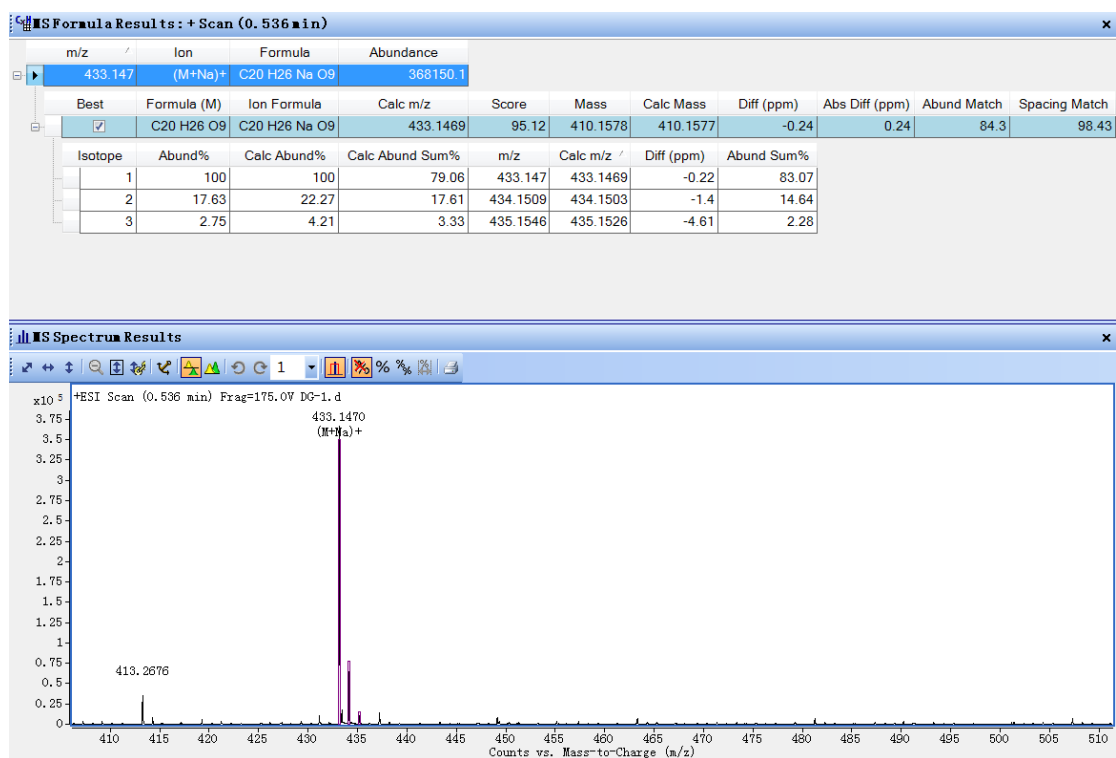

Figure S103. HR-ESI-MS spectrum of compound 10

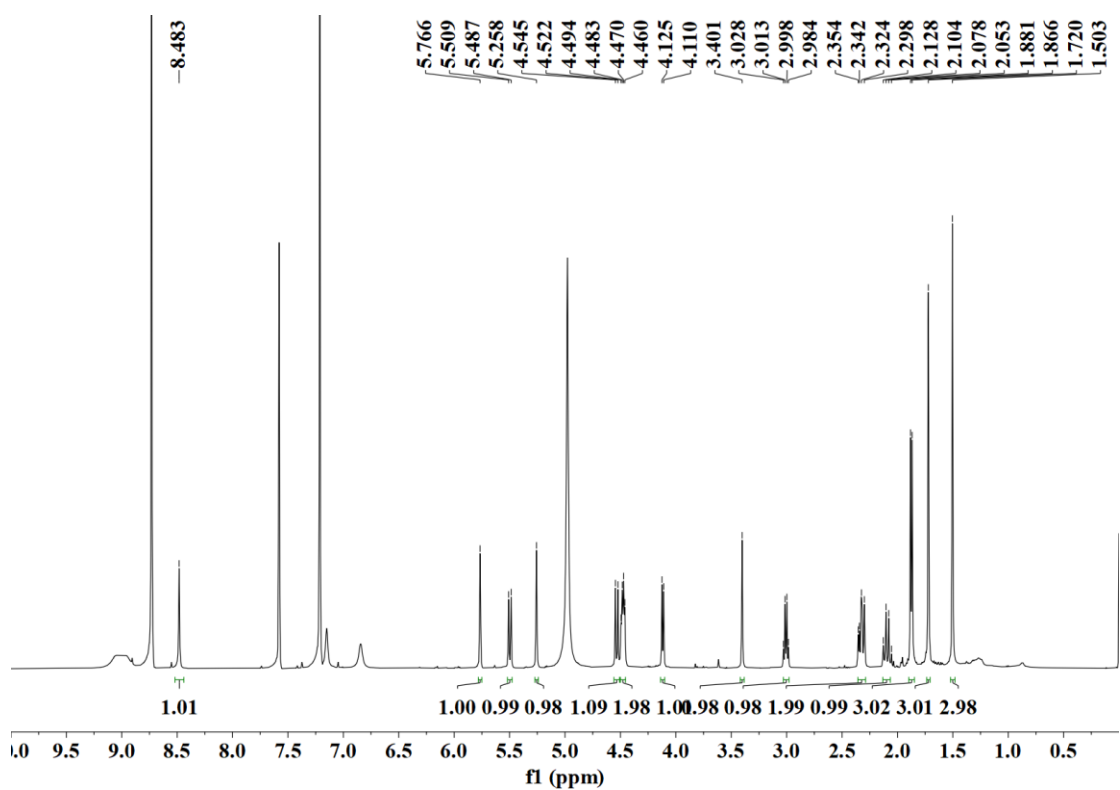

Figure S104.  $^1\text{H}$  NMR spectrum of compound 10

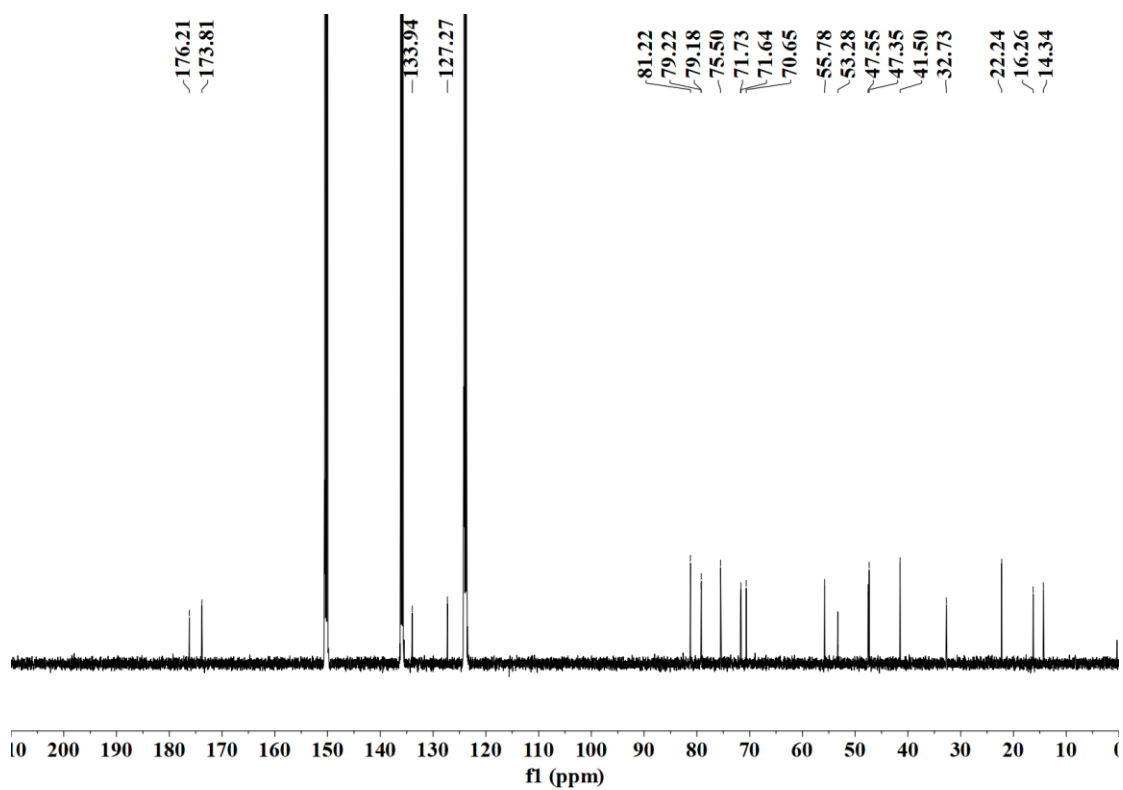

Figure S105.  $^{13}\text{C}$  NMR spectrum of compound 10



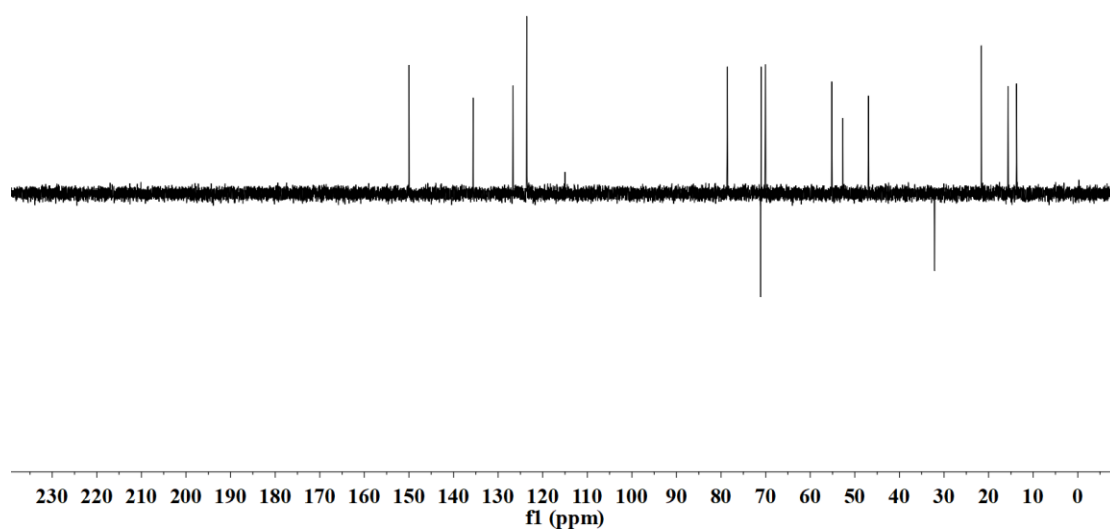

**Figure S106.** DEPT-135 spectrum of compound **10**

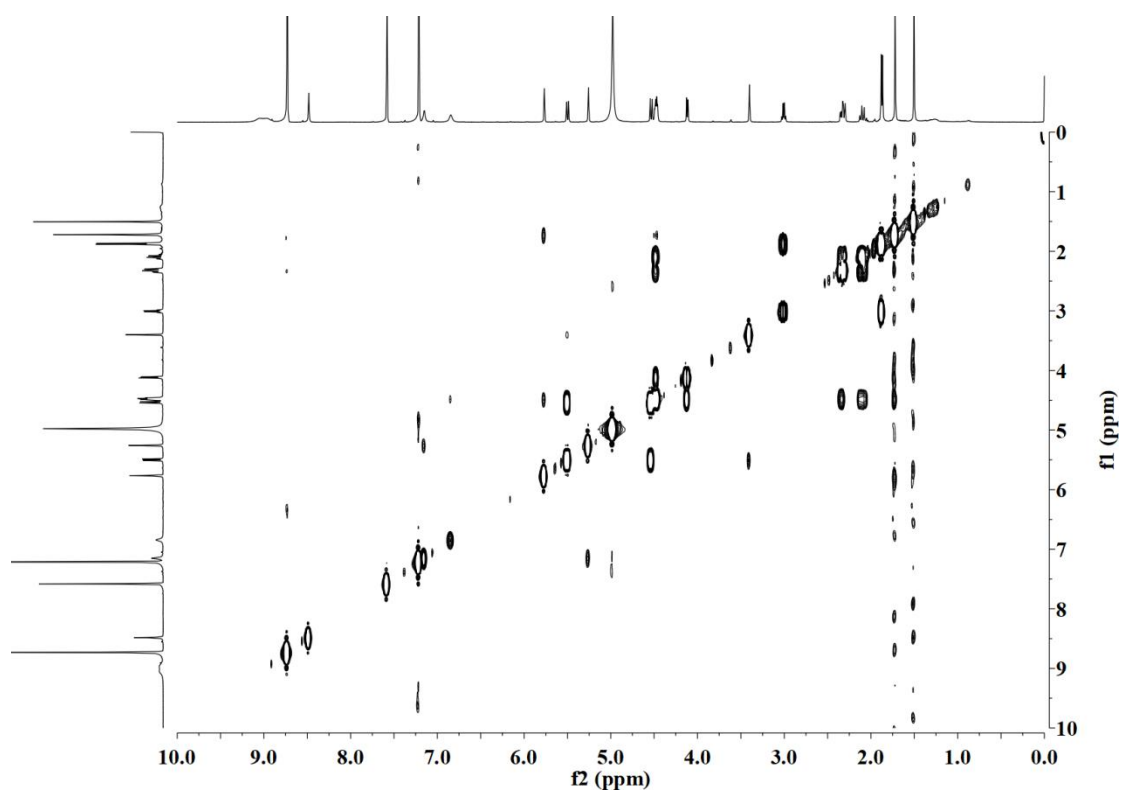

**Figure S107.**  $^1\text{H}$ - $^1\text{H}$  COSY spectrum of compound **10**

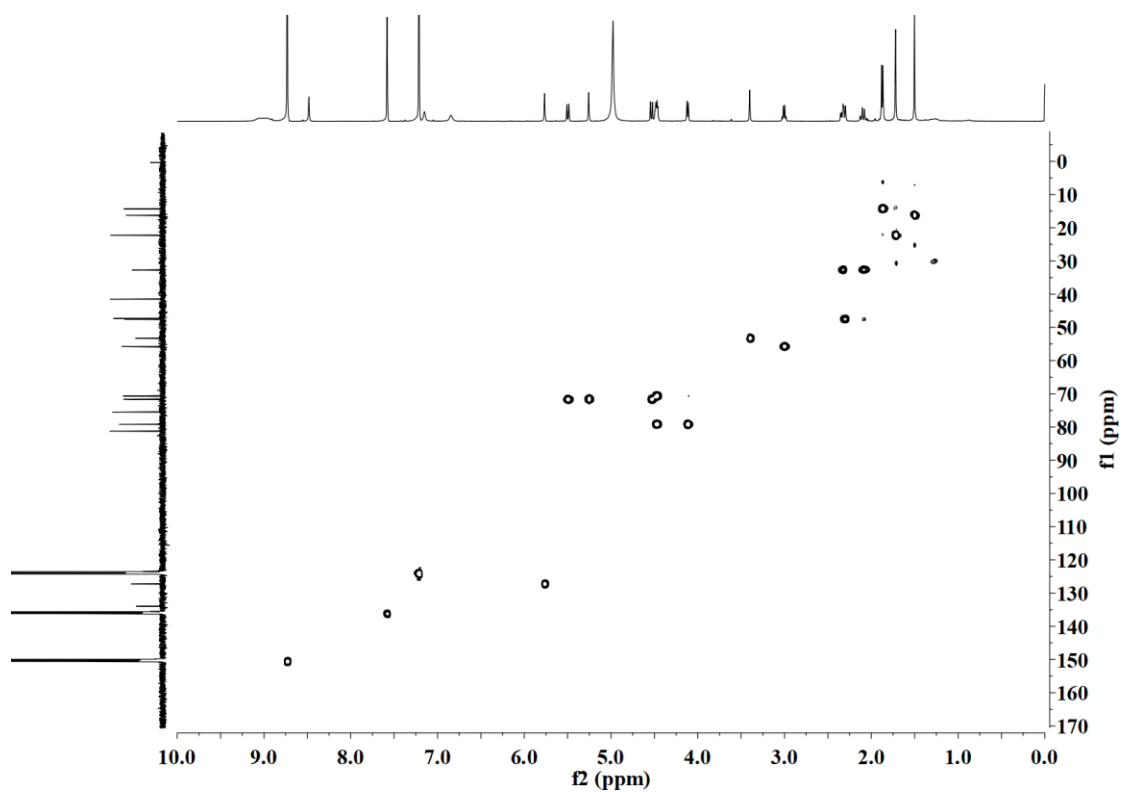

Figure S108. HSQC spectrum of compound 10

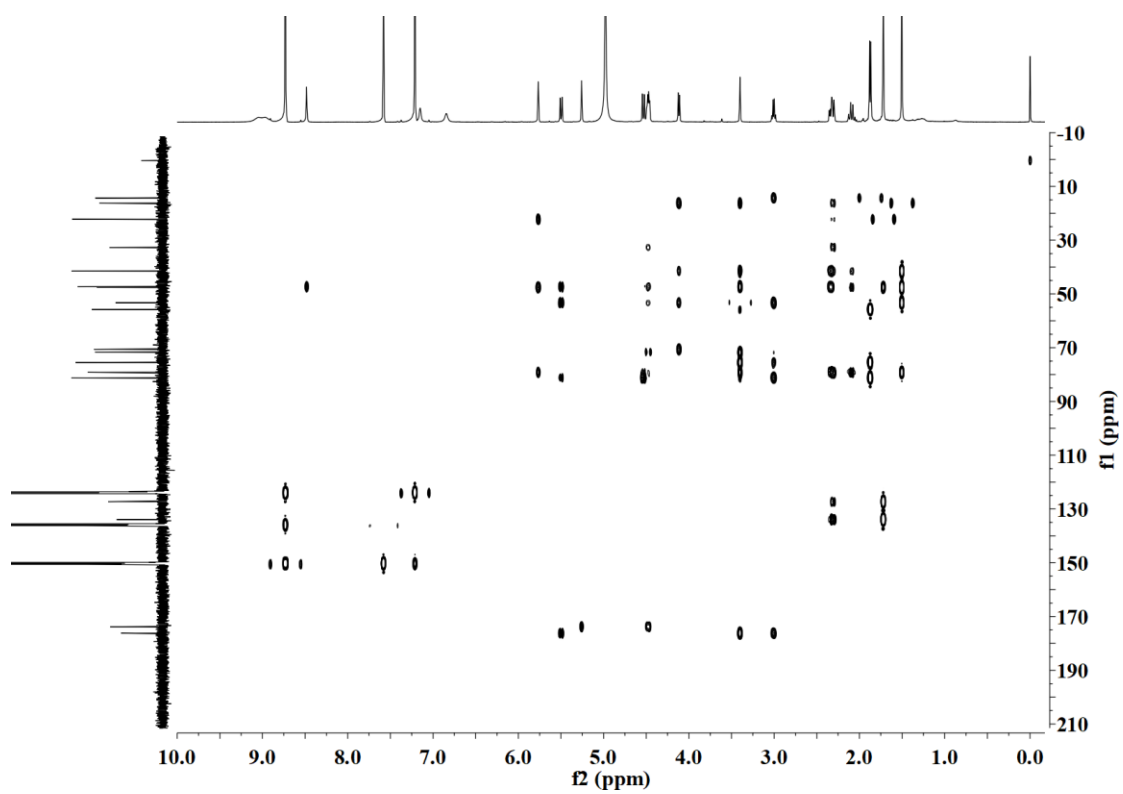

Figure S109. HMBC spectrum of compound 10

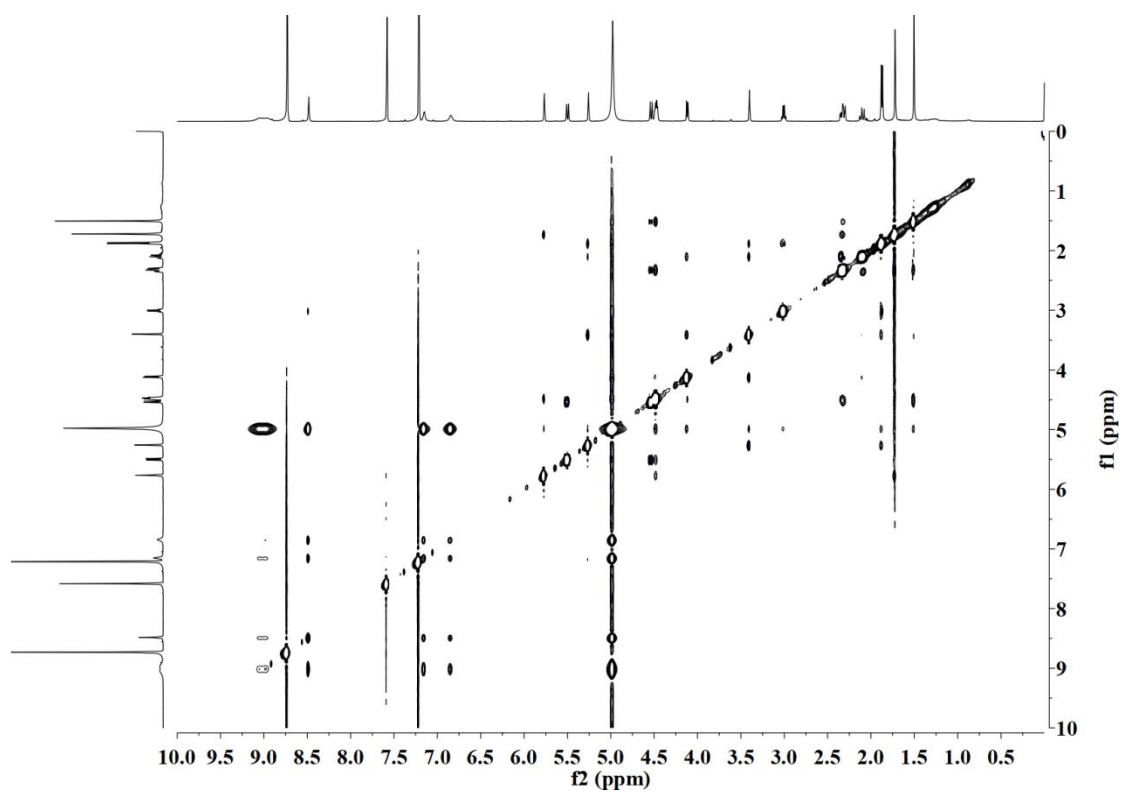

**Figure S110.** NOESY spectrum of compound 10

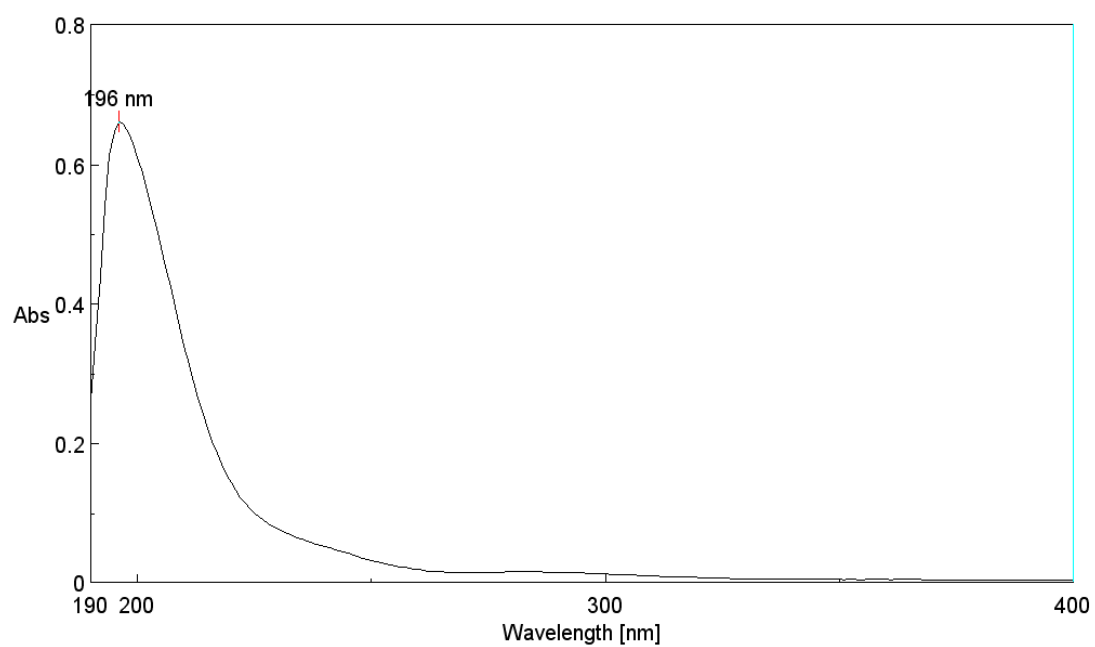

**Figure S111.** UV spectrum of compound 11

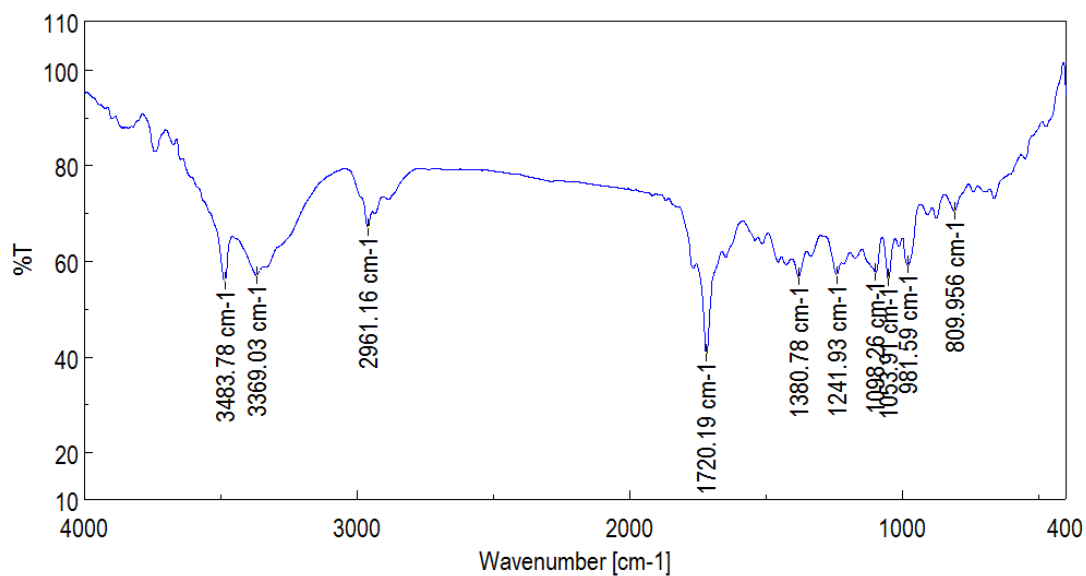

**Figure S112.** IR (KBr disc) spectrum of compound 11

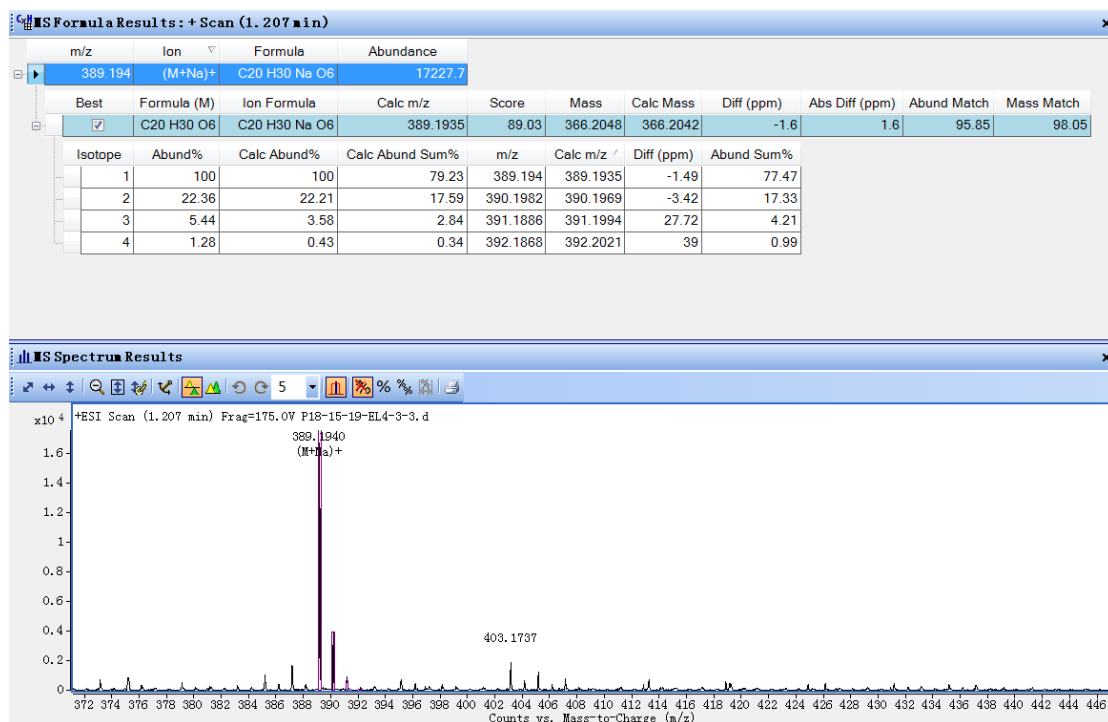

**Figure S113.** HR-ESI-MS spectrum of compound 11

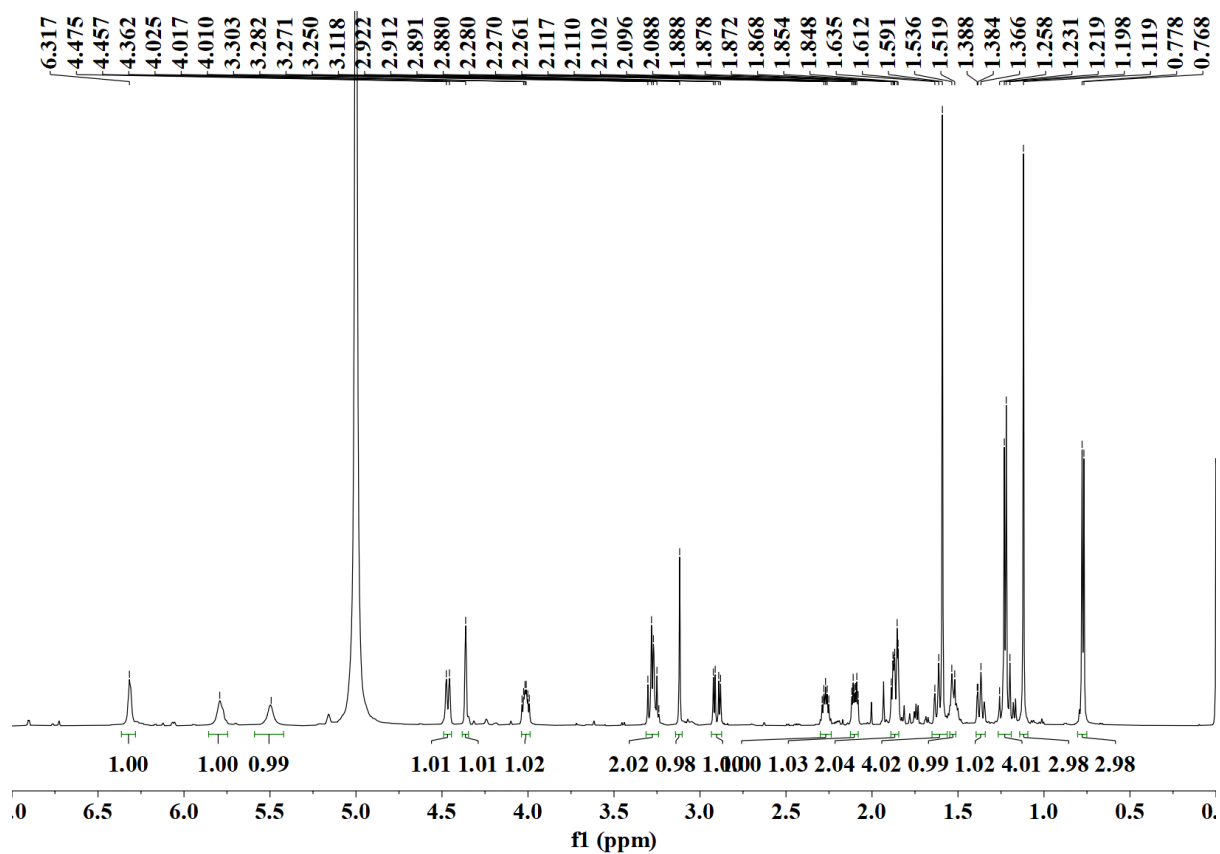

Figure S114. <sup>1</sup>H NMR spectrum of compound 11

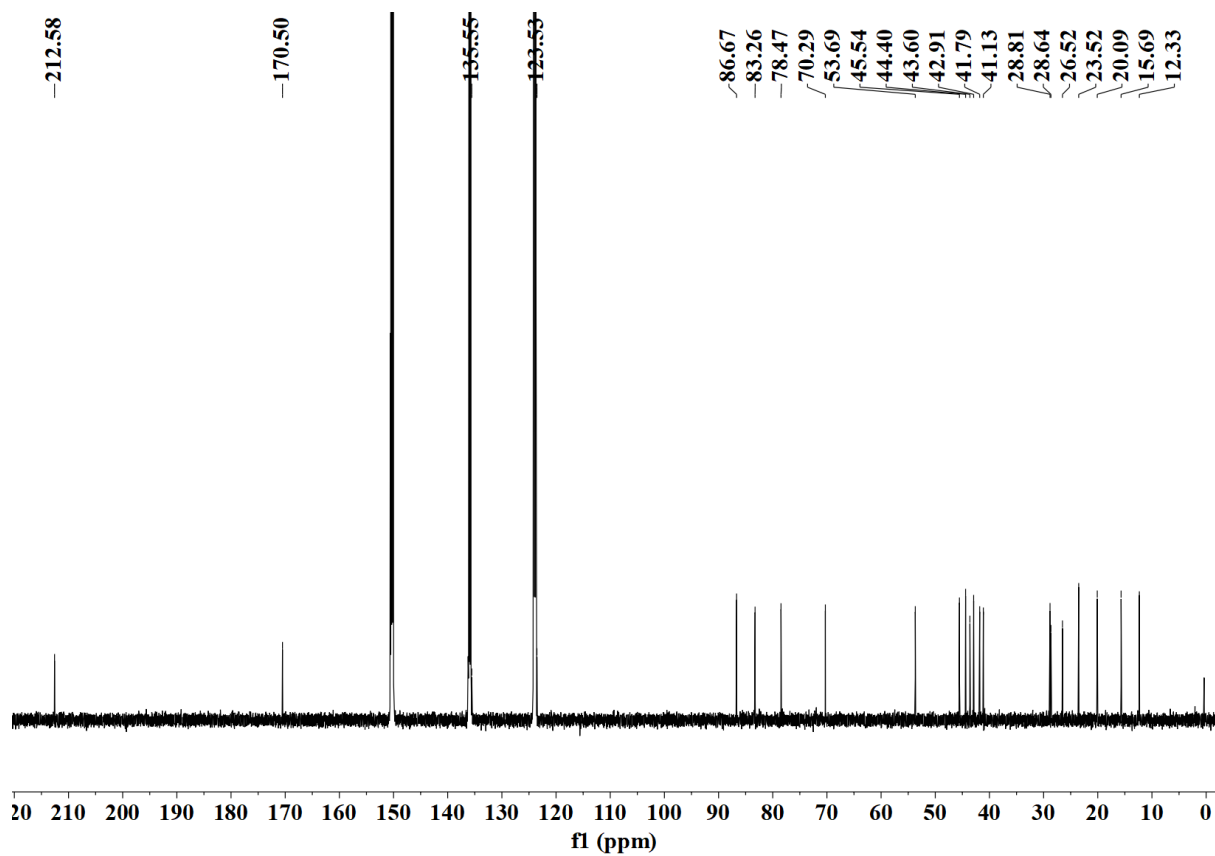

**Figure S115.**  $^{13}\text{C}$  NMR spectrum of compound **11**

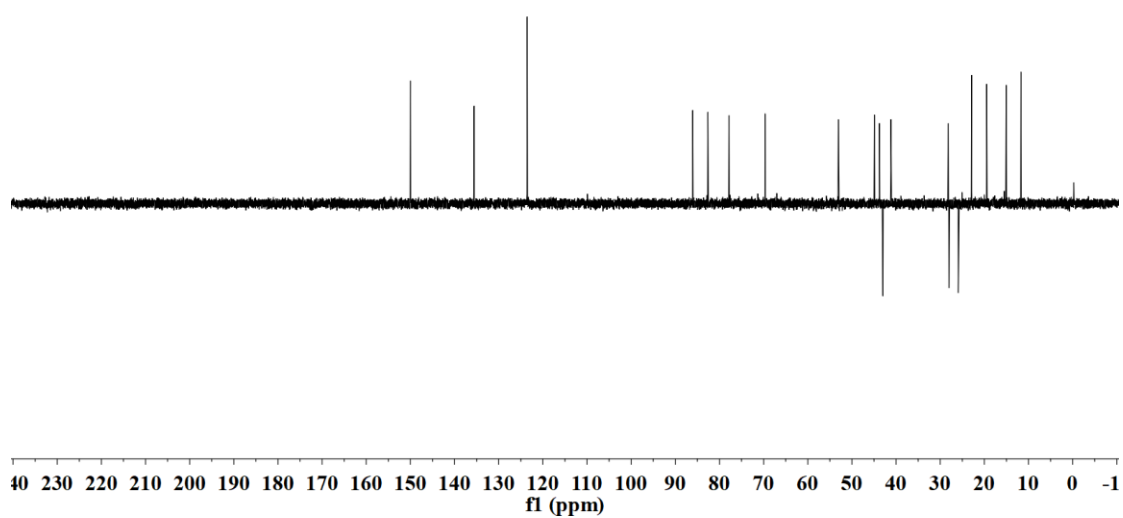

**Figure S116.** DEPT-135 spectrum of compound **11**

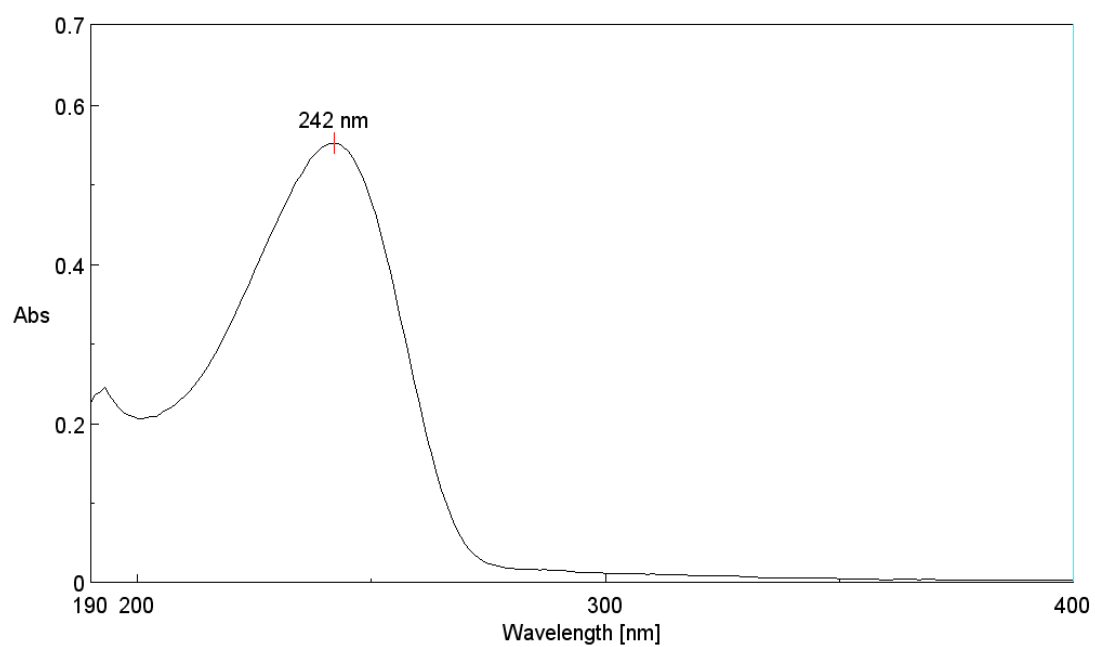

**Figure S117.** UV spectrum of compound **12**

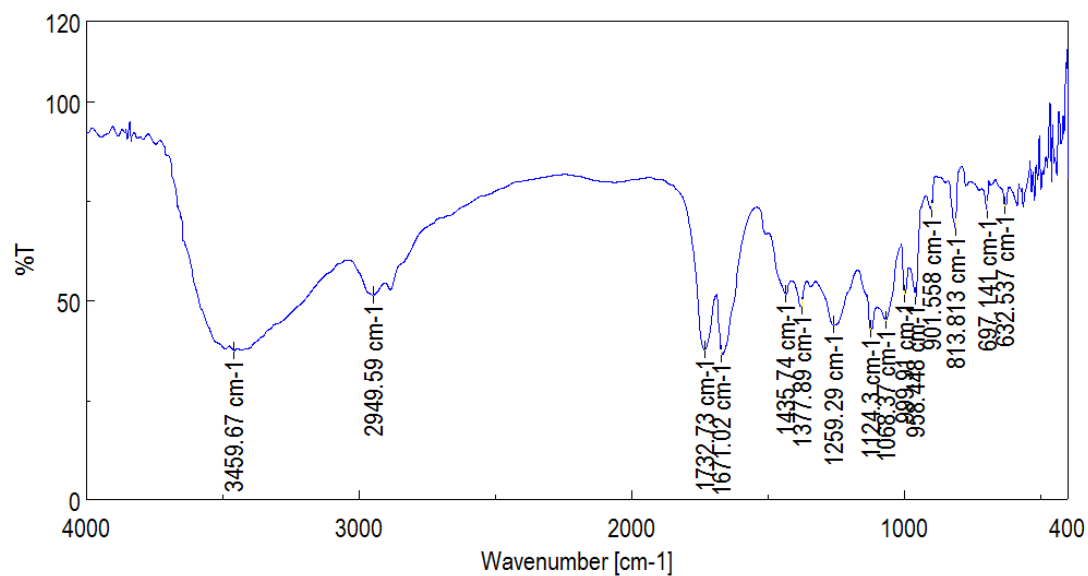

Figure S118. IR (KBr disc) spectrum of compound 12

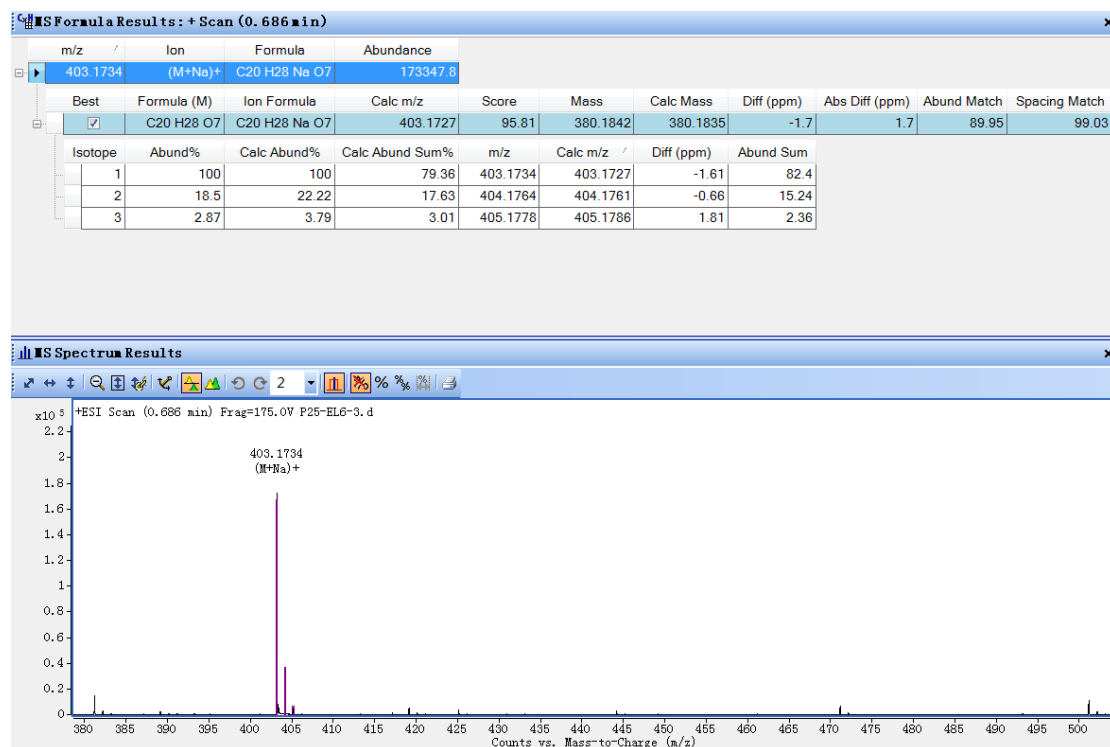

Figure S119. HR-ESI-MS spectrum of compound 12

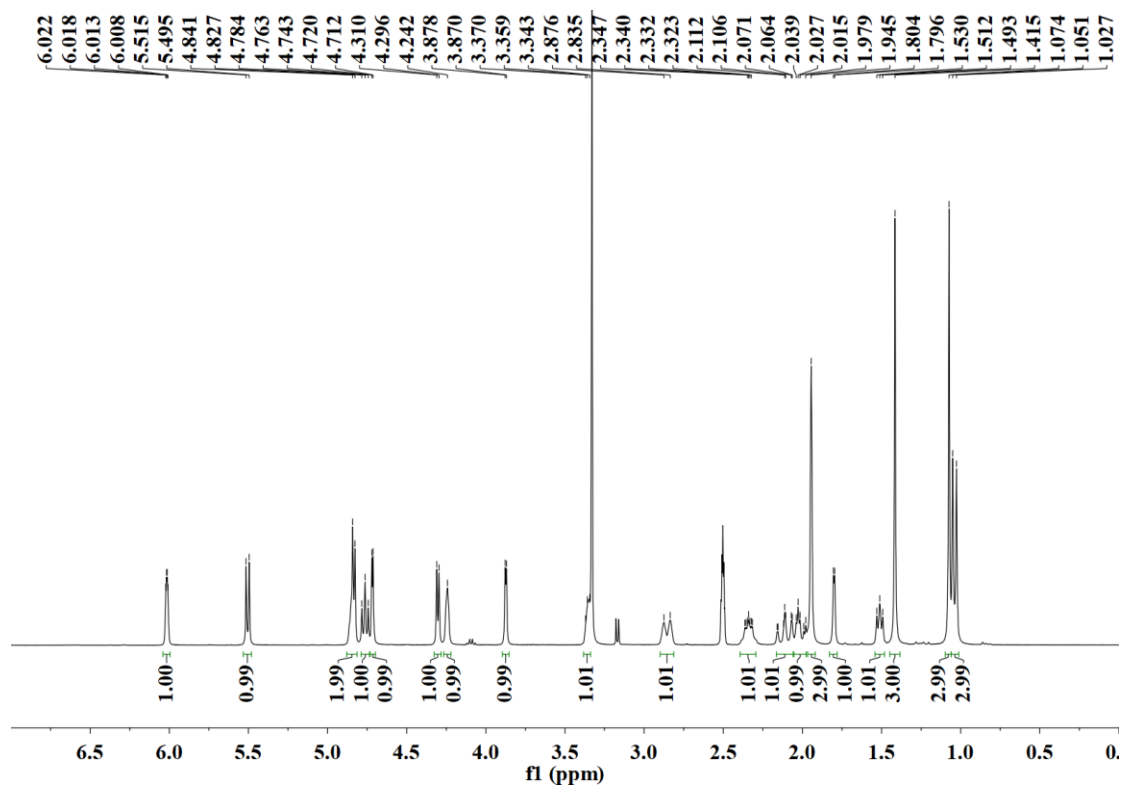

Figure S120.  $^1\text{H}$  NMR spectrum of compound 12

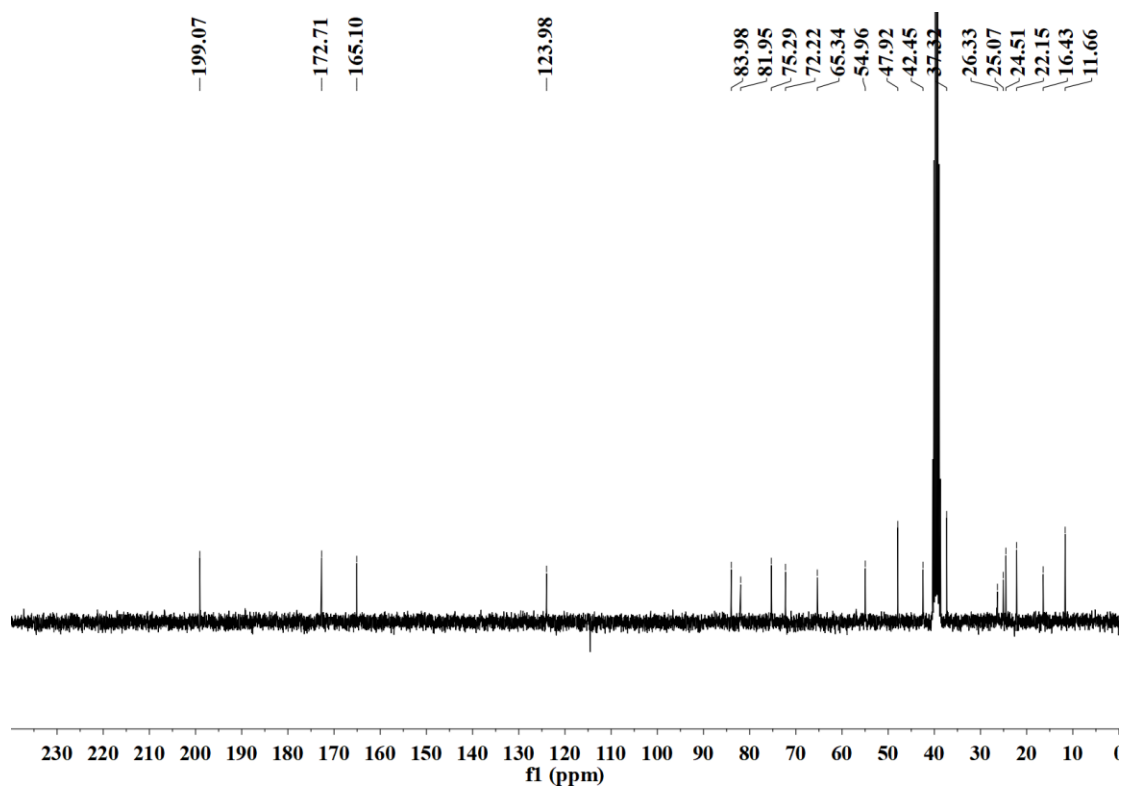

Figure S121.  $^{13}\text{C}$  NMR spectrum of compound 12



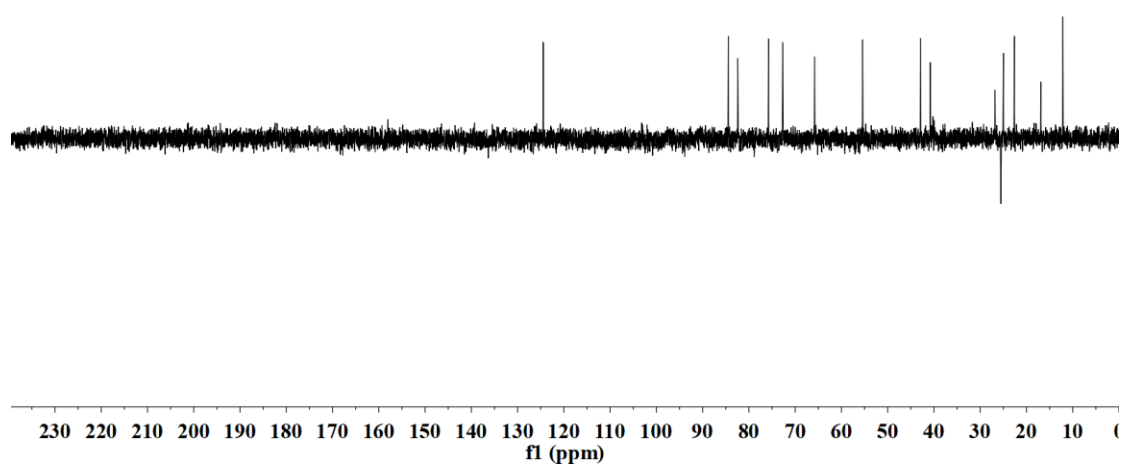

**Figure S122.** DEPT-135 spectrum of compound **12**

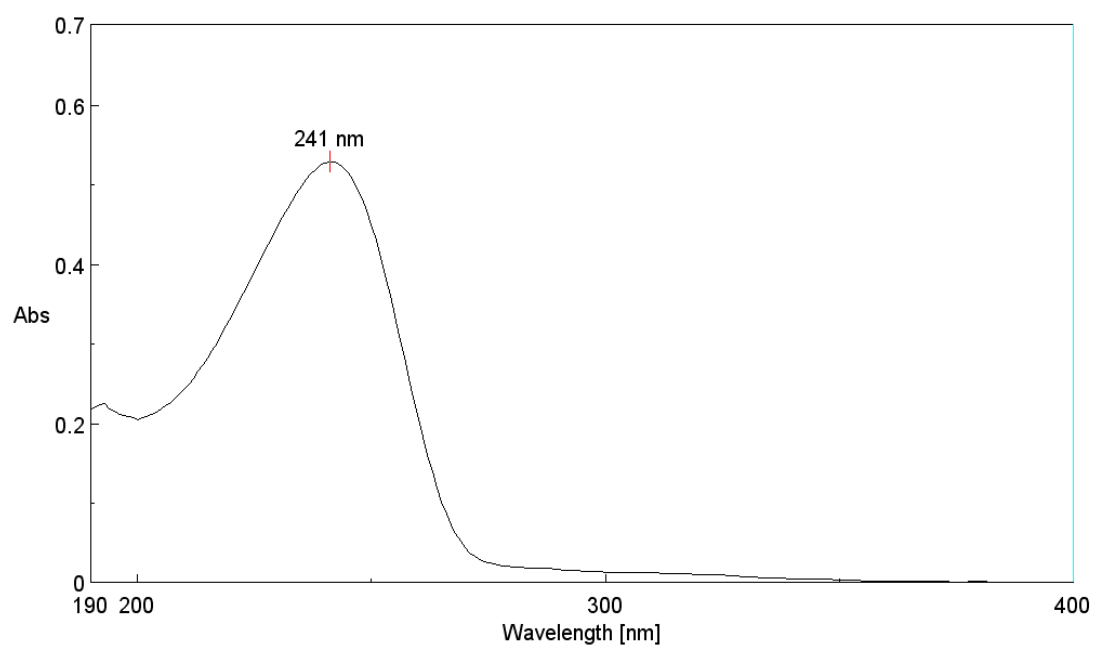

**Figure S123.** UV spectrum of compound **13**

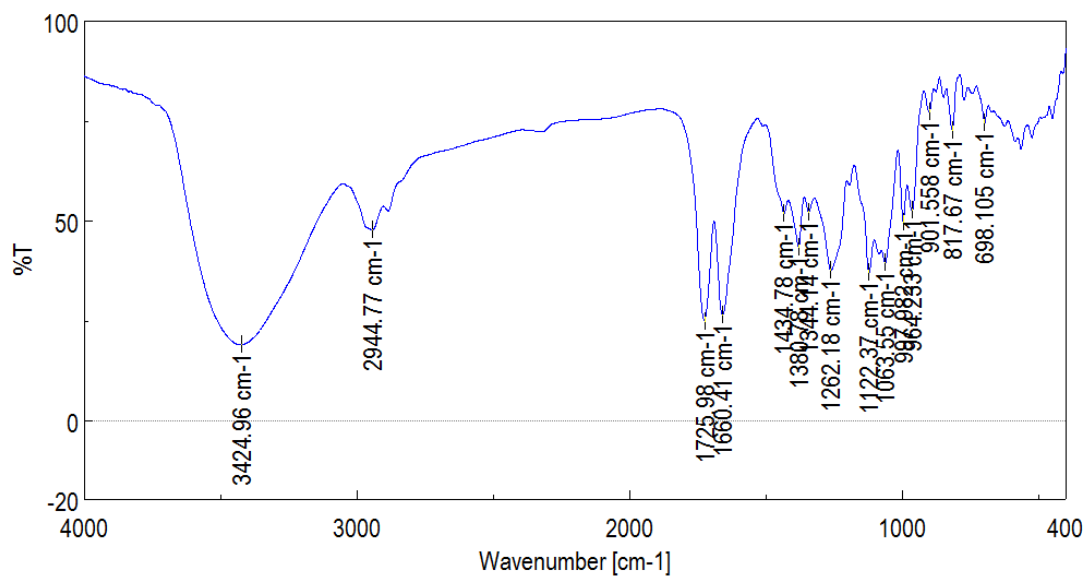

Figure S124. IR (KBr disc) spectrum of compound 13

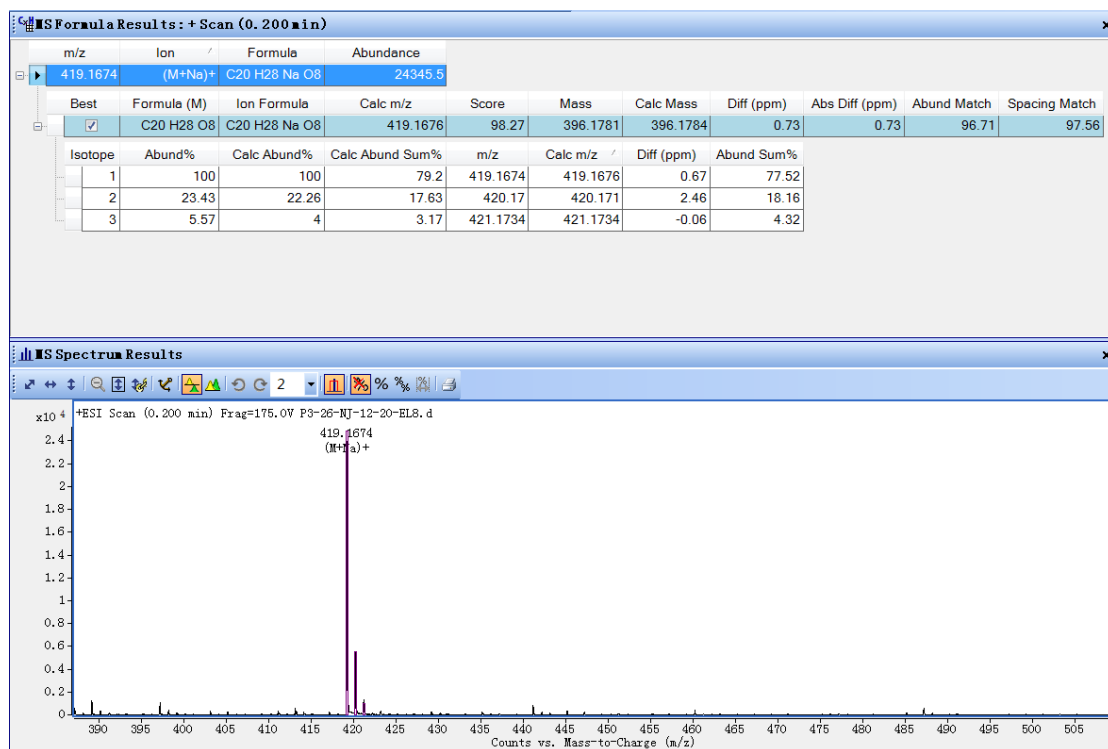

Figure S125. HR-ESI-MS spectrum of compound 13

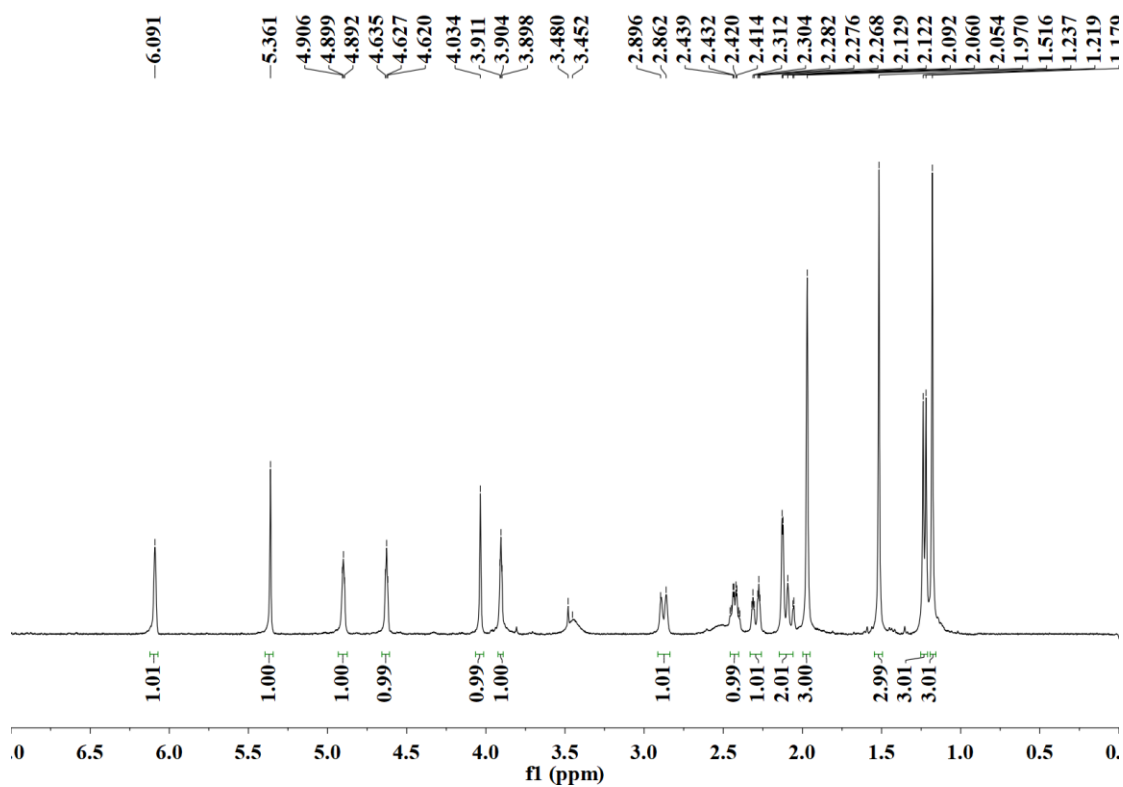

Figure S126. <sup>1</sup>H NMR spectrum of compound 13

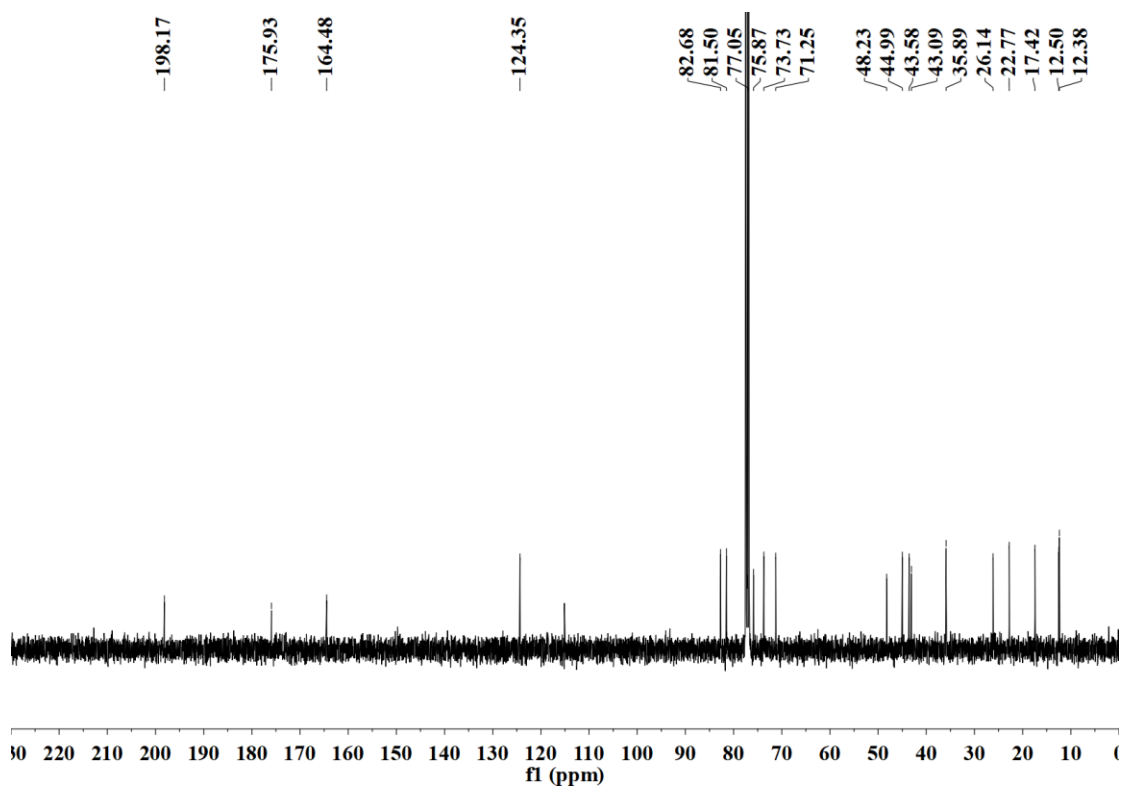

Figure S127. <sup>13</sup>C NMR spectrum of compound 13

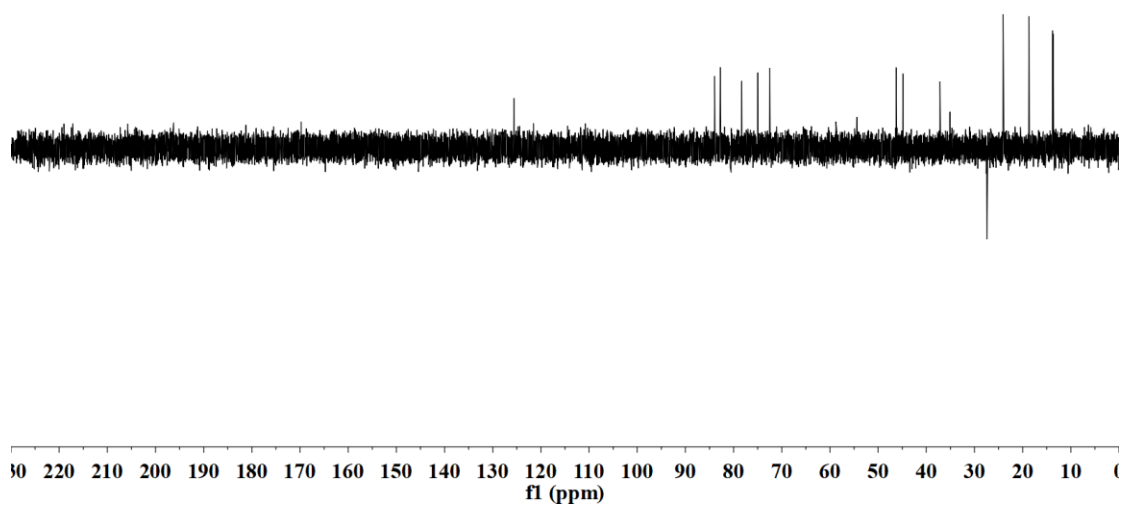

**Figure S128.** DEPT-135 spectrum of compound **13**

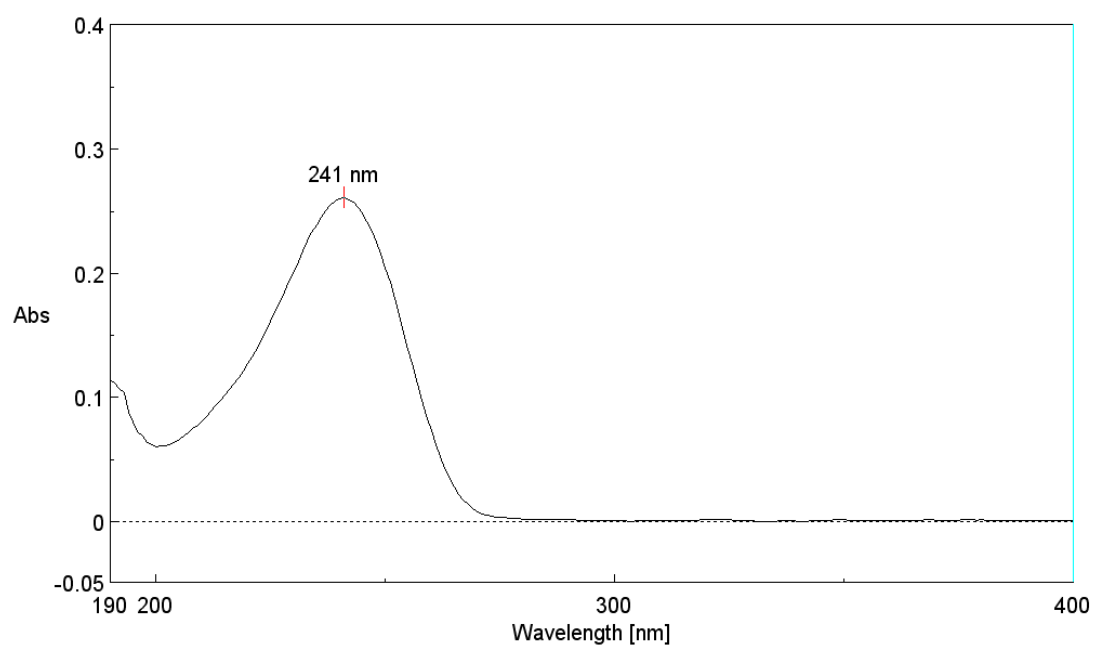

**Figure S129.** UV spectrum of compound **14**

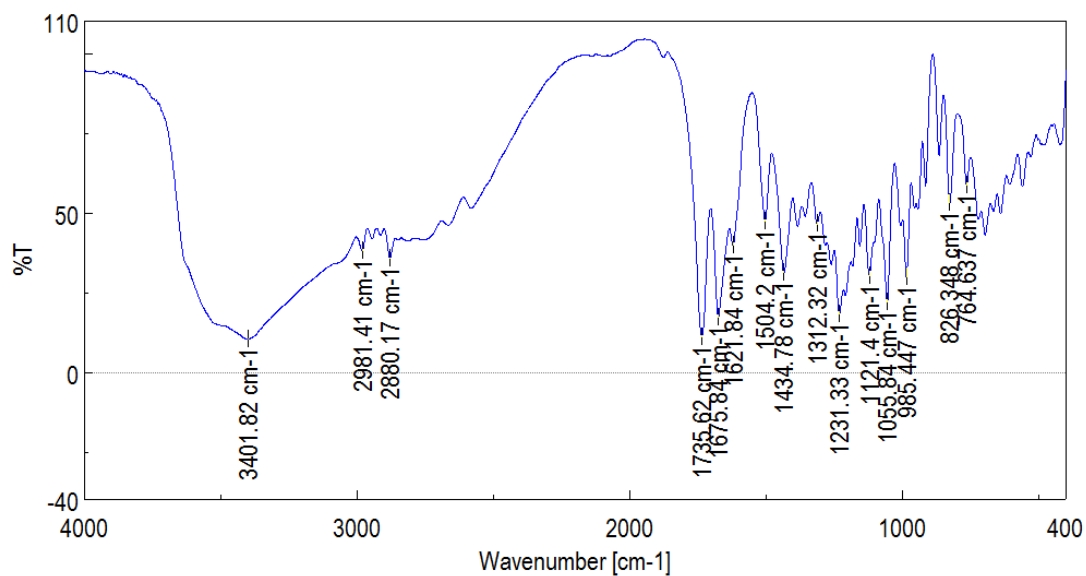

Figure S130. IR (KBr disc) spectrum of compound 14

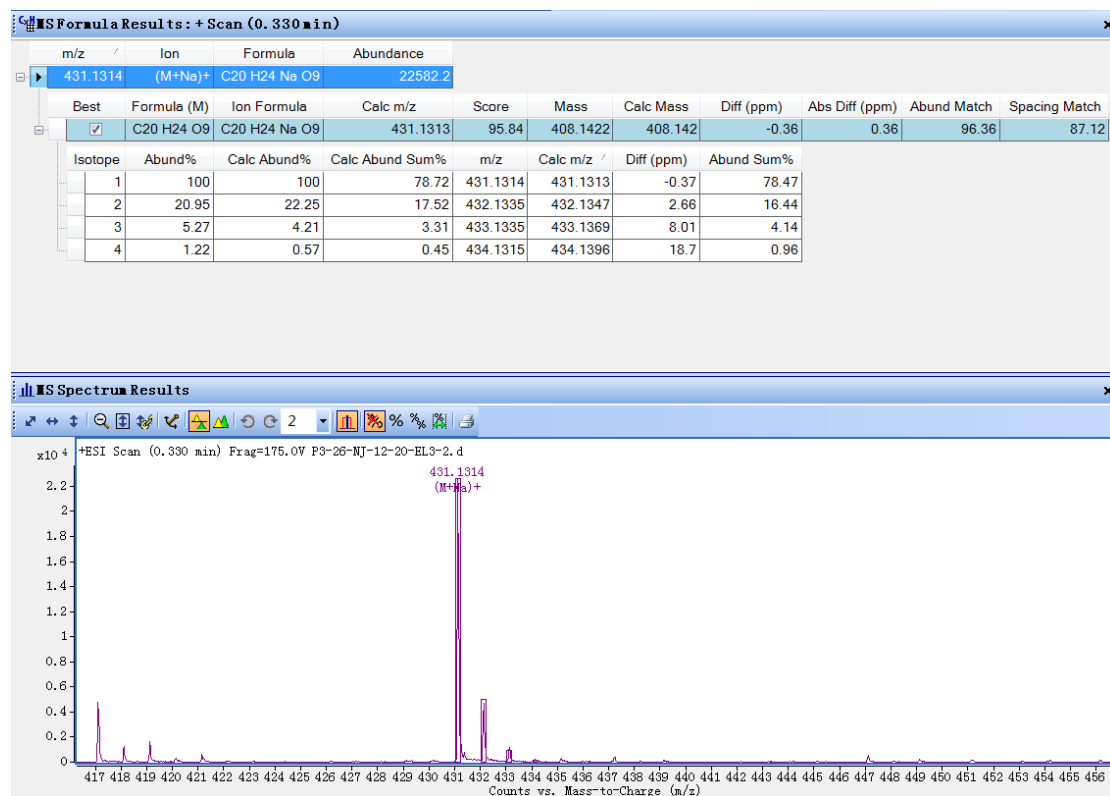

Figure S131. HR-ESI-MS spectrum of compound 14

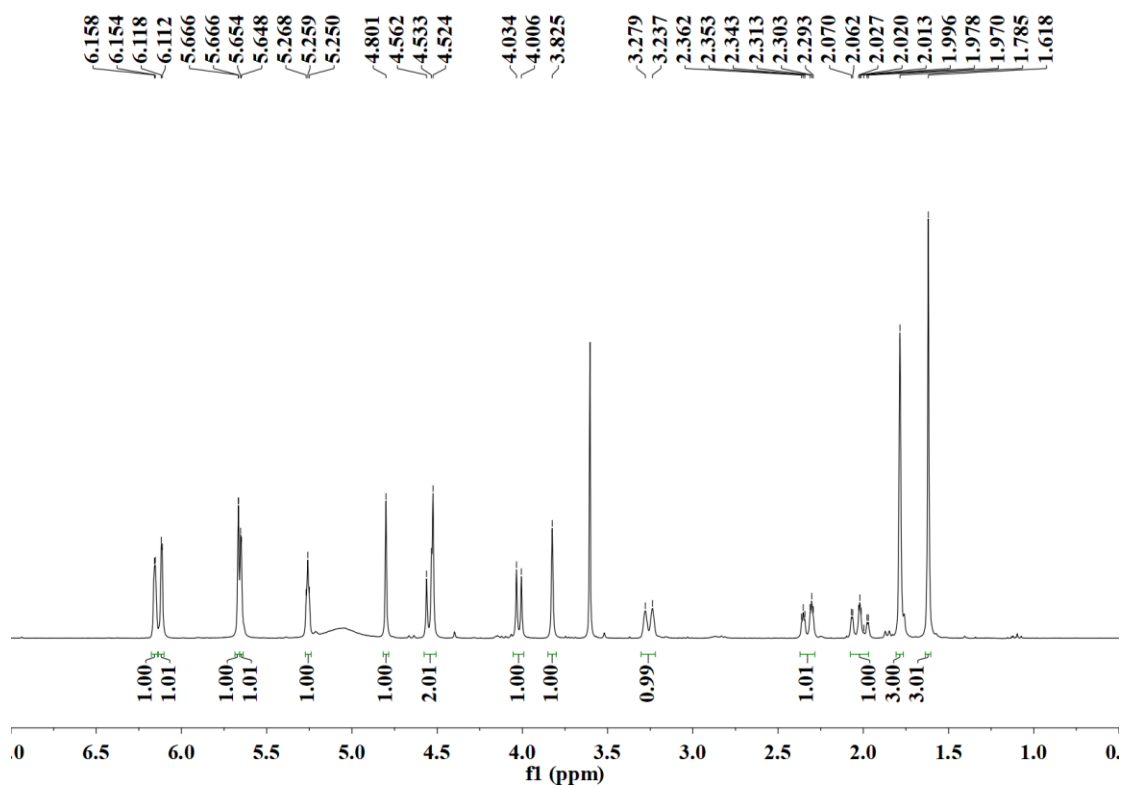

Figure S132. <sup>1</sup>H NMR spectrum of compound 14

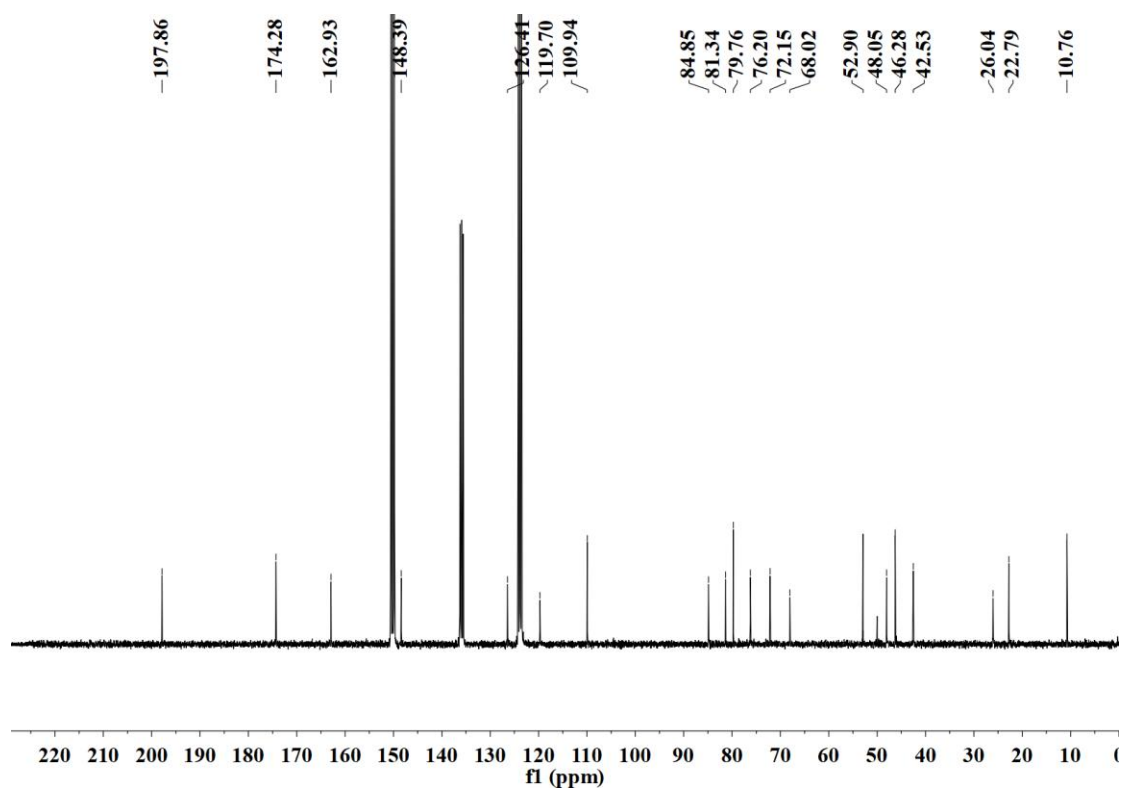

Figure S133. <sup>13</sup>C NMR spectrum of compound 14

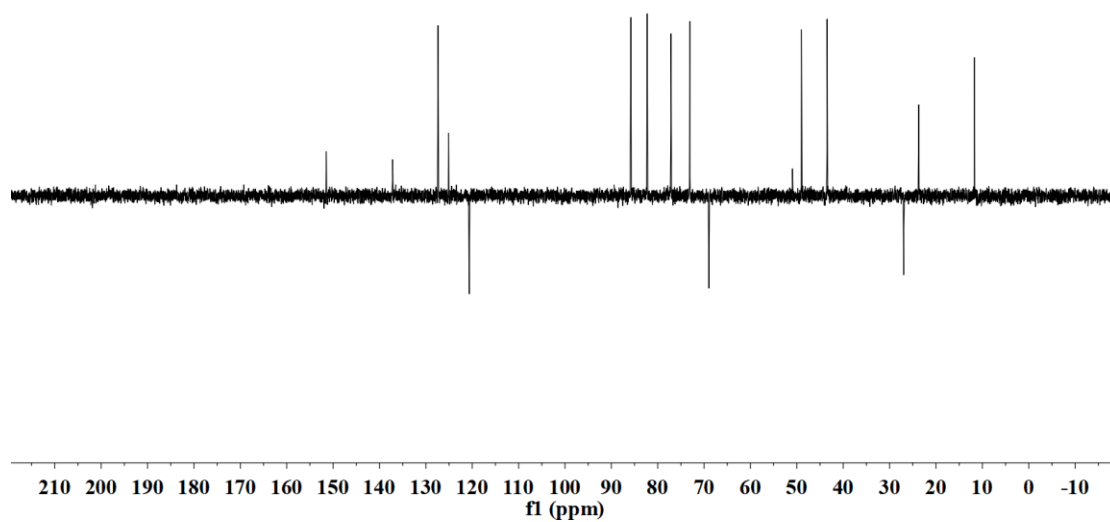

**Figure S134.** DEPT-135 spectrum of compound **14**
